# Supplementary material for: Cytotoxic Cyclolignans Obtained by the Enlargement of the Cyclolignan Skeleton of Podophyllic Aldehyde, a Selective Podophyllotoxin-Derived Cyclolignan
Source: MDPI journal article supplement (doi:10.3390/molecules29071442), 2024-03-23
Supplement: s1 [file s1]

# Cytotoxic Cyclolignans Obtained by the Enlargement of the Cyclolignan Skeleton of Podophyllic Aldehyde, a Selective Podophyllotoxin-Derived Cyclolignan

Pablo A. García <sup>1,\*</sup>, Ángela-Patricia Hernández <sup>1,2</sup>, M<sup>a</sup> Antonia Gómez-Zurita <sup>1</sup>, José M. Miguel del Corral <sup>1</sup>, Marina Gordaliza <sup>1</sup>, Andrés Francesch <sup>3</sup>, Arturo San Feliciano <sup>1,4</sup> and M<sup>a</sup> Ángeles Castro <sup>1,\*</sup>

- <sup>1</sup> Departamento de Ciencias Farmacéuticas, Área de Química Farmacéutica, Facultad de Farmacia, CIETUS/IBSAL, University of Salamanca, Campus Miguel de Unamuno, 37007 Salamanca, Spain; angytahg@usal.es (Á.-P.H.); marintogzf@gmail.com (M.A.G.-Z.); jmmcs@usal.es (J.M.M.d.C.); mliza@usal.es (M.G.); artsf@usal.es (A.S.F.)
- <sup>2</sup> Department of Medicine and General Cytometry Service-Nucleus, CIBERONC CB16/12/00400, Cancer Research Centre (IBMCC/CSIC/USAL/IBSAL), 37007 Salamanca, Spain
- <sup>3</sup> PharmaMar S.A., Avda de los Reyes, 1, 28770 Colmenar Viejo, Spain; afrancesch@pharmamar.com
- <sup>4</sup> Programa de Pós-Graduação em Ciências Farmacêuticas, Universidade do Vale do Itajaí, UNIVALI, Itajaí 88302-901, SC, Brazil
- \* Correspondence: pabloagg@usal.es (P.A.G.); macg@usal.es (M.A.C.)

## Table of contents

|                                                                                                                                           |    |
|-------------------------------------------------------------------------------------------------------------------------------------------|----|
| <b>Table S1.</b> Cytotoxicity data (GI <sub>50</sub> in $\mu$ M) for the synthesized cyclolignans .....                                   | 3  |
| <b>Table S2:</b> Swissadme results for compounds synthesized in this work. ....                                                           | 4  |
| <b>Table S3:</b> Additional Swissadme results for compounds synthesized in this work. ....                                                | 5  |
| <b>Table S4.</b> <sup>13</sup> C NMR data for thiazolidines <b>28-32</b> .....                                                            | 6  |
| <b>Table S5.</b> Correlations and assignments for compound <b>11</b> ( $\delta$ in ppm). ....                                             | 7  |
| <b>Table S6.</b> Correlations and assignments for compound <b>12</b> ( $\delta$ in ppm):.....                                             | 8  |
| <b>Table S7.</b> Correlations and assignments for compound <b>13</b> ( $\delta$ in ppm):.....                                             | 9  |
| <b>Table S8.</b> Correlations and assignments for compound <b>14</b> ( $\delta$ in ppm):.....                                             | 10 |
| <b>Table S9.</b> Correlations and assignments for compound <b>15</b> ( $\delta$ in ppm):.....                                             | 11 |
| <b>Table S10.</b> Correlations and assignments for compound <b>16</b> ( $\delta$ in ppm):.....                                            | 12 |
| <b>Table S11.</b> Correlations and assignments for compound <b>19</b> ( $\delta$ in ppm):.....                                            | 13 |
| <b>Table S12.</b> Correlations and assignments for compound <b>20</b> ( $\delta$ in ppm):.....                                            | 14 |
| <b>Table S13.</b> Correlations and assignments for compound <b>21</b> ( $\delta$ in ppm):.....                                            | 15 |
| <b>Table S14.</b> Correlations and assignments for compound <b>22</b> ( $\delta$ in ppm):.....                                            | 16 |
| <b>Table S15.</b> Correlations and assignments for compound <b>28</b> ( $\delta$ in ppm):.....                                            | 17 |
| <b>Table S16.</b> Correlations and assignments for compound <b>32</b> ( $\delta$ in ppm):.....                                            | 18 |
| <b>Figure S1:</b> Graphical representation of the Log P, TPSA and Log S values of the synthesized compounds, calculated by Swissadme..... | 19 |
| <b>Figure S2:</b> BOILED-Egg model obtained in Swissadme.....                                                                             | 20 |
| <b>Figure S3.</b> <sup>1</sup> H and <sup>13</sup> C NMR spectra for compound <b>3</b> .....                                              | 21 |
| <b>Figure S4.</b> HMQC and HMBC for compound <b>3</b> . ....                                                                              | 22 |
| <b>Figure S5.</b> <sup>1</sup> H and <sup>13</sup> C for compound <b>4</b> . ....                                                         | 23 |
| <b>Figure S6.</b> <sup>1</sup> H and <sup>13</sup> C for compound <b>5</b> . ....                                                         | 24 |
| <b>Figure S7.</b> <sup>1</sup> H and <sup>13</sup> C for compound <b>6</b> . ....                                                         | 25 |

|                                                                                  |    |
|----------------------------------------------------------------------------------|----|
| <b>Figure S8.</b> $^1\text{H}$ and $^{13}\text{C}$ for compound <b>7</b> .....   | 26 |
| <b>Figure S9.</b> $^1\text{H}$ and $^{13}\text{C}$ for compound <b>8</b> .....   | 27 |
| <b>Figure S10.</b> $^1\text{H}$ and $^{13}\text{C}$ for compound <b>9</b> .....  | 28 |
| <b>Figure S11.</b> $^1\text{H}$ and $^{13}\text{C}$ for compound <b>9a</b> ..... | 29 |
| <b>Figure S12.</b> $^1\text{H}$ and $^{13}\text{C}$ for compound <b>9b</b> ..... | 30 |
| <b>Figure S13.</b> $^1\text{H}$ and $^{13}\text{C}$ for compound <b>9c</b> ..... | 31 |
| <b>Figure S14.</b> $^1\text{H}$ and $^{13}\text{C}$ for compound <b>10</b> ..... | 32 |
| <b>Figure S15.</b> HMQC and HMBC for compound <b>10</b> .....                    | 33 |
| <b>Figure S16.</b> $^1\text{H}$ and $^{13}\text{C}$ for compound <b>11</b> ..... | 34 |
| <b>Figure S17.</b> HMQC and HMBC for compound <b>11</b> .....                    | 35 |
| <b>Figure S18.</b> $^1\text{H}$ and $^{13}\text{C}$ for compound <b>12</b> ..... | 36 |
| <b>Figure S19.</b> HMQC and HMBC for compound <b>12</b> .....                    | 37 |
| <b>Figure S20.</b> $^1\text{H}$ and $^{13}\text{C}$ for compound <b>13</b> ..... | 38 |
| <b>Figure S21.</b> HMQC and HMBC for compound <b>13</b> .....                    | 39 |
| <b>Figure S22.</b> $^1\text{H}$ and $^{13}\text{C}$ for compound <b>14</b> ..... | 40 |
| <b>Figure S23.</b> HMQC and HMBC for compound <b>14</b> .....                    | 41 |
| <b>Figure S24.</b> $^1\text{H}$ and $^{13}\text{C}$ for compound <b>15</b> ..... | 42 |
| <b>Figure S25.</b> HMQC and HMBC for compound <b>15</b> .....                    | 43 |
| <b>Figure S26.</b> $^1\text{H}$ and $^{13}\text{C}$ for compound <b>16</b> ..... | 44 |
| <b>Figure S27.</b> HMQC and HMBC for compound <b>16</b> .....                    | 45 |
| <b>Figure S28.</b> $^1\text{H}$ and $^{13}\text{C}$ for compound <b>17</b> ..... | 46 |
| <b>Figure S29.</b> $^1\text{H}$ and $^{13}\text{C}$ for compound <b>18</b> ..... | 47 |
| <b>Figure S30.</b> $^1\text{H}$ and $^{13}\text{C}$ for compound <b>19</b> ..... | 48 |
| <b>Figure S31.</b> HMQC and HMBC for compound <b>19</b> .....                    | 49 |
| <b>Figure S32.</b> $^1\text{H}$ and $^{13}\text{C}$ for compound <b>20</b> ..... | 50 |
| <b>Figure S33.</b> HMQC and HMBC for compound <b>20</b> .....                    | 51 |
| <b>Figure S34.</b> $^1\text{H}$ and $^{13}\text{C}$ for compound <b>21</b> ..... | 52 |
| <b>Figure S35.</b> HMQC and HMBC for compound <b>21</b> .....                    | 53 |
| <b>Figure S36.</b> $^1\text{H}$ and $^{13}\text{C}$ for compound <b>22</b> ..... | 54 |
| <b>Figure S37.</b> HMQC and HMBC for compound <b>22</b> .....                    | 55 |
| <b>Figure S38.</b> $^1\text{H}$ and $^{13}\text{C}$ for compound <b>28</b> ..... | 56 |
| <b>Figure S39.</b> HMQC and HMBC for compound <b>28</b> .....                    | 57 |
| <b>Figure S40.</b> $^1\text{H}$ and $^{13}\text{C}$ for compound <b>29</b> ..... | 58 |
| <b>Figure S41.</b> $^1\text{H}$ and $^{13}\text{C}$ for compound <b>30</b> ..... | 59 |
| <b>Figure S42.</b> $^1\text{H}$ and $^{13}\text{C}$ for compound <b>31</b> ..... | 60 |
| <b>Figure S43.</b> $^1\text{H}$ and $^{13}\text{C}$ for compound <b>32</b> ..... | 61 |
| <b>Figure S44.</b> HMQC and HMBC for compound <b>32</b> .....                    | 62 |

**Table S1.** Cytotoxicity data (GI<sub>50</sub> in  $\mu$ M) for the synthesized cyclolignans

| <b>Compound</b> | <b>A-549</b> | <b>HT-29</b> | <b>MEL-28</b> |
|-----------------|--------------|--------------|---------------|
| <b>1</b>        | 0.012        | 0.012        | -             |
| <b>2</b>        | 0.12         | 0.012        | 0.23          |
| <b>3</b>        | 0.27         | 0.27         | 0.27          |
| <b>4</b>        | 0.22         | 0.22         | 0.22          |
| <b>5</b>        | 0.27         | 0.27         | 0.27          |
| <b>6</b>        | 10           | 2.1          | 12            |
| <b>7</b>        | 2.6          | 2.6          | 2.6           |
| <b>8</b>        | 2.3          | 2.3          | 2.3           |
| <b>9</b>        | 0.061        | 0.061        | 0.061         |
| <b>9a</b>       | 0.024        | 0.024        | 0.024         |
| <b>9b</b>       | 0.024        | 0.024        | 0.024         |
| <b>10</b>       | 9.7          | 12           | 9.7           |
| <b>11</b>       | 2.5          | 2.5          | 2.5           |
| <b>12</b>       | 1.9          | 1.9          | 1.9           |
| <b>13</b>       | 0.92         | 0.92         | 0.92          |
| <b>14</b>       | 9.2          | 9.2          | 9.2           |
| <b>15</b>       | 1.7          | 1.7          | -             |
| <b>16</b>       | >9.7         | >9.7         | >9.7          |
| <b>17</b>       | >9.5         | >9.5         | >9.5          |
| <b>18</b>       | >9.1         | >9.1         | >9.1          |
| <b>19</b>       | >9.4         | >9.4         | 9.4           |
| <b>20</b>       | >8.4         | >8.4         | 8.4           |
| <b>21</b>       | 1.0          | 0.50         | 1.0           |
| <b>22</b>       | >9.7         | >9.7         | >9.7          |
| <b>28</b>       | 4.7          | 0.95         | -             |
| <b>29</b>       | 0.92         | 0.92         | -             |
| <b>30</b>       | 0.92         | 0.92         | -             |
| <b>31</b>       | 0.87         | 0.09         | -             |
| <b>32</b>       | >8.3         | 0.83         | -             |

**Table S2:** Swissadme results for compounds synthesized in this work.

| Compound  | MW     | Lipinski<br>#violations | #Rotatable<br>bonds | #H-bond<br>acceptors | #H-bond<br>donors | TPSA   | Log P |
|-----------|--------|-------------------------|---------------------|----------------------|-------------------|--------|-------|
| <b>1</b>  | 414.41 | 0                       | 4                   | 8                    | 1                 | 92.68  | 2.28  |
| <b>2</b>  | 426.42 | 0                       | 7                   | 8                    | 0                 | 89.52  | 2.93  |
| <b>3</b>  | 469.44 | 0                       | 8                   | 9                    | 0                 | 118.27 | 2.81  |
| <b>4</b>  | 452.45 | 0                       | 8                   | 8                    | 0                 | 89.52  | 3.31  |
| <b>5</b>  | 466.48 | 0                       | 8                   | 8                    | 0                 | 89.52  | 3.59  |
| <b>6</b>  | 482.48 | 0                       | 9                   | 9                    | 0                 | 98.75  | 3.52  |
| <b>7</b>  | 454.47 | 0                       | 8                   | 8                    | 1                 | 92.68  | 3.24  |
| <b>8</b>  | 426.46 | 0                       | 7                   | 7                    | 2                 | 86.61  | 3.02  |
| <b>9</b>  | 410.42 | 0                       | 4                   | 7                    | 0                 | 72.45  | 3.34  |
| <b>9a</b> | 410.42 | 0                       | 4                   | 7                    | 0                 | 72.45  | 3.37  |
| <b>9b</b> | 410.42 | 0                       | 4                   | 7                    | 0                 | 72.45  | 3.37  |
| <b>10</b> | 502.46 | 1                       | 7                   | 10                   | 0                 | 89.52  | 4.19  |
| <b>11</b> | 514.53 | 1                       | 7                   | 8                    | 1                 | 101.13 | 4.17  |
| <b>12</b> | 528.55 | 1                       | 8                   | 8                    | 1                 | 101.13 | 4.49  |
| <b>13</b> | 542.58 | 1                       | 7                   | 8                    | 1                 | 101.13 | 4.81  |
| <b>14</b> | 528.55 | 1                       | 7                   | 8                    | 1                 | 101.13 | 4.49  |
| <b>15</b> | 583.42 | 1                       | 7                   | 8                    | 1                 | 101.13 | 5.24  |
| <b>16</b> | 515.51 | 1                       | 7                   | 9                    | 0                 | 98.48  | 4.42  |
| <b>17</b> | 529.54 | 1                       | 7                   | 9                    | 0                 | 98.48  | 4.74  |
| <b>18</b> | 549.96 | 1                       | 7                   | 9                    | 0                 | 98.48  | 4.93  |
| <b>19</b> | 531.58 | 1                       | 7                   | 8                    | 0                 | 113.58 | 4.92  |
| <b>20</b> | 599.57 | 1                       | 8                   | 11                   | 0                 | 113.58 | 5.94  |
| <b>21</b> | 515.51 | 1                       | 7                   | 9                    | 1                 | 114.02 | 3.53  |
| <b>22</b> | 516.50 | 2                       | 7                   | 10                   | 1                 | 126.91 | 3.00  |
| <b>28</b> | 527.59 | 1                       | 8                   | 8                    | 0                 | 118.06 | 3.41  |
| <b>29</b> | 541.61 | 1                       | 9                   | 8                    | 0                 | 118.06 | 3.72  |
| <b>30</b> | 543.59 | 1                       | 9                   | 9                    | 1                 | 138.29 | 2.64  |
| <b>31</b> | 575.63 | 1                       | 8                   | 8                    | 0                 | 118.06 | 4.17  |
| <b>32</b> | 605.65 | 1                       | 9                   | 9                    | 0                 | 127.29 | 4.14  |



**Table S3:** Additional Swissadme results for compounds synthesized in this work.

| <b>Compound</b> | <b>GI<br/>absorption</b> | <b>BBB<br/>permeant</b> | <b>Pgp<br/>substrate</b> | <b>CYP1A2<br/>inhibitor</b> | <b>CYP2C19<br/>inhibitor</b> | <b>CYP2C9<br/>inhibitor</b> | <b>CYP2D6<br/>inhibitor</b> |
|-----------------|--------------------------|-------------------------|--------------------------|-----------------------------|------------------------------|-----------------------------|-----------------------------|
| <b>1</b>        | High                     | No                      | No                       | No                          | No                           | No                          | Yes                         |
| <b>2</b>        | High                     | No                      | No                       | No                          | Yes                          | Yes                         | Yes                         |
| <b>3</b>        | High                     | No                      | No                       | No                          | Yes                          | Yes                         | Yes                         |
| <b>4</b>        | High                     | No                      | No                       | No                          | Yes                          | Yes                         | Yes                         |
| <b>5</b>        | High                     | No                      | No                       | No                          | Yes                          | Yes                         | Yes                         |
| <b>6</b>        | High                     | No                      | No                       | No                          | Yes                          | Yes                         | Yes                         |
| <b>7</b>        | High                     | No                      | No                       | No                          | Yes                          | Yes                         | Yes                         |
| <b>8</b>        | High                     | No                      | Yes                      | No                          | No                           | Yes                         | Yes                         |
| <b>9</b>        | High                     | Yes                     | No                       | No                          | Yes                          | Yes                         | Yes                         |
| <b>9a</b>       | High                     | Yes                     | No                       | No                          | Yes                          | Yes                         | Yes                         |
| <b>9b</b>       | High                     | Yes                     | No                       | No                          | Yes                          | Yes                         | Yes                         |
| <b>10</b>       | High                     | No                      | No                       | No                          | Yes                          | Yes                         | Yes                         |
| <b>11</b>       | High                     | No                      | Yes                      | No                          | No                           | Yes                         | Yes                         |
| <b>12</b>       | High                     | No                      | Yes                      | No                          | No                           | Yes                         | Yes                         |
| <b>13</b>       | High                     | No                      | Yes                      | No                          | No                           | Yes                         | Yes                         |
| <b>14</b>       | High                     | No                      | Yes                      | No                          | No                           | Yes                         | Yes                         |
| <b>15</b>       | Low                      | No                      | Yes                      | No                          | No                           | Yes                         | Yes                         |
| <b>16</b>       | High                     | No                      | Yes                      | No                          | No                           | Yes                         | Yes                         |
| <b>17</b>       | High                     | No                      | Yes                      | No                          | No                           | Yes                         | Yes                         |
| <b>18</b>       | High                     | No                      | Yes                      | No                          | No                           | Yes                         | Yes                         |
| <b>19</b>       | Low                      | No                      | Yes                      | No                          | No                           | Yes                         | Yes                         |
| <b>20</b>       | Low                      | No                      | Yes                      | No                          | No                           | Yes                         | No                          |
| <b>21</b>       | High                     | No                      | Yes                      | No                          | No                           | Yes                         | Yes                         |
| <b>22</b>       | High                     | No                      | Yes                      | No                          | No                           | Yes                         | Yes                         |
| <b>28</b>       | High                     | No                      | No                       | No                          | Yes                          | Yes                         | Yes                         |
| <b>29</b>       | High                     | No                      | No                       | No                          | Yes                          | Yes                         | Yes                         |
| <b>30</b>       | High                     | No                      | No                       | No                          | No                           | Yes                         | Yes                         |
| <b>31</b>       | High                     | No                      | Yes                      | No                          | Yes                          | Yes                         | Yes                         |
| <b>32</b>       | Low                      | No                      | Yes                      | No                          | No                           | Yes                         | Yes                         |

**Table S4.**  $^{13}\text{C}$  NMR data for thiazolidines **28-32**

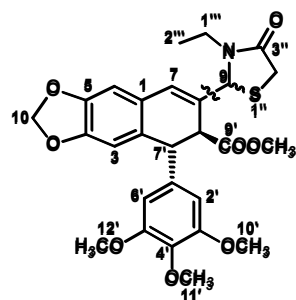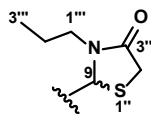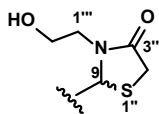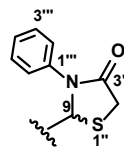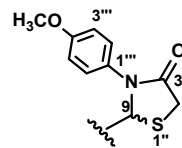

| C        | 28          | 29            | 30            | 31            | 32            |
|----------|-------------|---------------|---------------|---------------|---------------|
| 1        | 126.4/125.6 | 127.6 / 126.5 | 126.5 / 125.7 | 126.0         | 126.0         |
| 2        | 128.6/129.2 | 128.5         | 128.2 / 128.5 | 128.9         | 128.7         |
| 3        | 109.7/109.4 | 109.7 / 109.4 | 109.7 / 109.5 | 109.6         | 109.6         |
| 4        | 148.0       | 148.0         | 148.0         | 148.0         | 148.0         |
| 5        | 147.0/146.9 | 147.0 / 146.9 | 147.1         | 146.9         | 146.9         |
| 6        | 107.4/107.6 | 107.4 / 107.6 | 107.5         | 107.5         | 107.5         |
| 7        | 127.5/129.5 | 127.6 / 129.5 | 128.5 / 130.3 | 126.1         | 126.9 / 128.7 |
| 8        | 129.2/129.5 | 129.5 / 129.7 | 129.5 / 129.4 | 128.9         | 129.2         |
| 9        | 63.6/64.7   | 64.1 / 65.1   | 65.4 / 66.6   | 66.4          | 66.7          |
| 10       | 101.2       | 101.2         | 101.3         | 101.2         | 101.2         |
| 1'       | 137.8/138.0 | 137.8         | 137.8         | 137.8 / 138.0 | 138.1         |
| 2'. 6'   | 105.1/105.0 | 104.9         | 104.9         | 104.9         | 104.9         |
| 3'. 5'   | 153.1       | 153.1         | 153.1         | 153.0         | 153.0         |
| 4'       | 137.2       | 137.1         | 137.1         | 136.9         | 136.9         |
| 7'       | 46.9/47.6   | 46.8 / 47.5   | 46.9 / 47.6   | 46.5          | 46.8 / 47.7   |
| 8'       | 48.0/47.2   | 47.8 / 47.5   | 48.0 / 47.3   | 48.9          | 48.6 / 49.2   |
| 9'       | 172.3/172.0 | 172.3 / 172.0 | 172.4         | 172.3         | 172.6 / 171.9 |
| 10'. 12' | 56.1        | 56.1          | 56.2          | 56.0          | 55.9 / 56.0   |
| 11'      | 60.8        | 60.8 / 60.3   | 60.8          | 60.8          | 60.8          |
| 9'-      | 52.4        | 52.4          | 52.5          | 52.4          | 52.4          |
| 2''      | 32.2/32.9   | 32.1 / 32.8   | 31.9 / 32.7   | 32.7          | 32.7 / 33.1   |
| 3''      | 170.9/170.4 | 171.1 / 170.7 | 172.1         | 171.1 / 170.9 | 170.9         |
| 1'''     | 36.7/37.3   | 43.4 / 44.0   | 44.7          | 137.8         | 130.1 / 130.9 |
| 2'''     | 11.8        | 19.7 / 19.8   | 60.8          | 123.0         | 125.1         |
| 3'''     |             | 11.0 / 14.1   |               | 128.9         | 114.1         |
| 4'''     |             |               |               | 125.8         | 157.7         |
| 5'''     |             |               |               | 128.9         | 114.1         |
| 6'''     |             |               |               | 123.0         | 125.1         |
| 4'''-    |             |               |               |               | 55.3 / 55.4   |

**Table S5.** Correlations and assignments for compound **11** ( $\delta$  in ppm).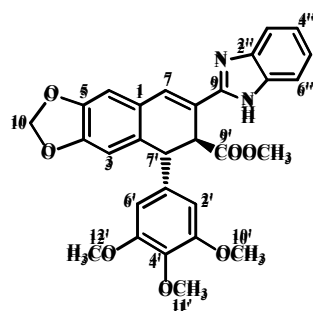

| $\delta$ $^{13}\text{C}$ | TYPE*           | HMQC, $\delta$ $^1\text{H}$<br>( <i>J</i> in Hz) | HMBC, $\delta$ $^1\text{H}$     | Assigned                |
|--------------------------|-----------------|--------------------------------------------------|---------------------------------|-------------------------|
| 46,1                     | CH              | 4,65 d                                           | 6,70 s, 6,35 s, 4,50 sa         | 7'                      |
| 47,7                     | CH              | 4,50 sa                                          | 7,38 sa, 4,65 d                 | 8'                      |
| 52,7                     | CH <sub>3</sub> | 3,65 s                                           |                                 | 9'-OCH <sub>3</sub>     |
| 56,0                     | CH <sub>3</sub> | 3,69 s                                           |                                 | 3', 5'-OCH <sub>3</sub> |
| 60,7                     | CH <sub>3</sub> | 3,74 s                                           |                                 | 4'-OCH <sub>3</sub>     |
| 101,3                    | CH <sub>2</sub> | 5,95 d, 5,93 d                                   |                                 | 10                      |
| 104,8                    | CH              | 6,35 s                                           | 6,35 s, 4,65 d                  | 2', 5'                  |
| 107,9                    | CH              | 6,61 sa                                          | 7,38 sa                         | 6                       |
| 109,6                    | CH              | 6,70 s                                           | 4,65 d                          | 3                       |
| 122,0                    | C               |                                                  | 4,65 d, 4,50 sa                 | 8                       |
| 122,7                    | CH              | 7,15 m                                           |                                 | 4'', 5''                |
| 126,0                    | C               |                                                  | 6,70 s, 4,65 d                  | 1                       |
| 129,2                    | CH              | 7,38 sa                                          | 6,61 sa, 4,50 sa                | 7                       |
| 130,1                    | C               |                                                  | 7,38 sa, 4,65 d                 | 2                       |
| 136,7                    | C               |                                                  | 6,35 s, 3,74 s                  | 4'                      |
| 138,0                    | C               |                                                  | 4,65 d, 4,50 sa                 | 1'                      |
| 147,0                    | C               |                                                  | 6,70 s, 6,61 sa, 5,95 d, 5,93 d | 5                       |
| 148,3                    | C               |                                                  | 6,70 s, 6,61 sa, 5,95 d, 5,93 d | 4                       |
| 151,5                    | C               |                                                  | 7,38 sa, 4,50 sa                | 9                       |
| 153,0                    | C               |                                                  | 6,35 s, 3,69 s                  | 3', 5'                  |
| 173,2                    | C               |                                                  | 4,65 d, 4,50 sa, 3,65 s         | 9'                      |

\* Carbon type according to DEPT experiment

**Table S6.** Correlations and assignments for compound **12** ( $\delta$  in ppm):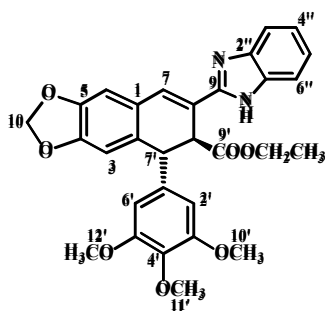

| $\delta$ $^{13}\text{C}$ | TYPE*           | HMQC, $\delta$ $^1\text{H}$<br>( $J$ in Hz) | HMBC, $\delta$ $^1\text{H}$    | Assigned                            |
|--------------------------|-----------------|---------------------------------------------|--------------------------------|-------------------------------------|
| 14,0                     | CH <sub>3</sub> | 1,14 t                                      | (4,13 dc)                      | 9'-OCH <sub>2</sub> CH <sub>3</sub> |
| 46,0                     | CH              | 4,64 sa                                     | 6,70 s, 6,36 s                 | 7'                                  |
| 48,2                     | CH              | 4,39 sa                                     | 4,64 sa                        | 8'                                  |
| 56,1                     | CH <sub>3</sub> | 3,71 s                                      |                                | 3', 5'-OCH <sub>3</sub>             |
| 60,7                     | CH <sub>3</sub> | 3,73 s                                      |                                | 4'-OCH <sub>3</sub>                 |
| 61,7                     | CH <sub>2</sub> | 4,13 dc                                     | 1,14 t                         | 9'-OCH <sub>2</sub> CH <sub>3</sub> |
| 101,4                    | CH <sub>2</sub> | 5,98 s, 5,97 s                              |                                | 10                                  |
| 104,7                    | CH              | 6,36 s                                      | 6,36 s, 4,64 sa                | 2', 6'                              |
| 108,2                    | CH              | 6,76 s                                      |                                | 6                                   |
| 109,6                    | CH              | 6,70 s                                      |                                | 3                                   |
| 123,1                    | CH / CH         | 7,16 m                                      |                                | 7 / 4'', 5''                        |
| 125,8                    | C               |                                             | 6,70 s, (4,64 sa)              | 1                                   |
| 130,6                    | C               |                                             | 6,76 s, (4,64 sa), 4,39 sa     | 2                                   |
| 136,9                    | C               |                                             | 6,36 s, 3,73 s                 | 4'                                  |
| 137,7                    | C               |                                             | 4,64 sa                        | 1'                                  |
| 147,0                    | C               |                                             | 6,76 s, 6,70 s, 5,98 s, 5,97 s | 5                                   |
| 148,6                    | C               |                                             | 6,76 s, 6,70 s, 5,98 s, 5,97 s | 4                                   |
| 151,2                    | CH              |                                             |                                | 9                                   |
| 153,1                    | C               |                                             | 6,36 s, 3,71 s                 | 3', 5'                              |
| 172,4                    | C               |                                             | (4,39 sa), (4,13 dc)           | 9'                                  |

\* Carbon type according to DEPT experiment

**Table S7.** Correlations and assignments for compound **13** ( $\delta$  in ppm):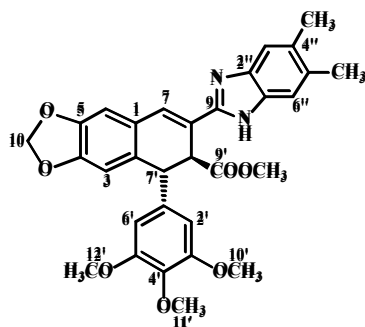

| $\delta^{13}\text{C}$ | TYPE*           | HMQC, $\delta^1\text{H}$<br>( <i>J</i> in Hz) | HMBC, $\delta^1\text{H}$       | Assigned                 |
|-----------------------|-----------------|-----------------------------------------------|--------------------------------|--------------------------|
| 20,3                  | CH <sub>3</sub> | 2,30 s                                        |                                | 4'', 5''-CH <sub>3</sub> |
| 46,2                  | CH              | 4,63 d                                        | 6,70 s, 6,36 s, 4,48 d         | 7'                       |
| 47,7                  | CH              | 4,48 d                                        | 7,31 s, 4,63 d                 | 8'                       |
| 52,7                  | CH <sub>3</sub> | 3,67 s                                        |                                | 9'-OCH <sub>3</sub>      |
| 56,1                  | CH <sub>3</sub> | 3,69 s                                        |                                | 3', 5'-OCH <sub>3</sub>  |
| 60,7                  | CH <sub>3</sub> | 3,73 s                                        |                                | 4'-OCH <sub>3</sub>      |
| 101,3                 | CH <sub>2</sub> | 5,96 d, 5,95 d                                |                                | 10                       |
| 104,7                 | CH              | 6,36 s                                        | 6,36 s, 4,63 d                 | 2', 6'                   |
| 108,0                 | CH              | 6,65 s                                        | 7,31 s                         | 6                        |
| 109,6                 | CH              | 6,70 s                                        | 4,63 d                         | 3                        |
| 110,7 <sup>#</sup>    | CH              |                                               | 2,30 s                         | 3''                      |
| 119,2 <sup>#</sup>    | CH              |                                               | 2,30 s                         | 6''                      |
| 122,2                 | C               |                                               | 4,63 d, 4,48 d                 | 8                        |
| 126,1                 | C               |                                               | 6,70 s                         | 1                        |
| 128,3                 | CH              | 7,31 s                                        | 6,65 s, 4,48 d                 | 7                        |
| 130,3                 | C               |                                               | 7,31 s, 6,65 s, 4,63 d, 4,48 d | 2                        |
| 131,1 <sup>§</sup>    | C               |                                               | 2,30 s                         | 4''                      |
| 132,3 <sup>§</sup>    | C               |                                               | 2,30 s                         | 5''                      |
| 136,8                 | C               |                                               | 6,36 s, 3,73 s                 | 4'                       |
| 137,9                 | C               |                                               | 4,63 d, 4,48 d                 | 1'                       |
| 146,9                 | C               |                                               | 6,70 s, 5,96 d, 5,95 d         | 5                        |
| 148,2                 | C               |                                               | 6,65 s, 5,96 d, 5,95 d         | 4                        |
| 150,5                 | C               |                                               | 7,31 s, 4,48 d                 | 9                        |
| 153,0                 | C               |                                               | 6,36 s, 3,69 s                 | 3', 5'                   |
| 173,3                 | C               |                                               | 4,63 d, 4,48 d, 3,67 s         | 9'                       |

\* Carbon type according to DEPT experiment

#, § Interchangeable signals

**Table S8.** Correlations and assignments for compound **14** ( $\delta$  in ppm):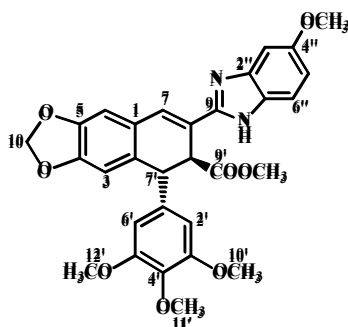

| $\delta$ <sup>13</sup> C | TYPE*           | HMQC, $\delta$ <sup>1</sup> H<br>( <i>J</i> in Hz) | HMBC, $\delta$ <sup>1</sup> H | Assigned                |
|--------------------------|-----------------|----------------------------------------------------|-------------------------------|-------------------------|
| 46,1                     | CH              | 4,65 d                                             | 6,70 s, 6,34 s, 4,46 d        | 7'                      |
| 47,7                     | CH              | 4,46 d                                             | (7,37 s), 4,65 d              | 8'                      |
| 52,8                     | CH <sub>3</sub> | 3,69 s                                             |                               | 9'-OCH <sub>3</sub>     |
| 55,6                     | CH <sub>3</sub> | 3,81 s                                             |                               | 4''-OCH <sub>3</sub>    |
| 56,1                     | CH <sub>3</sub> | 3,71 s                                             |                               | 3', 5'-OCH <sub>3</sub> |
| 60,7                     | CH <sub>3</sub> | 3,73 s                                             |                               | 4'-OCH <sub>3</sub>     |
| 101,4                    | CH <sub>2</sub> | 5,97 d, 5,96 d                                     |                               | 10                      |
| 104,8                    | CH              | 6,34 s                                             | 6,34 s, 4,65 d                | 2', 6'                  |
| 108,1                    | CH              | 6,66 s                                             |                               | 6                       |
| 109,6                    | CH              | 6,70 s                                             | 4,65 d                        | 3                       |
| 112,6                    | CH              | 6,78 d                                             |                               | 3'', 6''                |
| 121,4                    | C               |                                                    | 4,65 d, (4,46 d)              | 8                       |
| 126,0                    | C               |                                                    | 6,70 s, 4,65 d                | 1                       |
| 129,0                    | CH              |                                                    |                               | 7                       |
| 130,2                    | C               |                                                    | 6,66 s, 4,65 d, 4,46 d        | 2                       |
| 136,9                    | C               |                                                    | 6,34 s, 3,73 s                | 4'                      |
| 137,9                    | C               |                                                    | 4,65 d, 4,46 d                | 1'                      |
| 147,1                    | C               |                                                    | 6,70 s, 5,97 d, 5,96 d        | 5                       |
| 148,4                    | C               |                                                    | 6,66 s, 5,97 d, 5,96 d        | 4                       |
| 150,8                    | C               |                                                    | (4,46 d)                      | 9                       |
| 153,0                    | C               |                                                    | 6,34 s, 3,71 s                | 3', 5'                  |
| 156,7                    | C               |                                                    | (6,78 d), 3,81 s              | 4''                     |
| 173,4                    | C               |                                                    | 4,65 d, 4,46 d                | 4                       |

\* Carbon type according to DEPT experiment

**Table S9.** Correlations and assignments for compound **15** ( $\delta$  in ppm):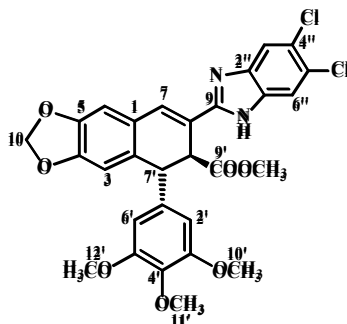

| $\delta^{13}\text{C}$ | TYPE*           | HMQC, $\delta^1\text{H}$<br>( <i>J</i> in Hz) | HMBC, $\delta^1\text{H}$       | Assigned                |
|-----------------------|-----------------|-----------------------------------------------|--------------------------------|-------------------------|
| 46,3                  | CH              | 4,68 d                                        | 6,69 s, 6,33 s, 4,66 d         | 7'                      |
| 47,6                  | CH              | 4,66 d                                        | 7,15 s, 4,68 d                 | 8'                      |
| 53,2                  | CH <sub>3</sub> | 3,82 s                                        |                                | 9'-OCH <sub>3</sub>     |
| 56,2                  | CH <sub>3</sub> | 3,71 s                                        |                                | 3', 5'-OCH <sub>3</sub> |
| 60,7                  | CH <sub>3</sub> | 3,74 s                                        |                                | 4'-OCH <sub>3</sub>     |
| 101,5                 | CH <sub>2</sub> | 5,97 d, 5,94 d                                |                                | 10                      |
| 105,1                 | CH              | 6,33 s                                        | 6,33 s, 4,68 d                 | 2', 6'                  |
| 108,2                 | CH              | 6,24 s                                        | 7,15 s                         | 6                       |
| 109,6                 | CH              | 6,69 s                                        | 4,68 d                         | 3                       |
| 121,3                 | C               |                                               | 4,68 d, 4,66 d                 | 8                       |
| 125,6                 | C               |                                               | 7,15 s, 6,69 s, 4,68 d         | 1                       |
| 130,1                 | C               |                                               | 7,15 s, 6,24 s, 4,68 d         | 2                       |
| 130,2                 | CH              | 7,15 s                                        | 6,24 s, 4,66 d                 | 7                       |
| 137,1                 | C               |                                               | 6,33 s, 3,74 s                 | 4'                      |
| 137,7                 | C               |                                               | 4,68 d, 4,66 d                 | 1'                      |
| 147,0                 | C               |                                               | 6,69 s, 6,24 s, 5,97 d, 5,94 d | 5                       |
| 148,6                 | C               |                                               | 6,69 s, 6,24 s, 5,97 d, 5,94 d | 4                       |
| 152,9                 | C               |                                               | 7,15 s, 4,66 d                 | 9                       |
| 153,1                 | C               |                                               | 6,33 s, 3,71 s                 | 3', 5'                  |
| 174,7                 | C               |                                               | 7,15 s, 4,68 d, 4,66 d         | 9'                      |

\* Carbon type according to DEPT experiment

**Table S10.** Correlations and assignments for compound **16** ( $\delta$  in ppm):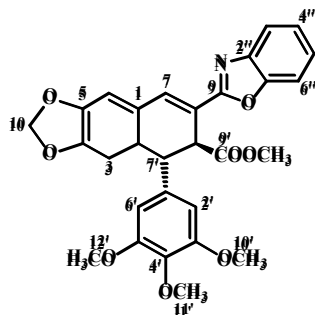

| $\delta^{13}\text{C}$ | TYPE*           | HMQC, $\delta^1\text{H}$<br>( <i>J</i> in Hz) | HMBC, $\delta^1\text{H}$           | Assigned                |
|-----------------------|-----------------|-----------------------------------------------|------------------------------------|-------------------------|
| 46,2                  | CH              | 4,72 d                                        | (6,72 s), 6,30 s, 4,40 d           | 7'                      |
| 47,4                  | CH              | 4,40 d                                        | 7,73 s, 4,72 d                     | 8'                      |
| 52,7                  | CH <sub>3</sub> | 3,65 s                                        |                                    | 9'-OCH <sub>3</sub>     |
| 56,0                  | CH <sub>3</sub> | 3,72 s                                        |                                    | 3', 5'-OCH <sub>3</sub> |
| 60,7                  | CH <sub>3</sub> | 3,75 s                                        |                                    | 4'-OCH <sub>3</sub>     |
| 101,5                 | CH <sub>2</sub> | 6,01 d, 5,99 d                                |                                    | 10                      |
| 104,8                 | CH              | 6,30 s                                        | 6,30 s, 4,72 d                     | 2', 6'                  |
| 108,4                 | CH              | 6,90 s                                        | (7,73 s)                           | 6                       |
| 110,0                 | CH              | 6,72 s                                        | 4,72 d                             | 3                       |
| 110,2                 | CH              | (7,49 m)                                      |                                    | 6''                     |
| 119,4                 | C               |                                               | 4,72 d, 4,40 d                     | 8                       |
| 119,8                 | CH              | (7,67 m)                                      |                                    | 3''                     |
| 124,4                 | CH              |                                               | 7,49 m                             | 4''                     |
| 126,0                 | C               |                                               | 6,72 s, (4,72 d)                   | 1                       |
| 131,0                 | C               |                                               | 7,73 s, 6,90 s, 4,72 d, 4, 40 d    | 2                       |
| 132,7                 | CH              | 7,73 s                                        | 6,90 s, 4,40 d                     | 7                       |
| 137,0                 | C               |                                               | 6,30 s, 3,75 s                     | 4'                      |
| 137,6                 | C               |                                               | 4,72 d, 4,40 d                     | 1'                      |
| 142,1                 | C               |                                               | (7,49 m)                           | 2''                     |
| 147,2                 | C               |                                               | (6,90 s), 6,72 s, (6,01 s, 5,99 s) | 5                       |
| 149,0                 | C               |                                               | 6,90 s, (6,72 s), (6,01 s, 5,99 s) | 4                       |
| 150,5                 | C               |                                               | (7,67 m)                           | 1''                     |
| 153,1                 | C               |                                               | 6,30 s, 3,72 s                     | 3', 5'                  |
| 163,0                 | C               |                                               | 7,73 s, (4,40 d)                   | 9                       |
| 172,2                 | C               |                                               | 4,72 d, 4,40 d, 3,65 s             | 9'                      |

\* Carbon type according to DEPT experiment



**Table S11.** Correlations and assignments for compound **19** ( $\delta$  in ppm):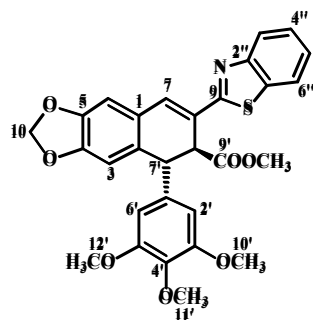

| $\delta^{13}\text{C}$ | TYPE*           | HMQC, $\delta^1\text{H}$<br>( <i>J</i> in Hz) | HMBC, $\delta^1\text{H}$       | Assigned                |
|-----------------------|-----------------|-----------------------------------------------|--------------------------------|-------------------------|
| 46,5                  | CH              | 4,67 d                                        | 6,73 s, 6,38 s, 4,61 d         | 7'                      |
| 48,3                  | CH              | 4,61 d                                        | 7,40 s, 4,67 d                 | 8'                      |
| 52,5                  | CH <sub>3</sub> | 3,62 s                                        |                                | 9'-OCH <sub>3</sub>     |
| 56,0                  | CH <sub>3</sub> | 3,71 s                                        |                                | 3', 5'-OCH <sub>3</sub> |
| 60,7                  | CH <sub>3</sub> | 3,75 s                                        |                                | 4'-OCH <sub>3</sub>     |
| 101,4                 | CH <sub>2</sub> | 5,99 s, 5,98 s                                |                                | 10                      |
| 104,6                 | CH              | 6,38 s                                        | 6,38 s, 4,67 d                 | 2', 6'                  |
| 108,2                 | CH              | 6,86 s                                        | 7,40 s                         | 6                       |
| 109,8                 | CH              | 6,73 s                                        | 4,67 d                         | 3                       |
| 121,3                 | CH              | 7,82 m                                        | 7,42 m                         | 6''                     |
| 123,0                 | CH              | 7,92 m                                        | 7,34 m                         | 3''                     |
| 125,2                 | CH              | 7,34 m                                        | 7,92 m                         | 5''                     |
| 126,0                 | CH              | 7,42 m                                        | 7,82 m                         | 4''                     |
| 126,1                 | C               |                                               | 6,73 s, 4,67 d                 | 1                       |
| 127,4                 | C               |                                               | 4,67 d, 4,61 d                 | 8                       |
| 131,3                 | C               |                                               | 7,40 s, 6,86 s, 4,67 d, 4,61 d | 2                       |
| 131,8                 | CH              | 7,40 s                                        | 6,86 s                         | 7                       |
| 134,4                 | C               |                                               | 7,92 m, 7,34 m                 | 2''                     |
| 136,8                 | C               |                                               | 6,38 s, 3,75 s                 | 4'                      |
| 137,8                 | C               |                                               | 4,67 d, 4,61 d                 | 1'                      |
| 147,1                 | C               |                                               | 6,86 s, 6,73 s, 5,99 s, 5,98 s | 5                       |
| 148,7                 | C               |                                               | 6,86 s, 6,73 s, 5,99 s, 5,98 s | 4                       |
| 153,0                 | C               |                                               | 6,38 s, 3,71 s                 | 3', 5'                  |
| 153,7                 | C               |                                               | 7,82 m, 7,42 m                 | 1''                     |
| 167,8                 | C               |                                               | 7,40 s, 4,61 d                 | 9                       |
| 172,5                 | C               |                                               | 4,67 d, 4,61 d, 3,62 s         | 9'                      |

\* Carbon type according to DEPT experiment

**Table S12.** Correlations and assignments for compound **20** ( $\delta$  in ppm):

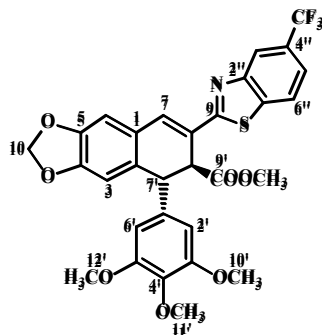

| $\delta^{13}\text{C}$ | TYPE*           | HMQC, $\delta^1\text{H}$<br>( <i>J</i> in Hz) | HMBC, $\delta^1\text{H}$       | Assigned                |
|-----------------------|-----------------|-----------------------------------------------|--------------------------------|-------------------------|
| 46,5                  | CH              | 4,69 d                                        | 6,73 s, 6,36 s, 4,58 d         | 7'                      |
| 48,4                  | CH              | 4,58 d                                        | 7,43 s, 4,69 d                 | 8'                      |
| 52,6                  | CH <sub>3</sub> | 3,64 s                                        |                                | 9'-OCH <sub>3</sub>     |
| 56,1                  | CH <sub>3</sub> | 3,72 s                                        |                                | 3', 5'-OCH <sub>3</sub> |
| 60,7                  | CH <sub>3</sub> | 3,75 s                                        |                                | 4'-OCH <sub>3</sub>     |
| 101,5                 | CH <sub>2</sub> | 6,01 d, 5,99 d                                |                                | 10                      |
| 104,6                 | CH              | 6,36 s                                        | 6,36 s, 4,69 d                 | 2', 6'                  |
| 108,3                 | CH              | 6,87 s                                        | 7,43 s                         | 6                       |
| 109,9                 | CH              | 6,73 s                                        | 4,69 d                         | 3                       |
| 120,1                 | CH              | 8,19 s                                        | 7,56 dd                        | 3''                     |
| 121,5                 | CH              | 7,56 dd                                       | 8,19 s                         | 5''                     |
| 121,9                 | CH              | 7,92 d                                        |                                | 6''                     |
| 125,5                 | C               |                                               | 8,19 s, 7,56 dd                | 4''-CF <sub>3</sub>     |
| 125,8                 | C               |                                               | 7,43 s, 6,73 s                 | 1                       |
| 127,0                 | C               |                                               | 4,69 d, 4,58 d                 | 8                       |
| 129,1                 | C               |                                               | 7,92 d                         | 2''                     |
| 131,5                 | C               |                                               | 7,43 s, 6,87 s, 4,69 d, 4,58 d | 2                       |
| 133,1                 | CH              | 7,43 s                                        | 6,87 s, 4,58 d                 | 7                       |
| 137,0                 | C               |                                               | 6,36 s, 3,75 s                 | 4'                      |
| 137,7                 | C               |                                               | 4,69 d, 4,58 d                 | 1'                      |
| 137,8                 | C               |                                               | 8,19 s, 7,56 dd                | 1''                     |
| 147,2                 | C               |                                               | 6,87 s, 6,73 s, 6,01 s, 5,99 s | 5                       |
| 149,0                 | C               |                                               | 6,87 s, 6,73 s, 6,01 s, 5,99 s | 4                       |
| 153,1                 | C               |                                               | 6,36 s, 3,72 s                 | 3', 5'                  |
| 153,3                 | C               |                                               | 7,92 d                         | 4''                     |
| 169,8                 | C               |                                               | 7,43 s, 4,58 d                 | 9                       |
| 172,3                 | C               |                                               | 4,69 d, 4,58 d, 3,64 s         | 9'                      |

\* Carbon type according to DEPT experiment

**Table S13.** Correlations and assignments for compound **21** ( $\delta$  in ppm):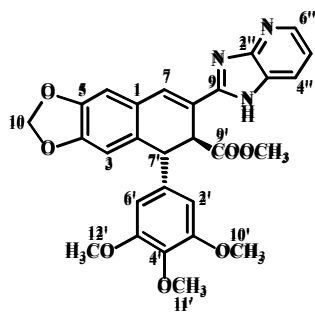

| $\delta^{13}\text{C}$ | TYPE*           | HMQC, $\delta^1\text{H}$<br>( <i>J</i> in Hz) | HMBC, $\delta^1\text{H}$         | Assigned                |
|-----------------------|-----------------|-----------------------------------------------|----------------------------------|-------------------------|
| 46,2                  | CH              | 4,75 d                                        | 6,75 s, 6,36 s, 4,61 d           | 7'                      |
| 47,5                  | CH              | 4,61 d                                        | 7,65 s, 4,75 d                   | 8'                      |
| 52,6                  | CH <sub>3</sub> | 3,63 d                                        |                                  | 9'-OCH <sub>3</sub>     |
| 55,9                  | CH <sub>3</sub> | 3,67 s                                        |                                  | 3', 5'-OCH <sub>3</sub> |
| 60,6                  | CH <sub>3</sub> | 3,72 s                                        |                                  | 4'-OCH <sub>3</sub>     |
| 101,5                 | CH <sub>2</sub> | 6,02 s, 6,00 s                                |                                  | 10                      |
| 104,6                 | CH              | 6,36 s                                        | 6,36 s, 4,75 d                   | 2', 6'                  |
| 107,9                 | CH              | 6,84 s                                        | 7,65 s                           | 6                       |
| 109,9                 | CH              | 6,75 s                                        | 4,75 d                           | 3                       |
| 118,2                 | CH              | 7,26 m                                        |                                  | 5''                     |
| 122,4                 | C               |                                               | 4,75 d, 4,61 d                   | 8                       |
| 126,0                 | C               |                                               | 6,75 s, 4,75 d                   | 1                       |
| 130,6                 | C               |                                               | 7,65 s, 6,84 s, 4,75 d, 4,61 d   | 2                       |
| 130,8                 | CH              | 7,65 s                                        | 6,84 s, 4,61 d                   | 7                       |
| 136,7                 | C               |                                               | 6,36 s, 3,72 s                   | 4'                      |
| 137,7                 | C               |                                               | 4,75 d, 4,61 d                   | 1'                      |
| 142,4                 | CH              | 8,35 d                                        |                                  | 4''                     |
| 147,2                 | C               |                                               | (6,84 s), 6,75 s, 6,02 s, 6,00 s | 5                       |
| 148,7                 | C               |                                               | 6,84 s, 6,75 s, 6,02 s, 6,00 s   | 9                       |
| 153,0                 | C               |                                               | 6,36 s, 3,67 s                   | 3', 5'                  |
| 153,8                 | C               |                                               | 7,65 s, 4,61 d                   | 9                       |
| 172,6                 | C               |                                               | 4,75 d, 4,61 d, 3,63 s           | 9'                      |

\* Carbon type according to DEPT experiment

**Table S14.** Correlations and assignments for compound **22** ( $\delta$  in ppm):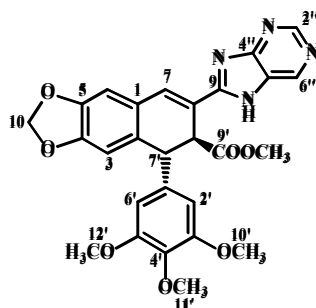

| $\delta^{13}\text{C}$ | TYPE*           | HMQC, $\delta^1\text{H}$<br>( <i>J</i> in Hz) | HMBC, $\delta^1\text{H}$ | Assigned                |
|-----------------------|-----------------|-----------------------------------------------|--------------------------|-------------------------|
| 46,1                  | CH              | 4,74 d                                        | 6,73 s, 6,31 s, 4,55 d   | 7'                      |
| 47,6                  | CH              | 4,55 d                                        | 7,58 s, 4,74 d           | 8'                      |
| 52,8                  | CH <sub>3</sub> | 3,69 s                                        |                          | 9'-OCH <sub>3</sub>     |
| 56,1                  | CH <sub>3</sub> | 3,70 s                                        |                          | 3', 5'-OCH <sub>3</sub> |
| 60,7                  | CH <sub>3</sub> | 3,73 s                                        |                          | 4'-OCH <sub>3</sub>     |
| 101,6                 | CH <sub>2</sub> | 6,01 s, 6,00 s                                |                          | 10                      |
| 104,8                 | CH              | 6,31 s                                        | 6,31 s, 4,74 d           | 2', 6'                  |
| 108,2                 | CH              | 6,75 s                                        | 7,58 s                   | 6                       |
| 110,0                 | CH              | 6,73 s                                        | 4,74 d                   | 3                       |
| 121,4                 | C               |                                               | 4,74 d, 4,55 d           | 8                       |
| 125,4                 | C               |                                               | 6,73 s, 4,74 d           | 1                       |
| 131,0                 | C               |                                               | 7,58 s, 6,75 s           | 2                       |
| 132,3                 | CH              | 7,58 s                                        | 6,75 s, 4,55 d           | 7                       |
| 135,2                 | C               |                                               | 9,04 s                   | 5''                     |
| 137,1                 | C               |                                               | 6,31 s, 3,73 s           | 4'                      |
| 137,5                 | C               |                                               | 4,74 d, 4,55 d           | 1'                      |
| 147,2                 | CH              | 9,04 s                                        | 8,95 s                   | 6''                     |
| 147,3                 | C               |                                               | 6,73 s, 6,01 s, 6,00 s   | 5                       |
| 149,3                 | C               |                                               | 6,73 s, 6,01 s, 6,00 s   | 4                       |
| 151,5                 | CH              | 8,95 s                                        | 9,04 s                   | 2''                     |
| 153,1                 | C               |                                               | 6,31 s, 3,70 s           | 9                       |
| 153,2                 | C               |                                               | 9,04 s, 8,95 s           | 4''                     |
| 154,4                 | C               |                                               | 7,58 s, 4,55 d           | 9                       |
| 172,5                 | C               |                                               | 4,74 d, 4,55 d, 3,69 s   | 9'                      |

\* Carbon type according to DEPT experiment

**Table S15.** Correlations and assignments for compound **28** ( $\delta$  in ppm):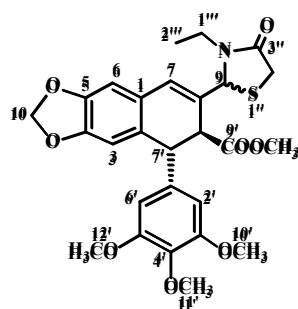

| $\delta^{13}\text{C}$ | TYPE*           | HMQC, $\delta^1\text{H}$<br>( <i>J</i> in Hz) | HMBC, $\delta^1\text{H}$          | Assigned                |
|-----------------------|-----------------|-----------------------------------------------|-----------------------------------|-------------------------|
| 11,8 / 11,8           | CH <sub>3</sub> | 0,95 t / 1,05 t                               |                                   | 2'''                    |
| 32,2 / 32,9           | CH <sub>2</sub> | 3,48 d, 3,45 s / 3,61 d, 3,41 s               |                                   | 2''                     |
| 36,7 / 37,3           | CH <sub>2</sub> |                                               | 0,95 t / 1,05 t                   | 1'''                    |
| 46,9 / 47,6           | CH              | 4,41 d / 4,32 d                               | 6,18 s / 6,28 s                   | 7'                      |
| 48,0 / 47,2           | CH              | 3,23 d / 3,63 d                               | 6,47 s / 6,55 s                   | 8'                      |
| 52,4 / 52,4           | CH <sub>3</sub> | 3,66 s / 3,61 s                               |                                   | 9'-OCH <sub>3</sub>     |
| 56,1 / 56,1           | CH <sub>3</sub> | 3,73 s / 3,76 s                               |                                   | 3', 5'-OCH <sub>3</sub> |
| 60,8 / 60,8           | CH <sub>3</sub> | 3,77 s / 3,80 s                               |                                   | 4'-OCH <sub>3</sub>     |
| 63,6 / 64,7           | CH              | 5,27 d / 5,25 d                               | 6,47 s / 6,55 s                   | 9                       |
| 101,2 / 101,2         | CH <sub>2</sub> | 5,97 d, 5,96 d / 5,94 d, 5,93d                |                                   | 10                      |
| 105,1 / 105,0         | CH              | 6,18 s / 6,28 s                               | 6,18 s, 4,41 d / 6,28 s, 4,32 d   | 2', 6'                  |
| 107,4 / 107,6         | CH              | 6,73 s / 6,71 s                               | 6,47 s / 6,55 s                   | 6                       |
| 109,7 / 109,4         | CH              | 6,60 s / 6,56 s                               | 4,41 d / (4,32 d)                 | 3                       |
| 126,4 / 125,6         | C               |                                               | 6,60 s, 4,41 d / 6,56 s, (4,32 d) | 1                       |
| 127,5 / 129,5         | CH              | 6,47 s / 6,55 s                               | 6,73 s, 5,27 d / 6,71 s, (5,25 d) | 7                       |
| 128,6 / 129,2         | C               |                                               | 6,73 s, 6,47 s / 6,71 s, 6,55 s   | 2                       |
| 129,2 / 129,5         | C               |                                               | 4,41 d, 3,23 d / 4,32 d, 3,63 d   | 8                       |
| 137,2 / 137,2         | C               |                                               | 6,18 s, 3,77 s / 6,28 s           | 4'                      |
| 137,8 / 138,0         | C               |                                               | 4,41 d, 3,23 d / 4,32 d           | 1'                      |
| 147,0 / 146,9         | C               |                                               | 6,60 s, 5,97 d, 5,96 d / 6,56 s   | 5                       |
| 148,0 / 148,0         | C               |                                               | 6,73 s / 6,71 s                   | 4                       |
| 153,1 / 153,1         | C               |                                               | 6,18 s, 3,73 s / 6,28 s, 3,76 s   | 3', 5'                  |
| 170,9 / 170,4         | C               |                                               | 3,48 d, 3,45 s / 3,61 d, 3,41 s   | 3''                     |
| 172,3 / 172,0         | C               |                                               | 3,66 s, 3,23 d / 3,61 s, 3,63 d   | 9'                      |

\* Carbon type according to DEPT experiment

**Table S16.** Correlations and assignments for compound **32** ( $\delta$  in ppm):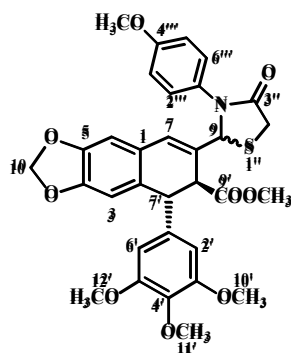

| $\delta^{13}\text{C}$ | TYPE*           | HMQC, $\delta^1\text{H}$<br>( <i>J</i> in Hz) | HMBC, $\delta^1\text{H}$                           | Assigned                |
|-----------------------|-----------------|-----------------------------------------------|----------------------------------------------------|-------------------------|
| 32,7 / 33,1           | CH <sub>2</sub> | 3,60 s / 3,48 s                               |                                                    | 2''                     |
| 46,8 / 47,7           | CH              | 4,42 d / 4,31 d                               | 6,55 s, 6,07 s, 3,43 d / 6,18 s                    | 7'                      |
| 48,6 / 49,2           | CH              | 3,43 d / 3,52 sa                              | 6,40 s, 5,65 s, 4,42 d / 6,52 s                    | 8'                      |
| 52,4 / 52,4           | CH <sub>3</sub> | 3,65 s / 3,53 s                               |                                                    | 9'-OCH <sub>3</sub>     |
| 55,3 / 55,4           | CH <sub>3</sub> | 3,79 s / 3,80 s                               |                                                    | 4'''-OCH <sub>3</sub>   |
| 55,9 / 56,0           | CH <sub>3</sub> | 3,66 s / 3,71 s                               |                                                    | 3', 5'-OCH <sub>3</sub> |
| 60,8 / 60,8           | CH <sub>3</sub> | 3,80 s / 3,81 s                               |                                                    | 4'-OCH <sub>3</sub>     |
| 66,7 / 66,7           | CH              | 5,65 s / 5, 53 s                              | 6,40 s / 6,52 s                                    | 9                       |
| 101,2 / 101,2         | CH <sub>2</sub> | 5,93 d, 5,92 d / 5,93 d, 5,92 d               |                                                    | 10                      |
| 104,9 / 104,9         | CH              | 6,07 s / 6,18 s                               | 6,07 s, 4,42 d / 6,18 s, (4,31 d)                  | 2', 6'                  |
| 107,5 / 107,5         | CH              | 6,64 s / 6,66s                                | 6,40 s / (6,52 s)                                  | 6                       |
| 109,6 / 109,6         | CH              | 6,55 s / 6,51 s                               | 4,42 d                                             | 3                       |
| 114,1 / 114,1         | CH              | 6,75 d / 6,86 d                               | 6,75 d / 6,86 d                                    | 3''', 5'''              |
| 125,1 / 125,1         | CH              | 6,99 d / 7,12 d                               | 6,99 d / 7,12 d                                    | 2''', 6'''              |
| 126,0 / 126,0         | C               |                                               | 6,55 s, 4,42 d                                     | 1                       |
| 126,9 / 128,7         | CH              | 6,40 s / 6,52 s                               | 6,64 s, 5,65 s, 3,43 d / 6,66 s                    | 7                       |
| 128,7 / 128,7         | C               |                                               | 6,40 s, 3,43 d / 6,52 s                            | 2                       |
| 129,2 / 129,2         | C               |                                               | 4,42 d, 3,43 d                                     | 8                       |
| 130,1 / 130,9         | C               |                                               | 6,75 d / 6,86 d                                    | 1'''                    |
| 136,9 / 136,9         | C               |                                               | 6,07 s, 3,80 s / 6,18 s, (3,81 s)                  | 4'                      |
| 138,1 / 138,1         | C               |                                               | 4,42 d, 3,43 d / 4,31 d                            | 1'                      |
| 146,9 / 146,9         | C               |                                               | 6,55 s / 6,51s                                     | 5                       |
| 148,0 / 148,0         | C               |                                               | 6,64 s, 5,93 d, 5,92 d                             | 4                       |
| 153,0 / 153,0         | C               |                                               | 6,07 s, 3,66 s / 6,18 s, 3,71 s                    | 3', 5'                  |
| 157,7 / 157,7         | C               |                                               | 6,99 d, 6,75 d, 3,79 s /<br>7,12 d, 6,86 d, 3,80 s | 4'''                    |
| 170,9 / 170,9         | C               |                                               | 5,65 s                                             | 3''                     |
| 172,6 / 171,9         | C               |                                               | 4,42 d, 3,65 s, 3,43 d /<br>3,53 s, 3,52 sa        | 9'                      |

\* Carbon type according to DEPT experiment

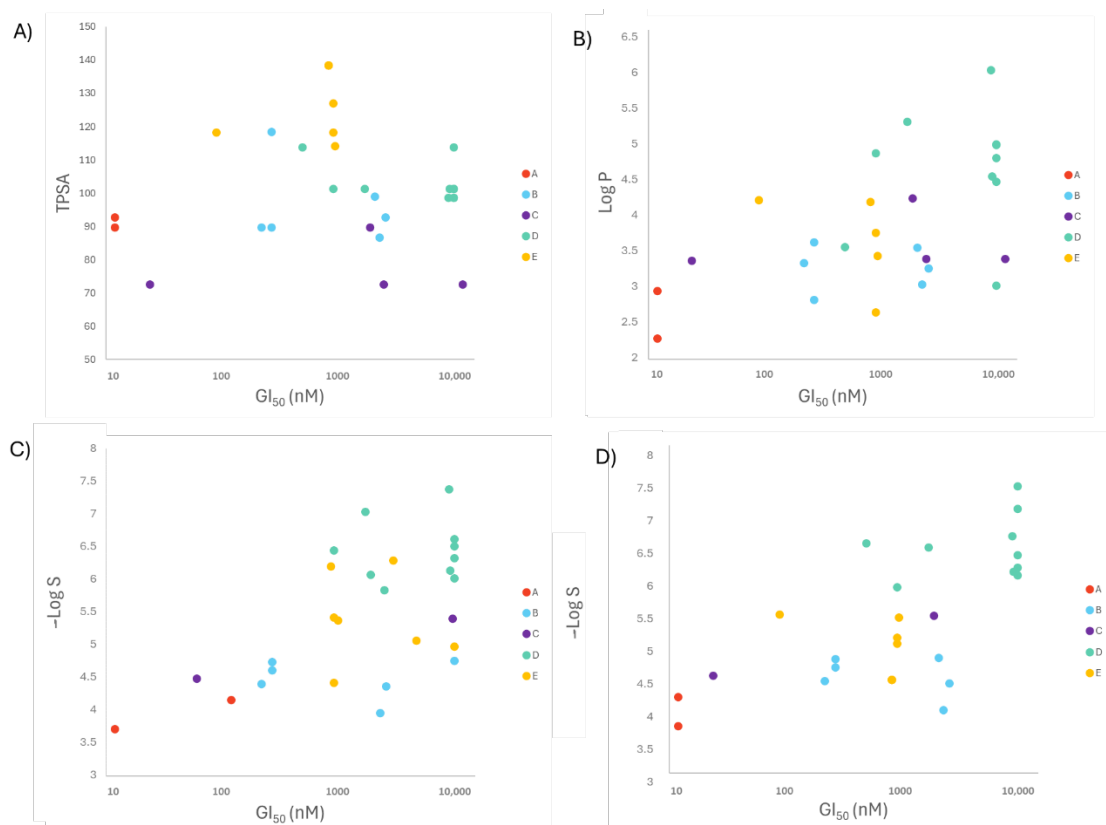

**Figure S1:** Graphical representation of the Log P, TPSA and Log S values of the synthesized compounds, calculated by Swissadme.

A) and B) TPSA and Log P values respectively, plotted with the cytotoxicity values of the compounds in A549 (expressed in nanomolar). C) and D) Log S plotted with the cytotoxicity values of the compounds in A549 and HT-29 respectively (expressed in nanomolar). Color code for the different subfamilies of compounds synthesized in this work as it is in the manuscript.

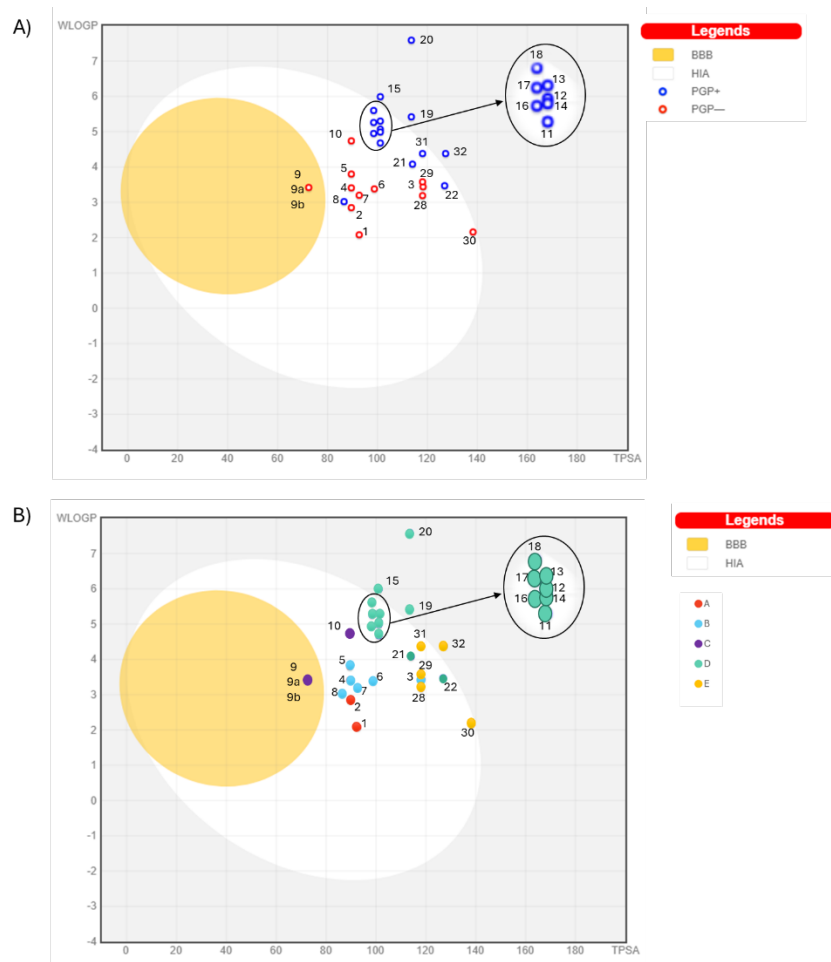

**Figure S2:** BOILED-Egg model obtained in Swissadme.

Yellow region indicates the compounds that are predicted to passively permeate through the blood-brain barrier (BBB). White region indicates a high intestinal absorption (HIA). In panel A, red points refer to compounds that are not predicted to be substrate of P-glycoprotein and blue points compound predicted to be substrate of P-glycoprotein. In panel B, color code for the different subfamilies of compounds synthesized in this work as it is in the manuscript.



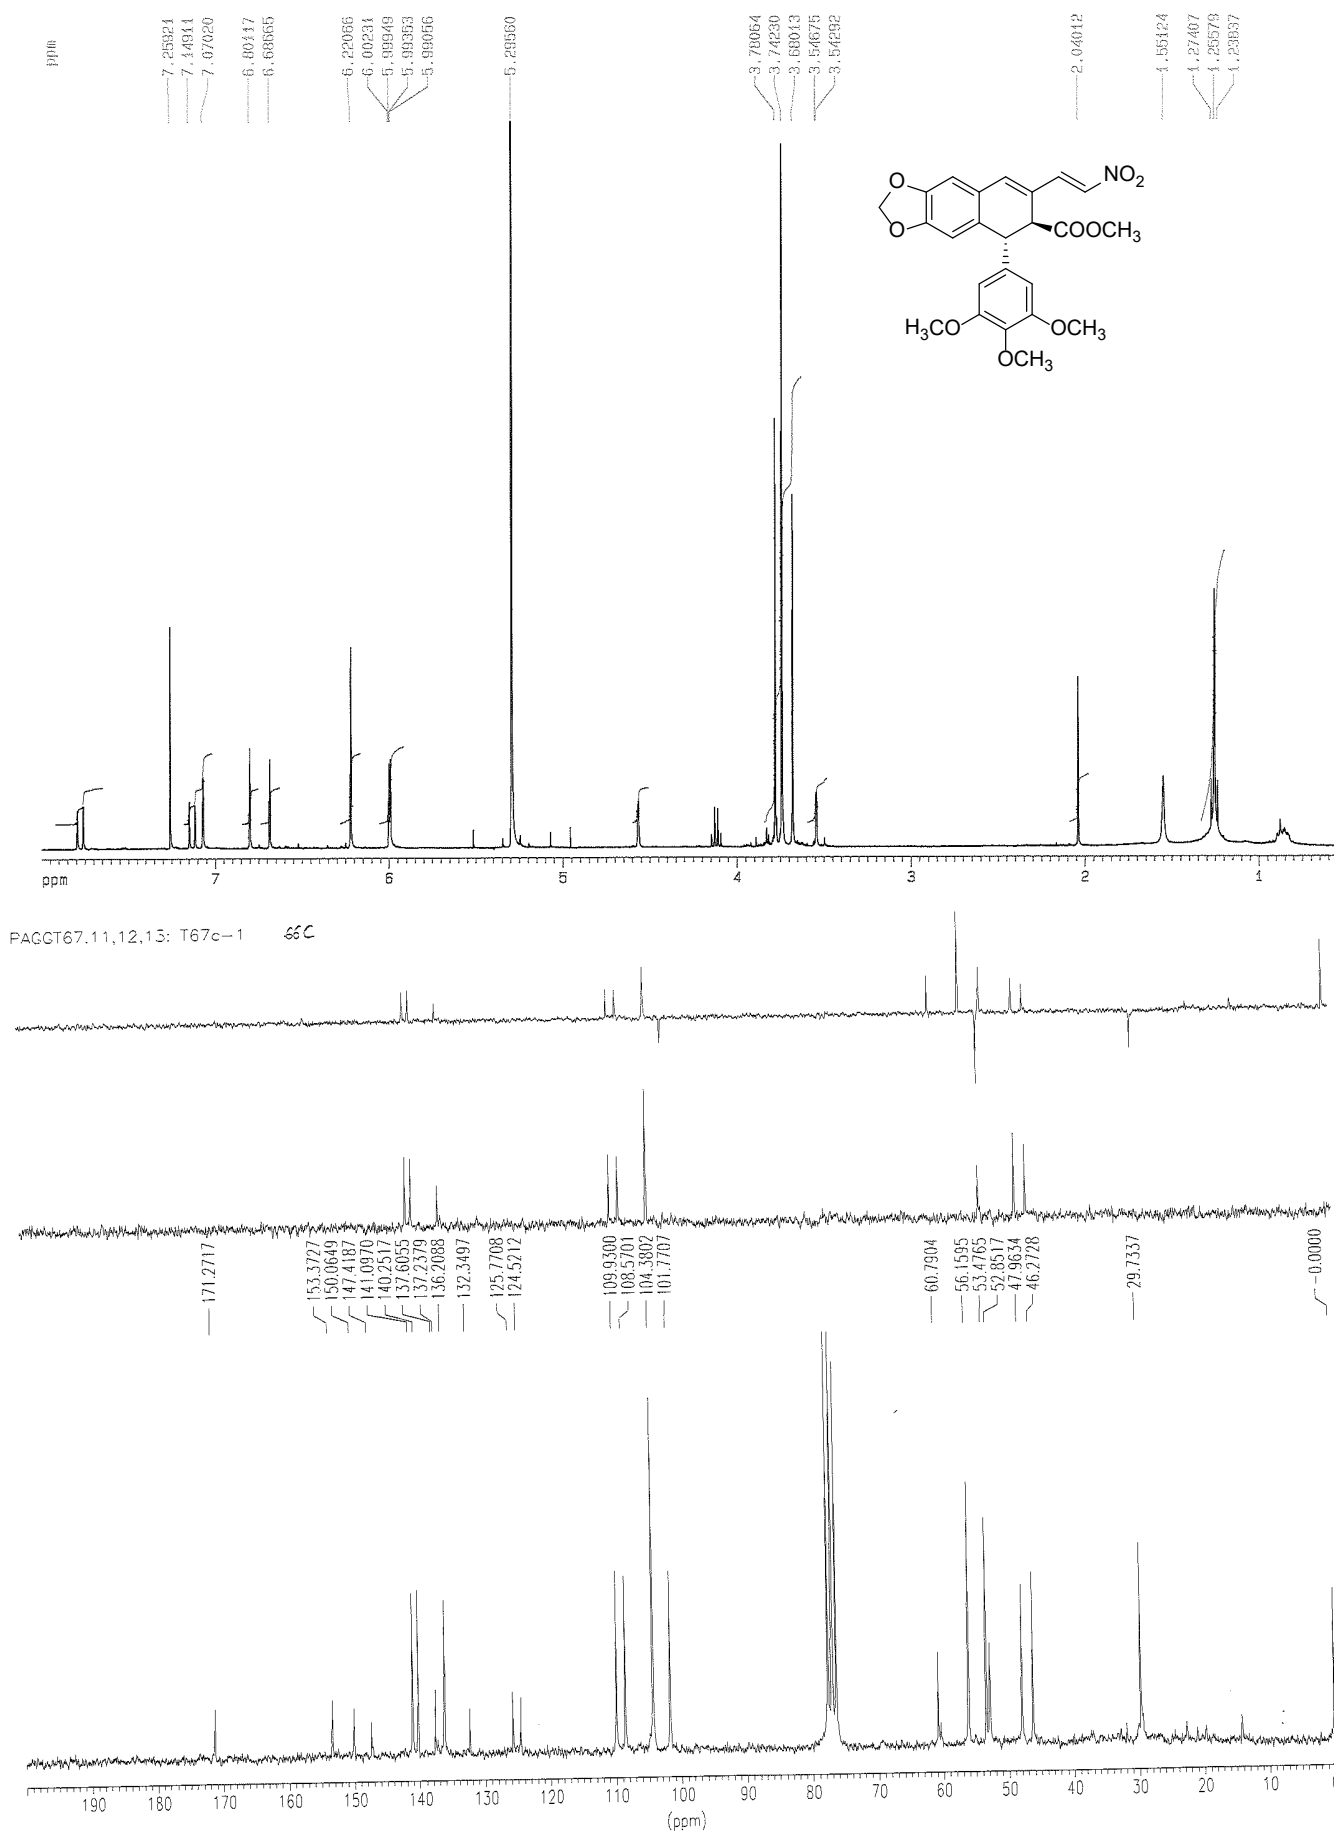

Pablo Garcia  
PAGG T67  
HMQC 145 Hz

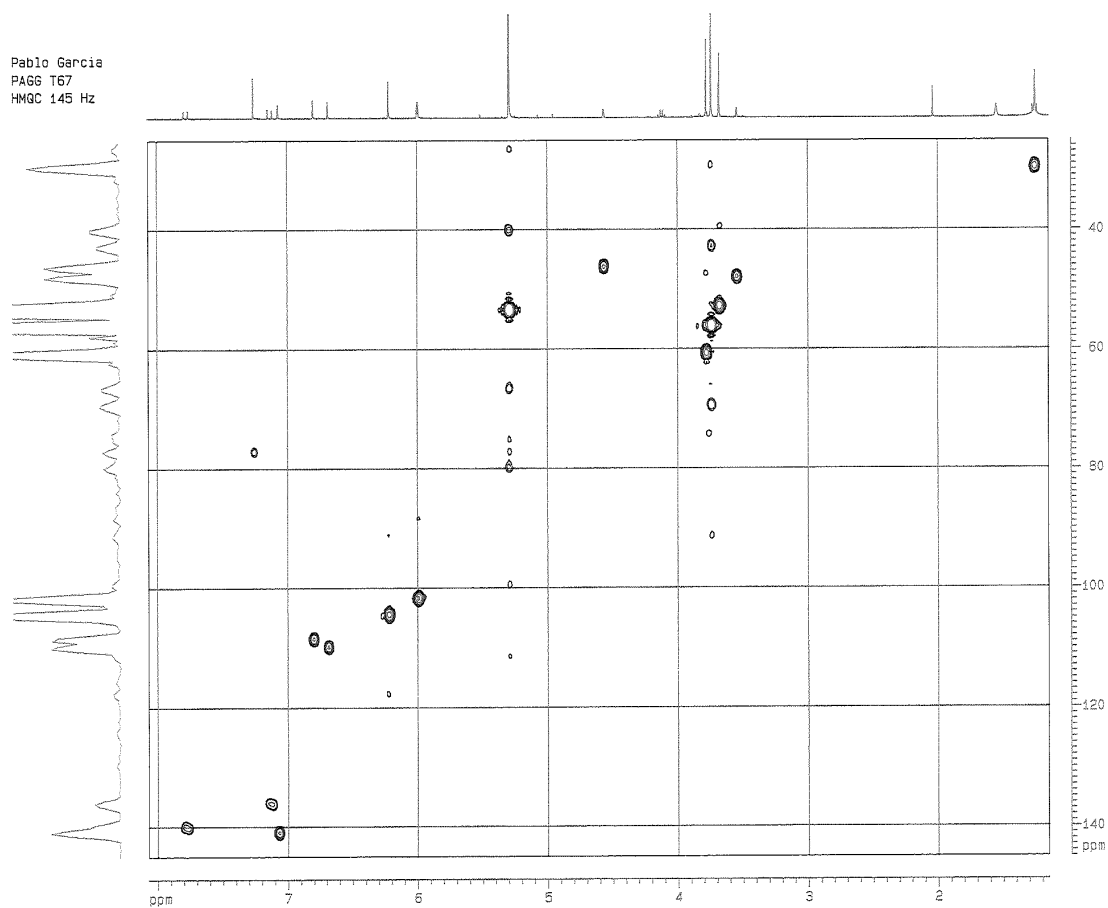

Pablo Garcia  
PAGG T67  
HMBC 50 ms

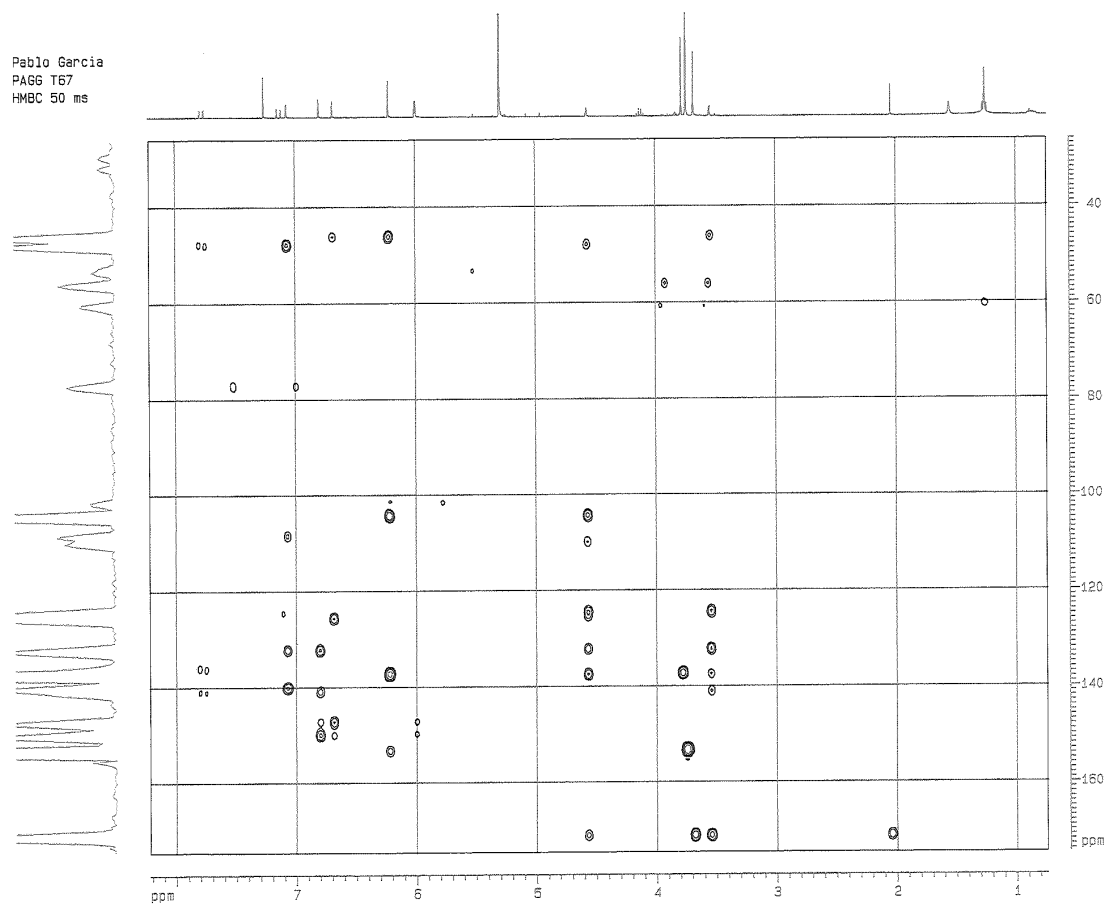

**Figure S4.** HMQC and HMBC for compound **3**.

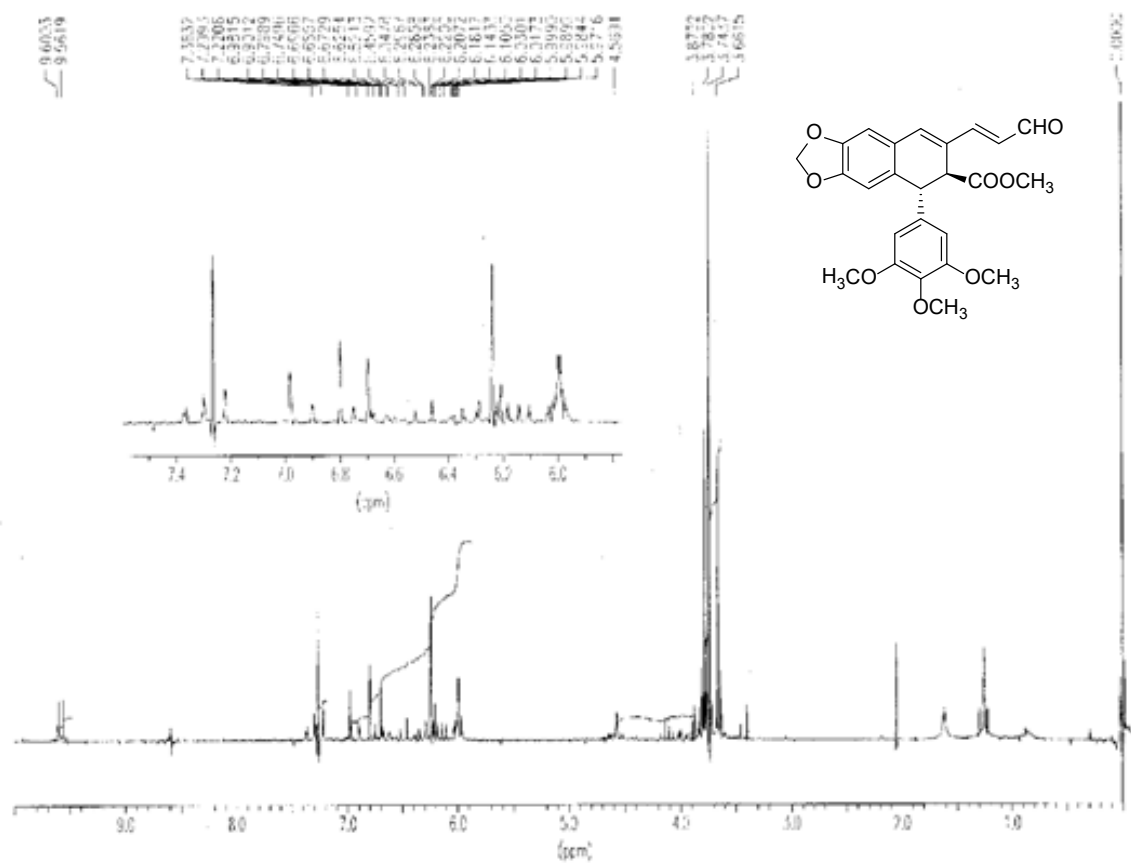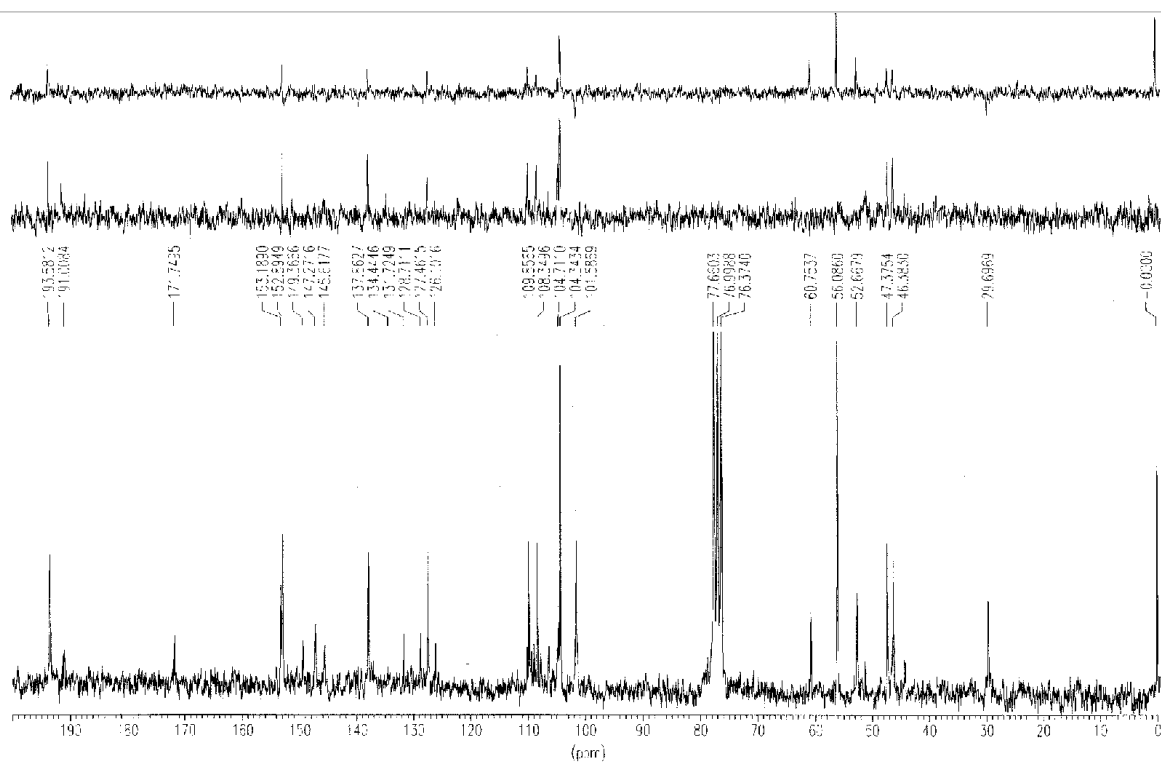

Figure S5. <sup>1</sup>H and <sup>13</sup>C for compound 4.

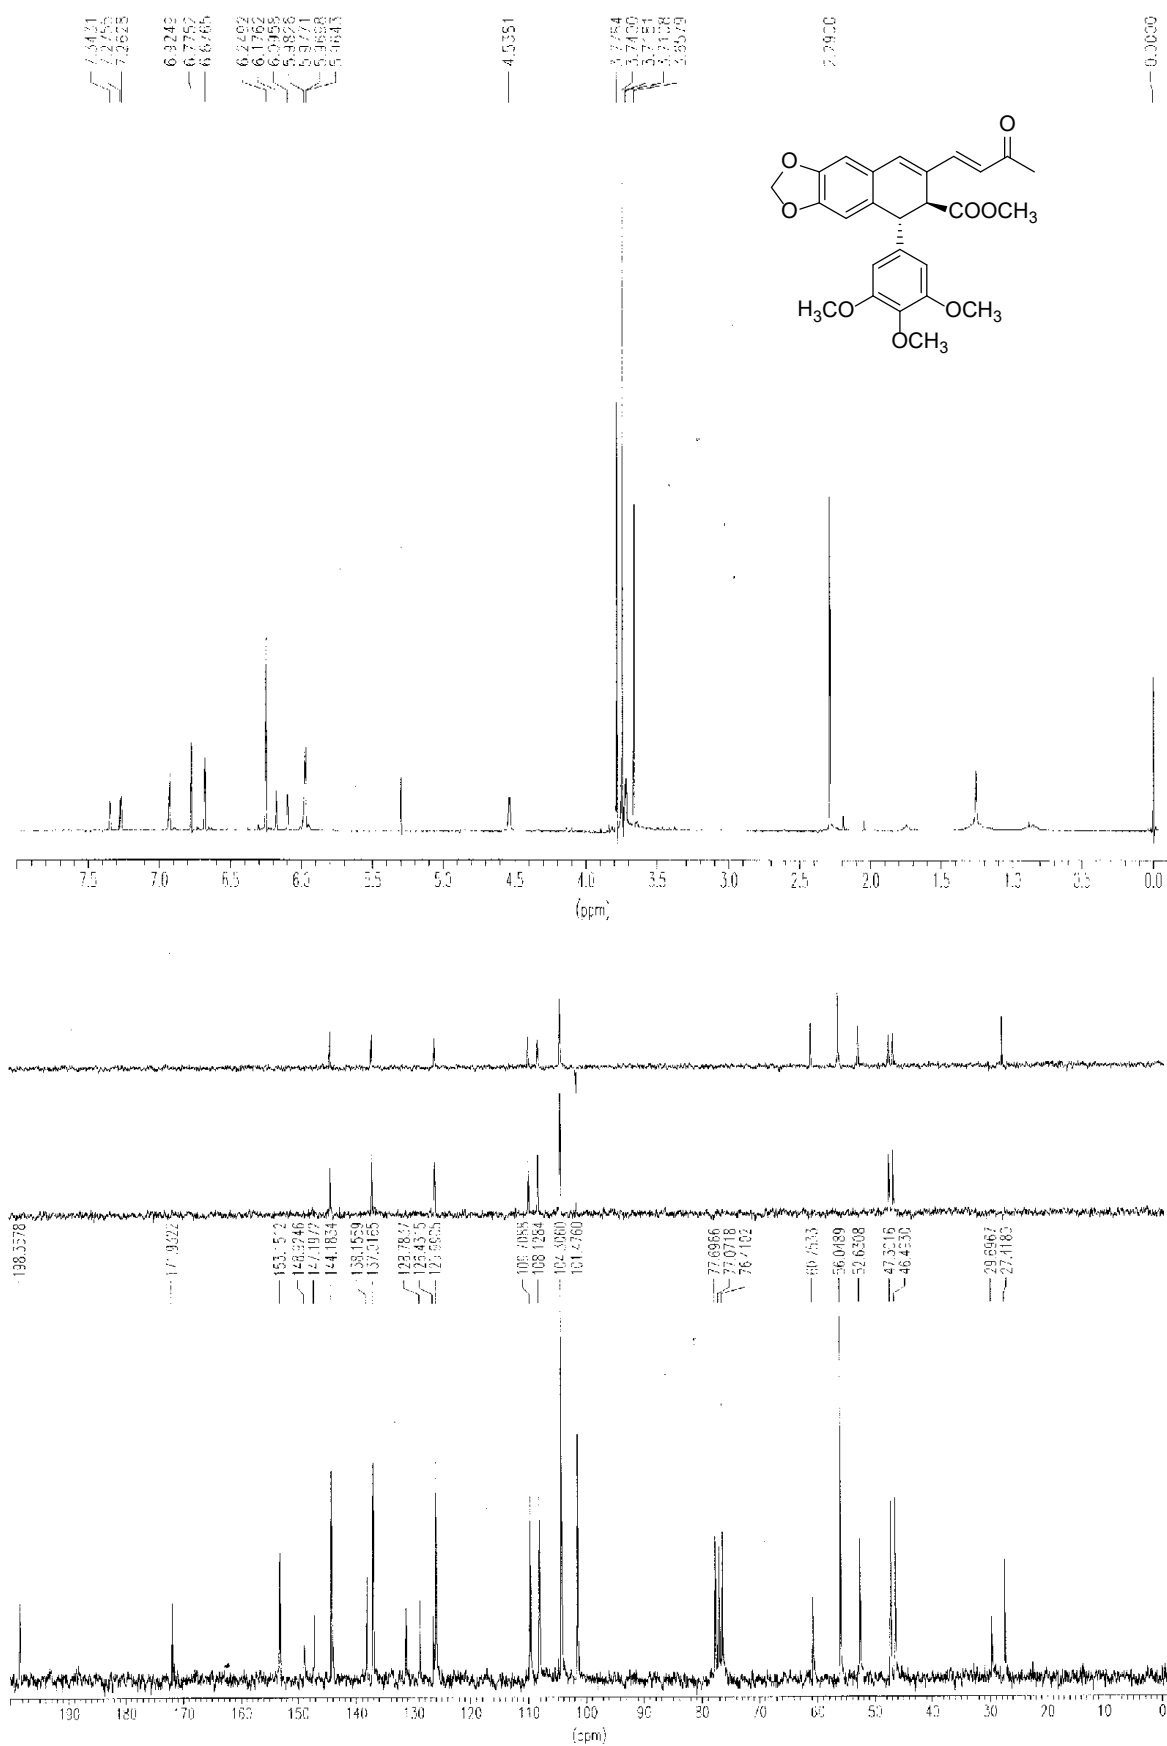

**Figure S6.** <sup>1</sup>H and <sup>13</sup>C for compound **5**.

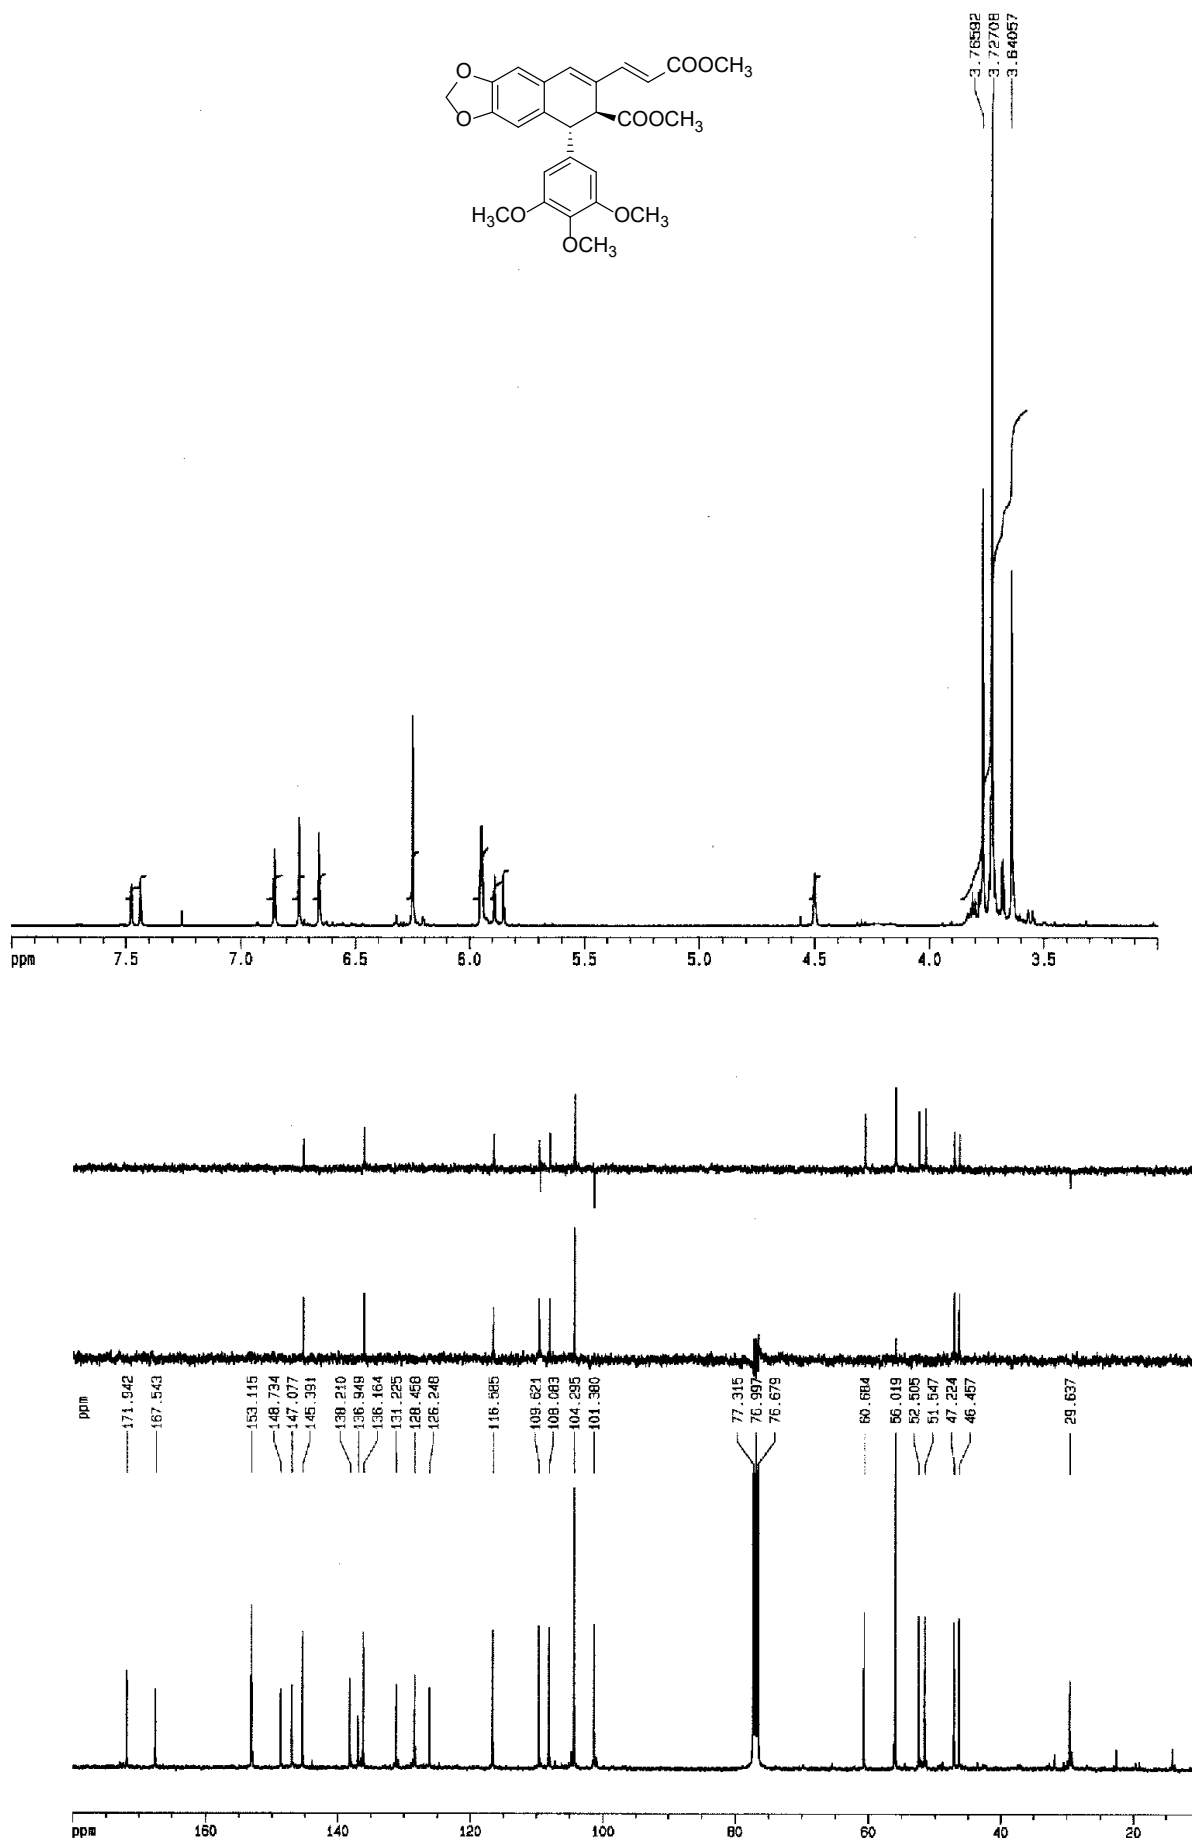

Figure S7.  $^1\text{H}$  and  $^{13}\text{C}$  for compound 6.

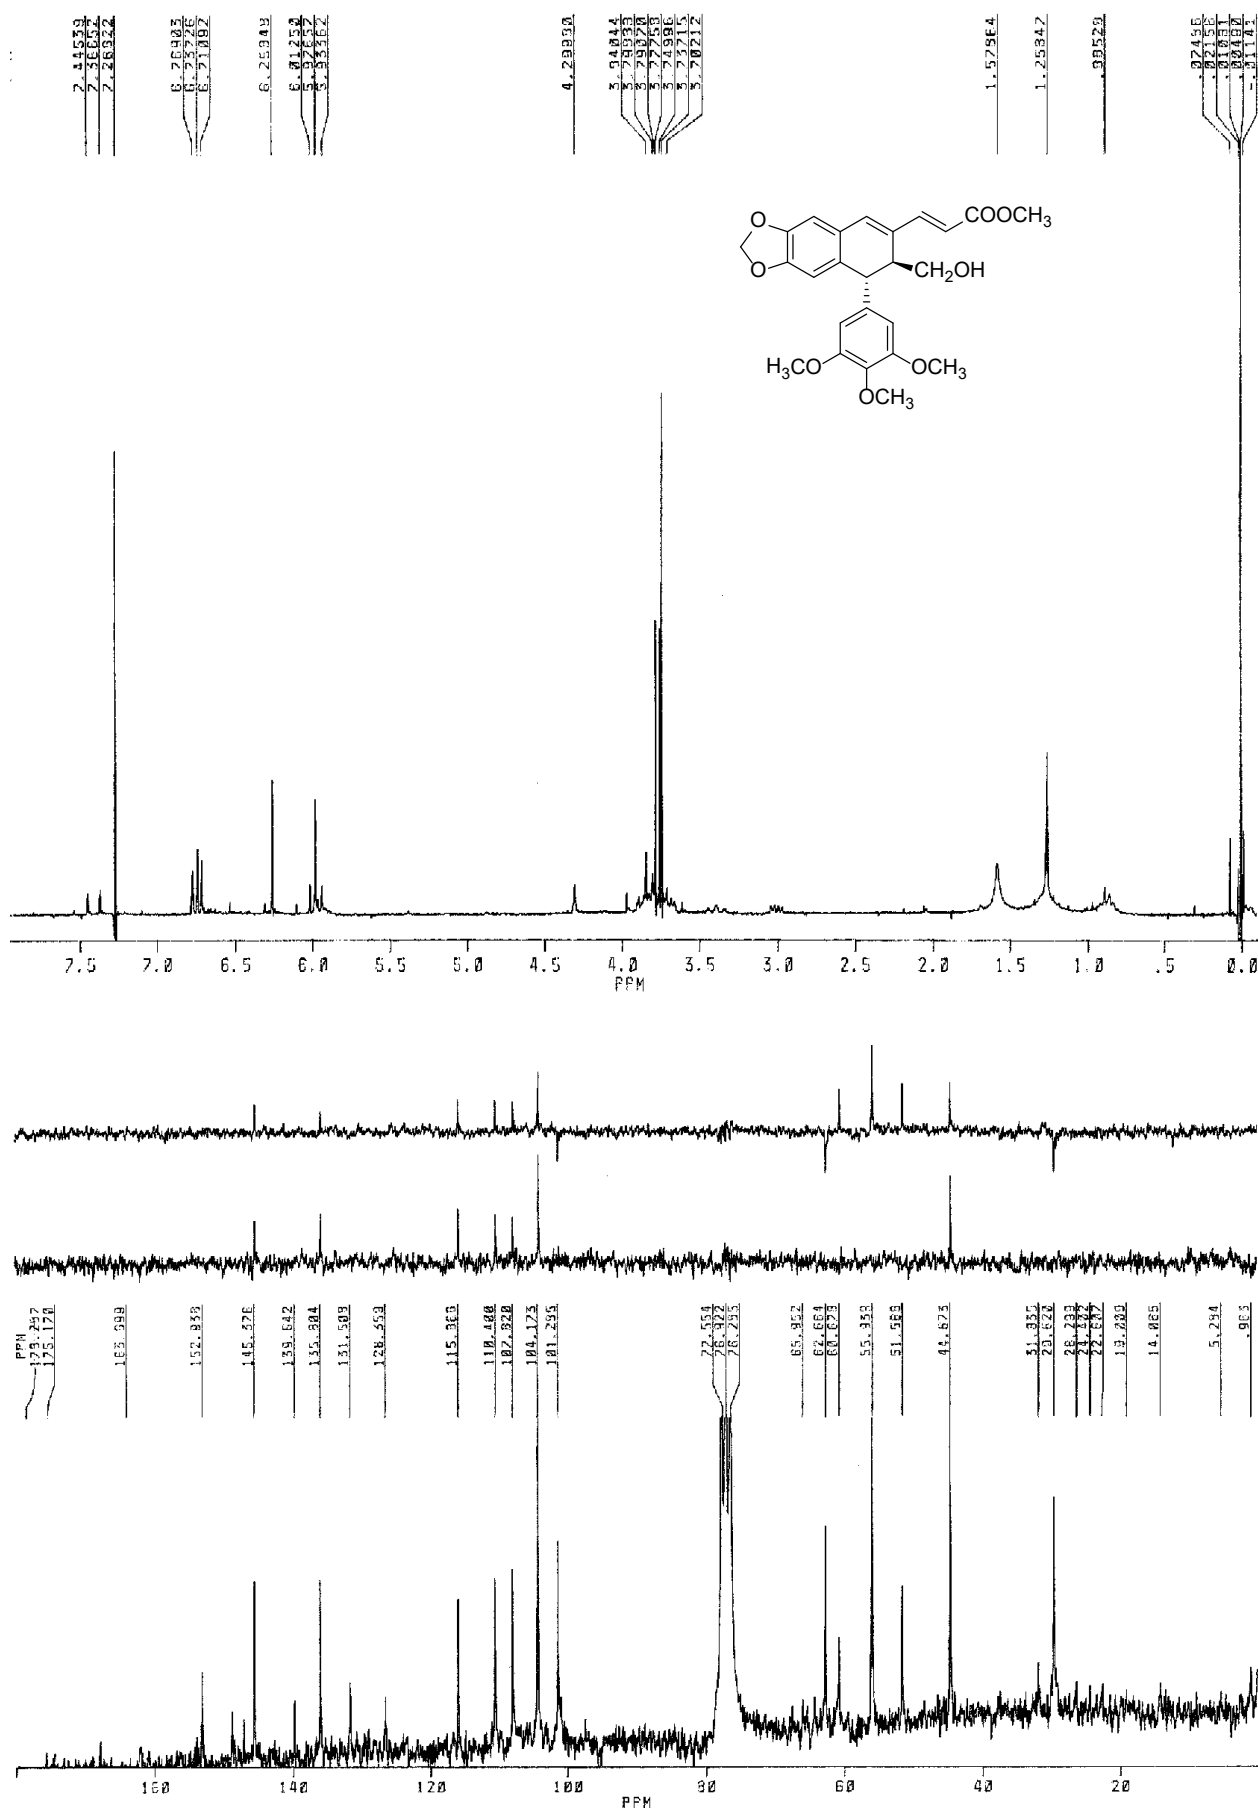

Figure S8. <sup>1</sup>H and <sup>13</sup>C for compound 7.

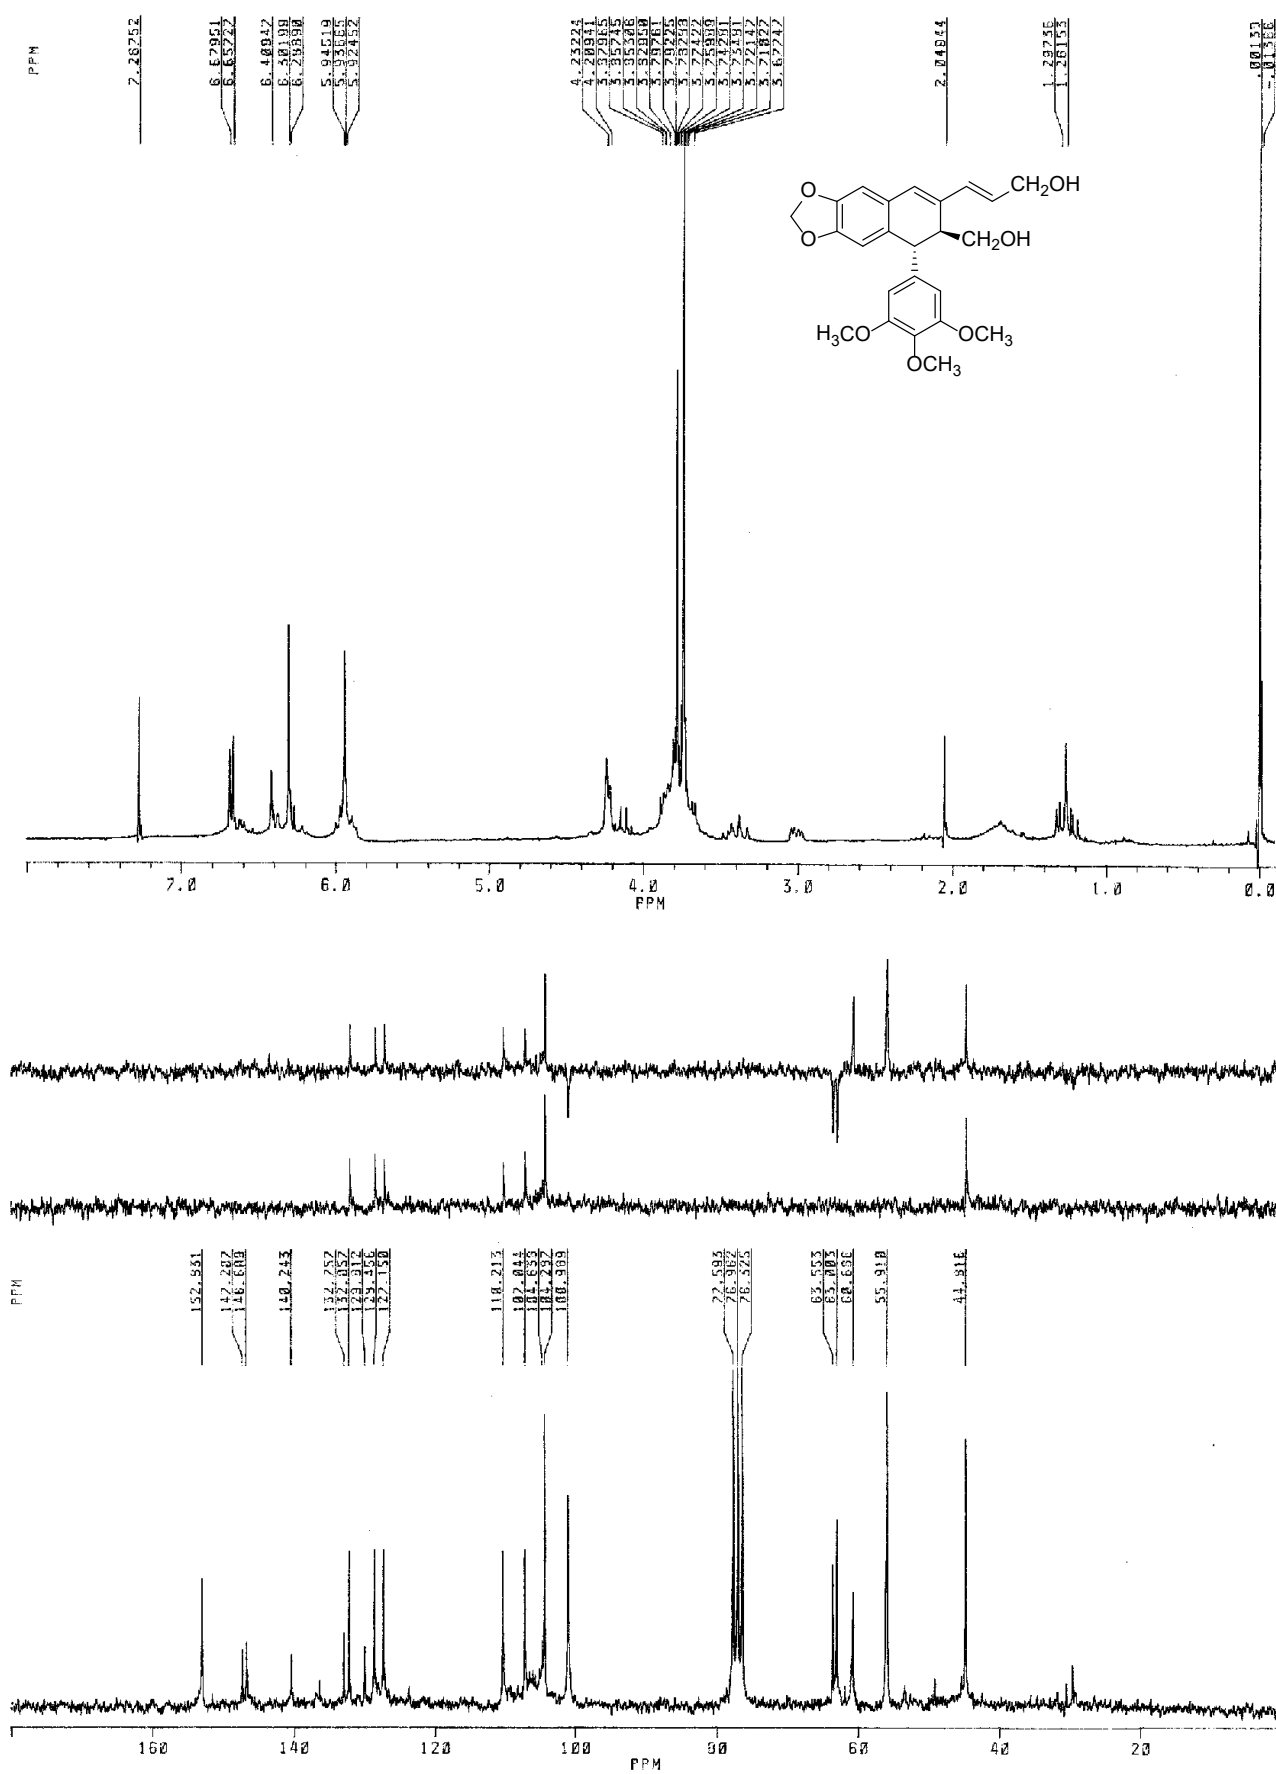

Figure S9. <sup>1</sup>H and <sup>13</sup>C for compound 8.

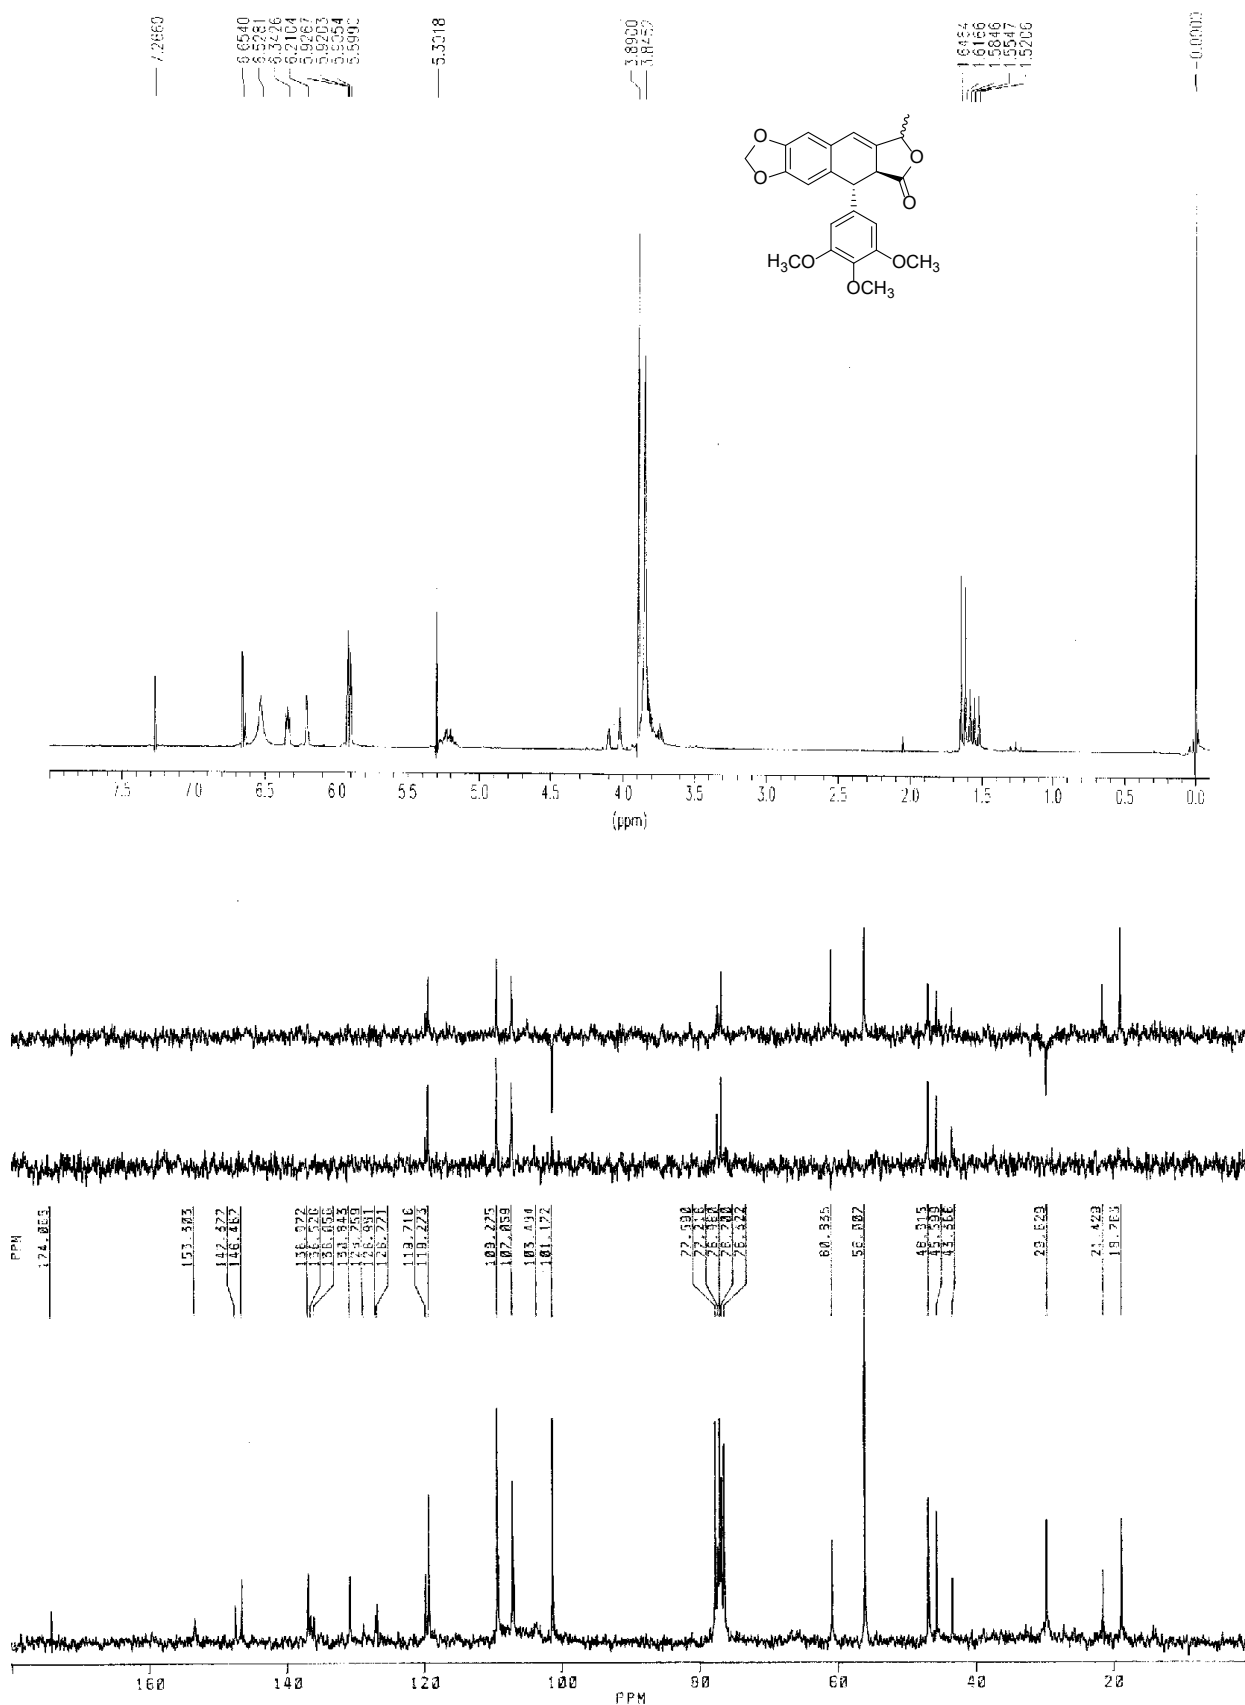

**Figure S10.**  $^1\text{H}$  and  $^{13}\text{C}$  for compound **9**



JOPAGA20.14: T20-C (0)

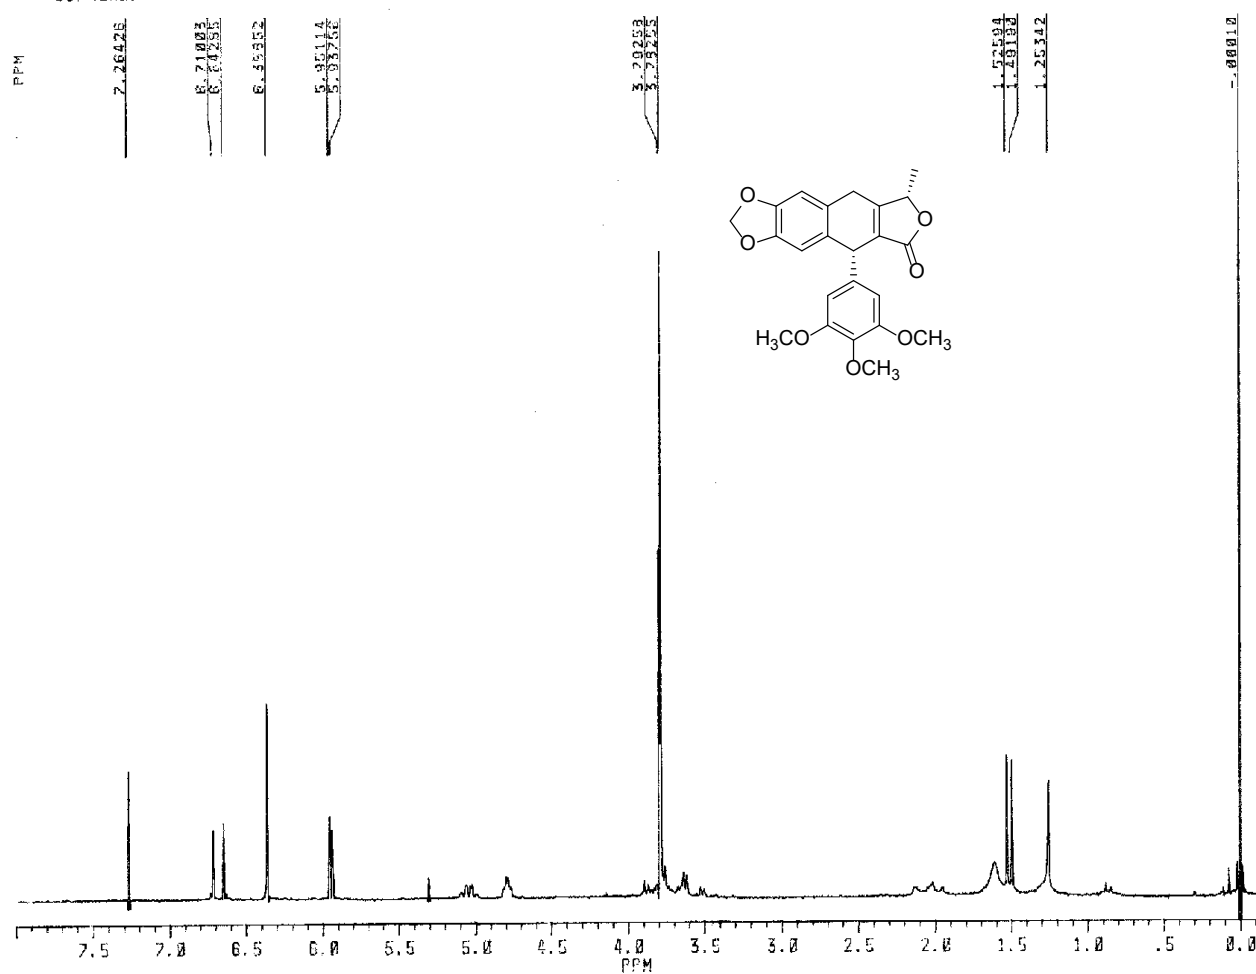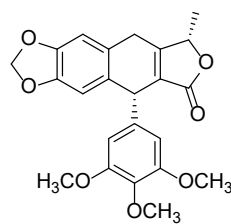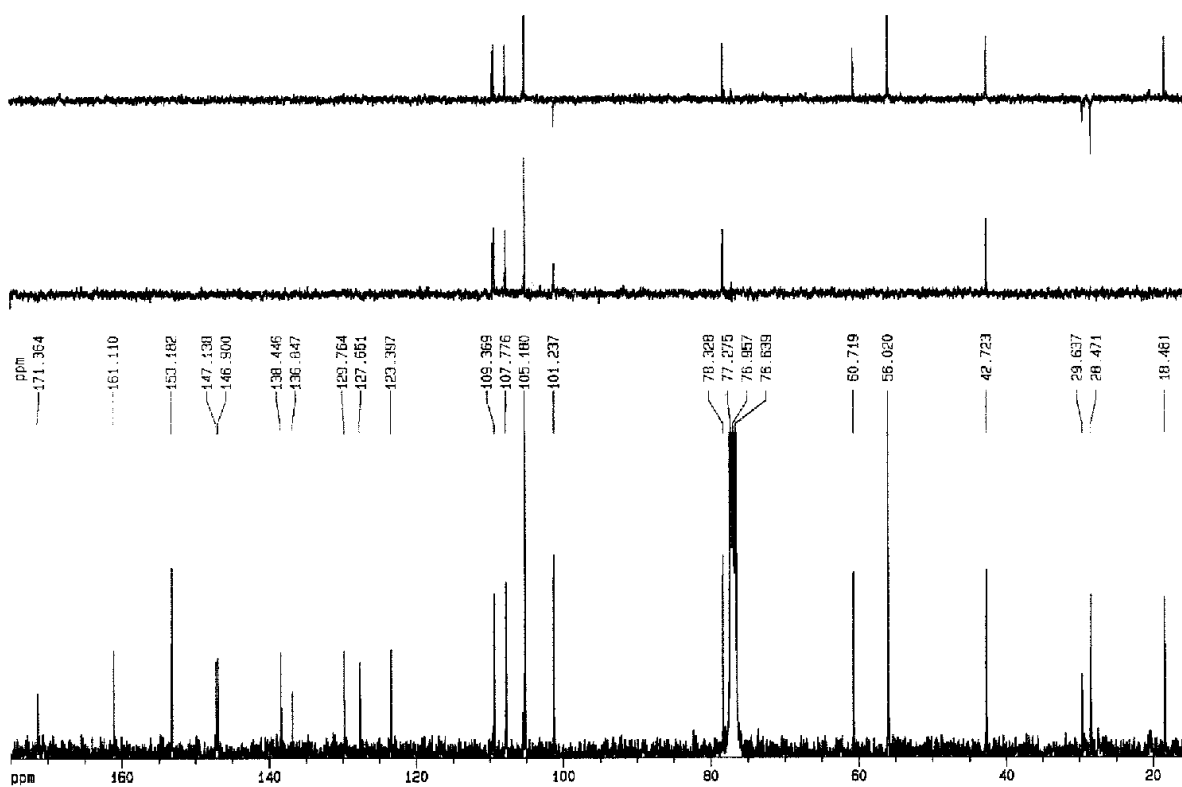

Figure S11. <sup>1</sup>H and <sup>13</sup>C for compound 9a

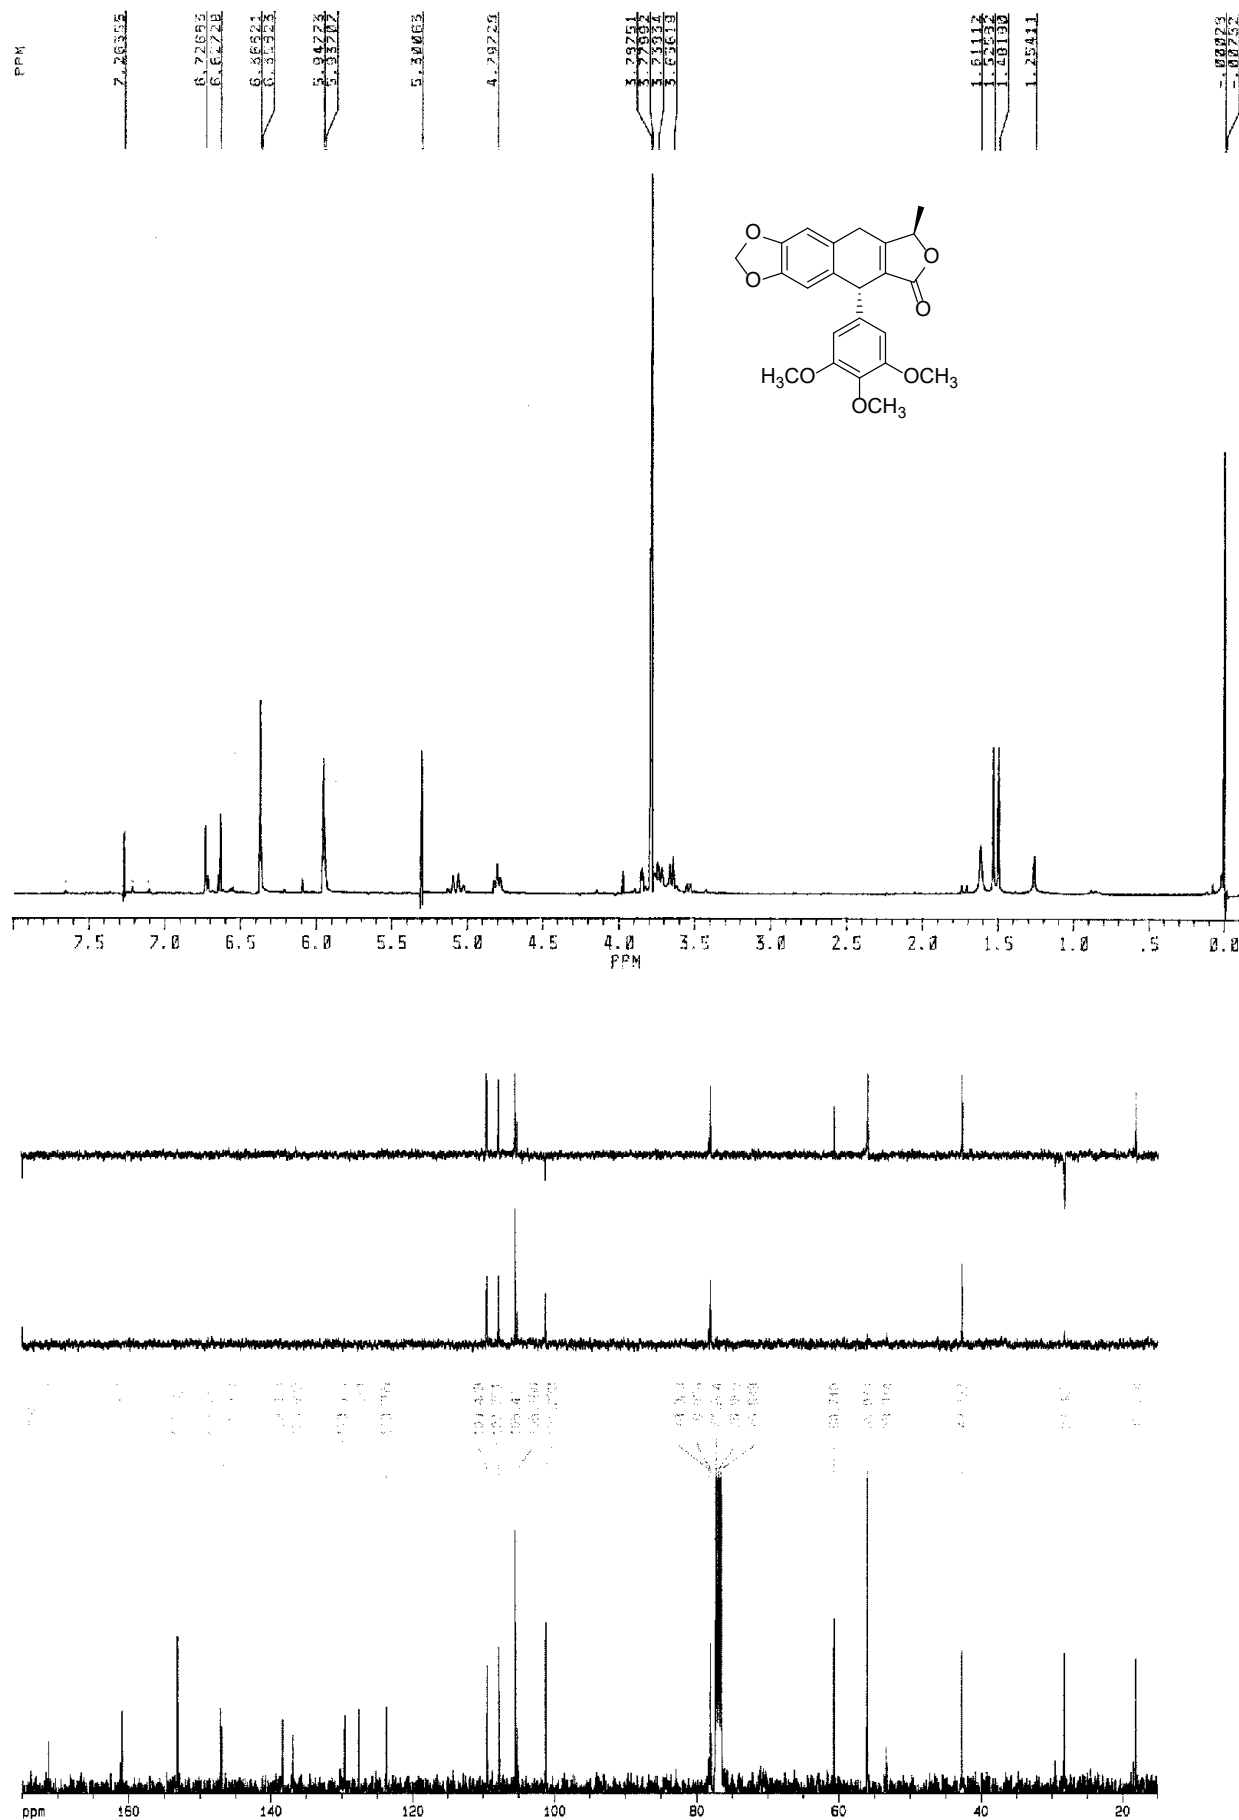

Figure S12. <sup>1</sup>H and <sup>13</sup>C for compound 9b

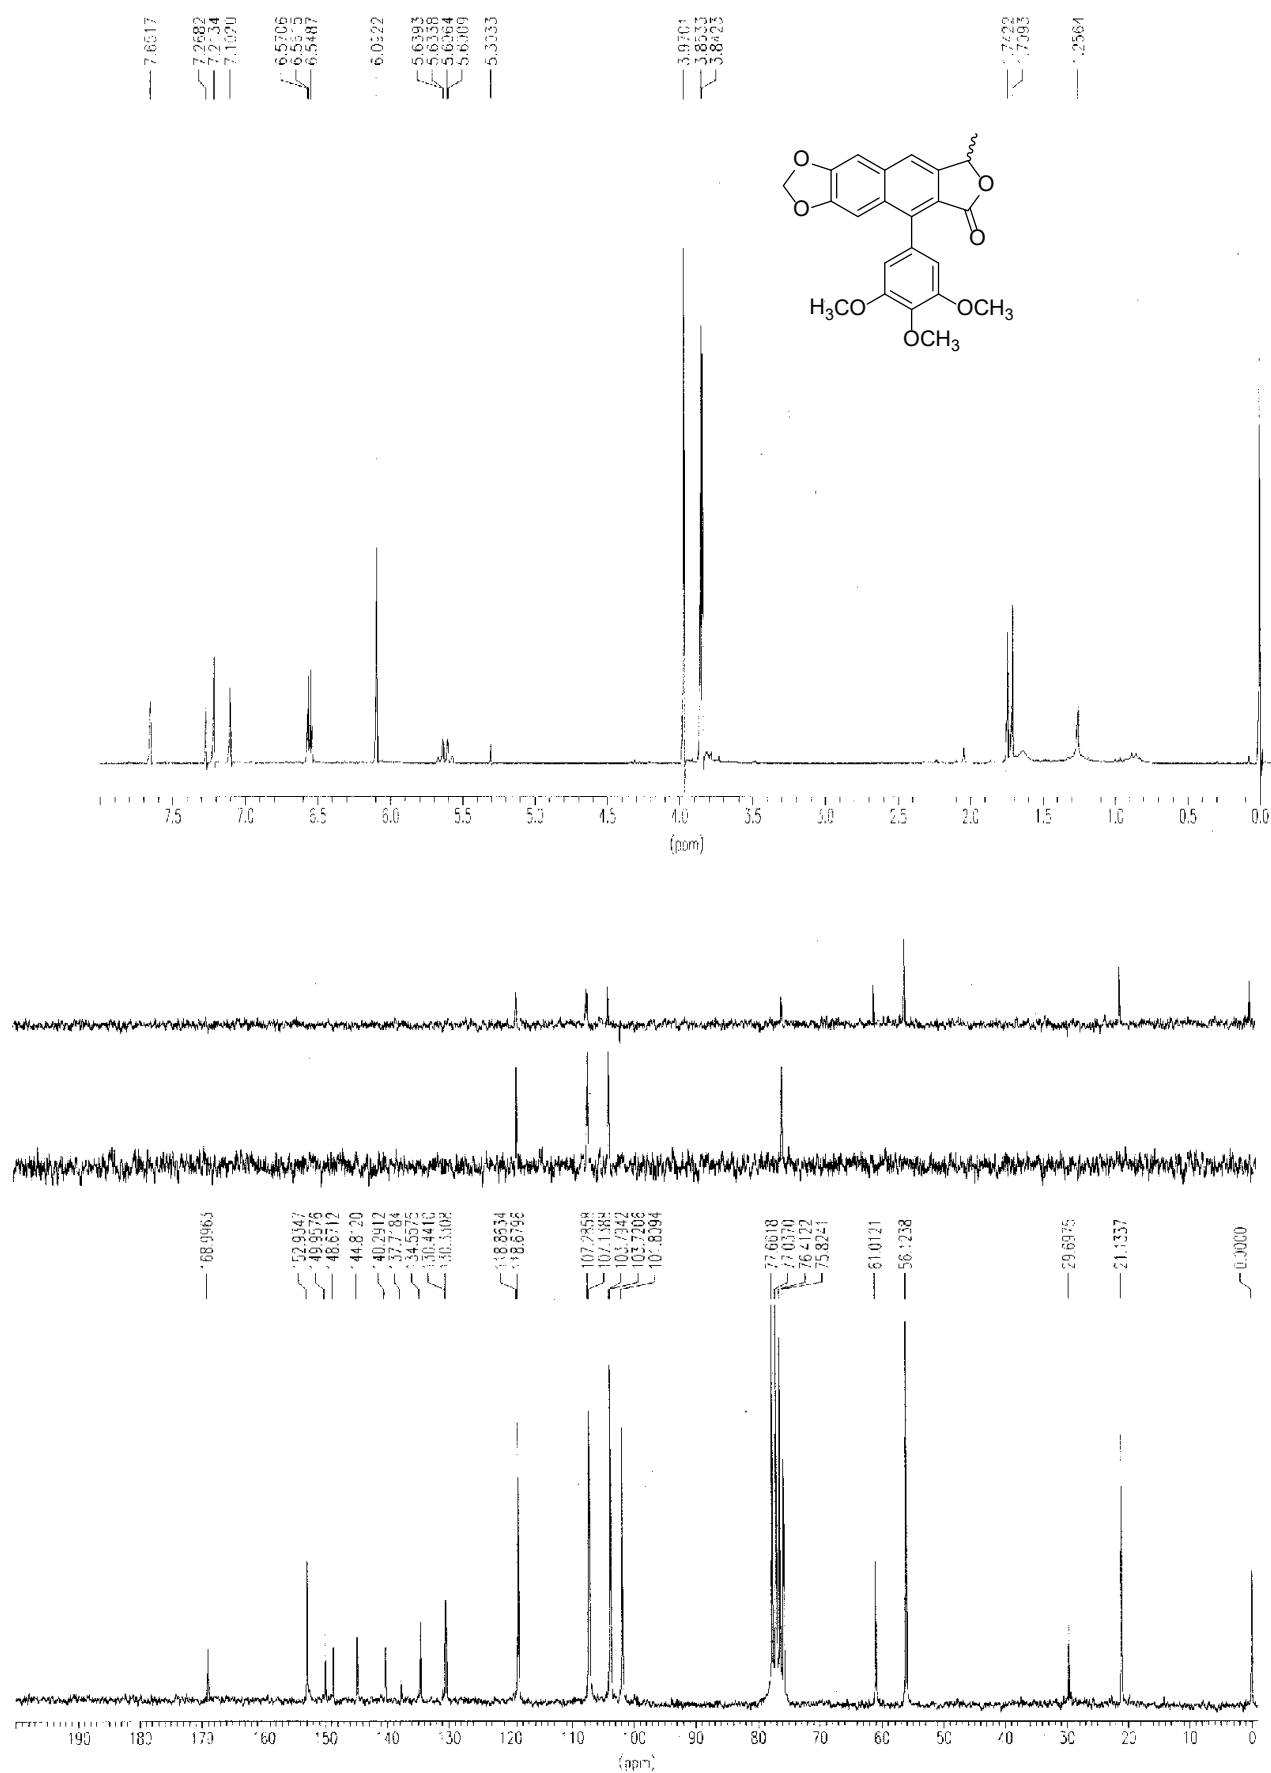

**Figure S13.** <sup>1</sup>H and <sup>13</sup>C for compound **9c**

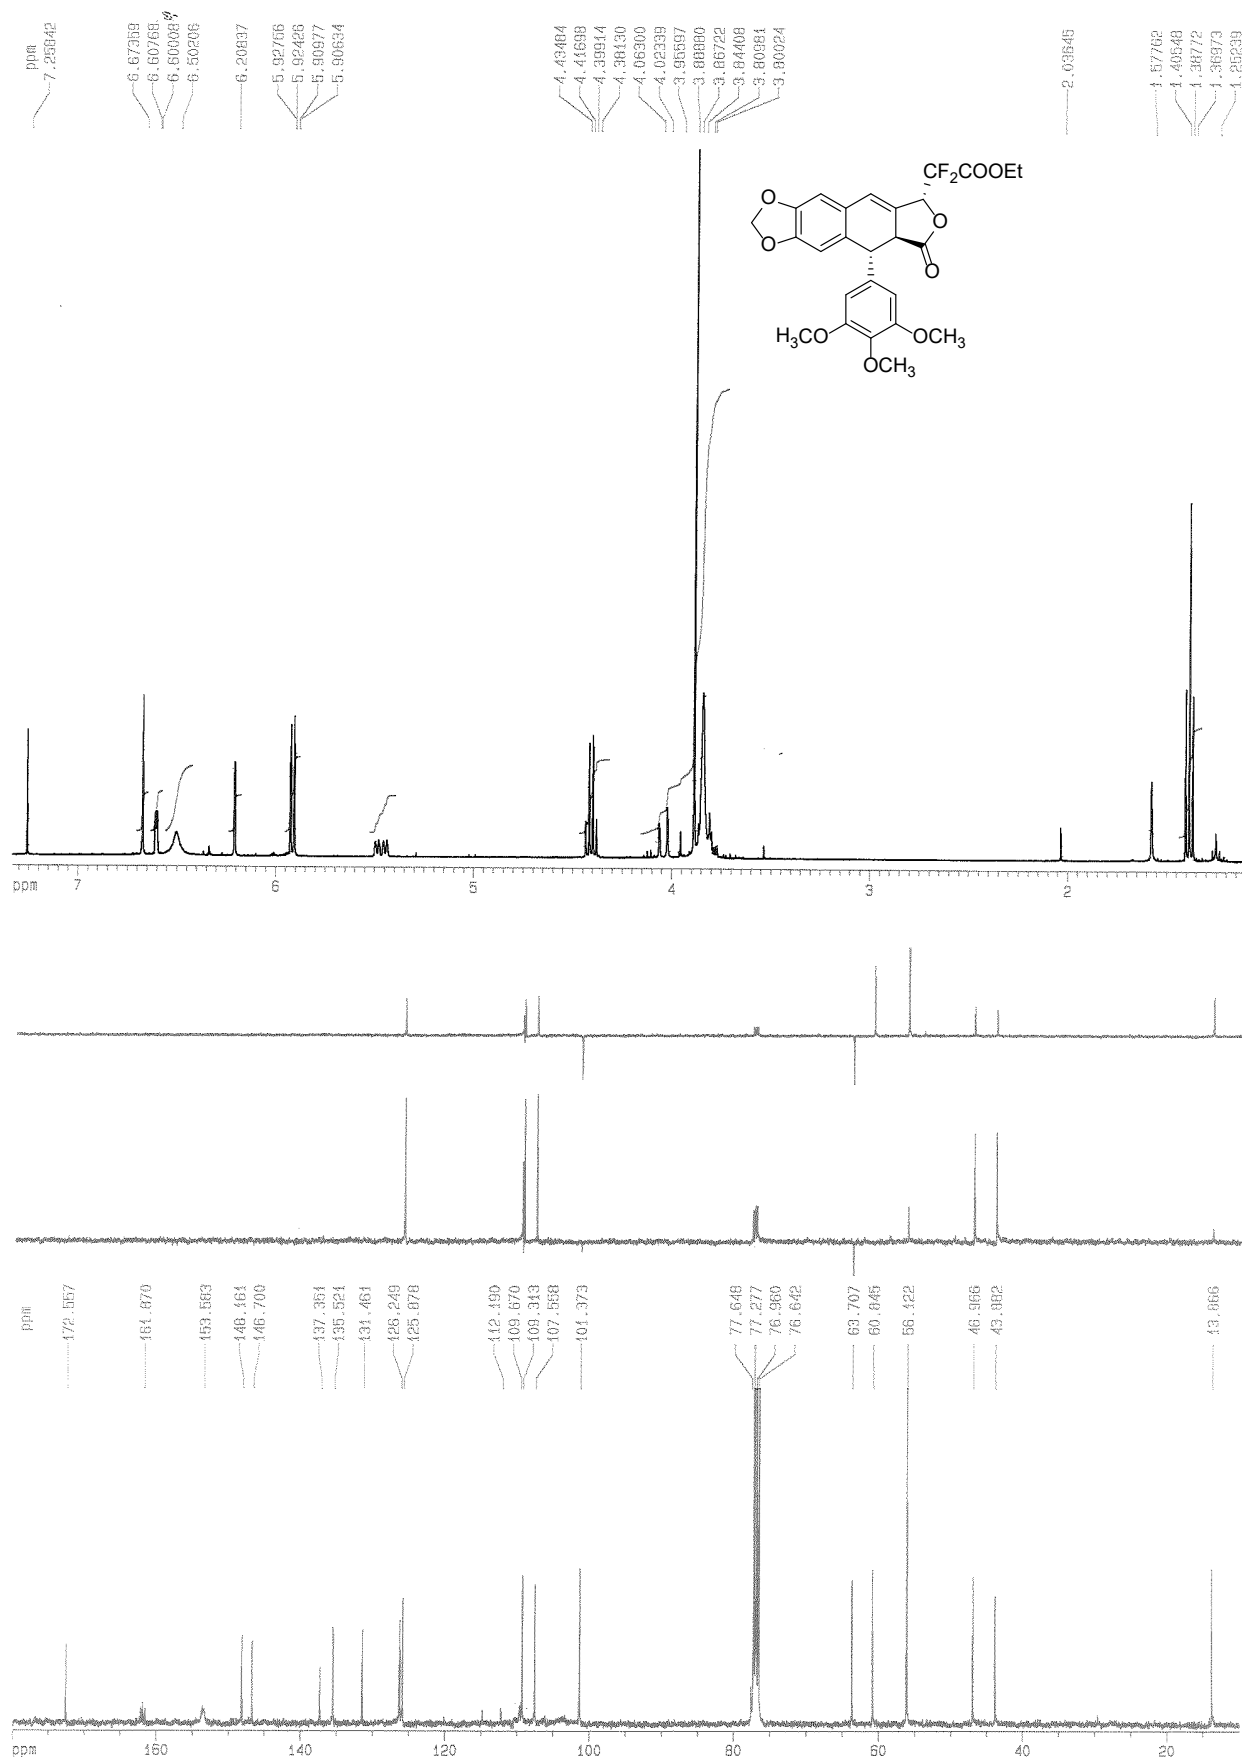

**Figure S14.** <sup>1</sup>H and <sup>13</sup>C for compound 10

T21B A1  
HMQC  
J=145 Hz  
JOSEMAR1

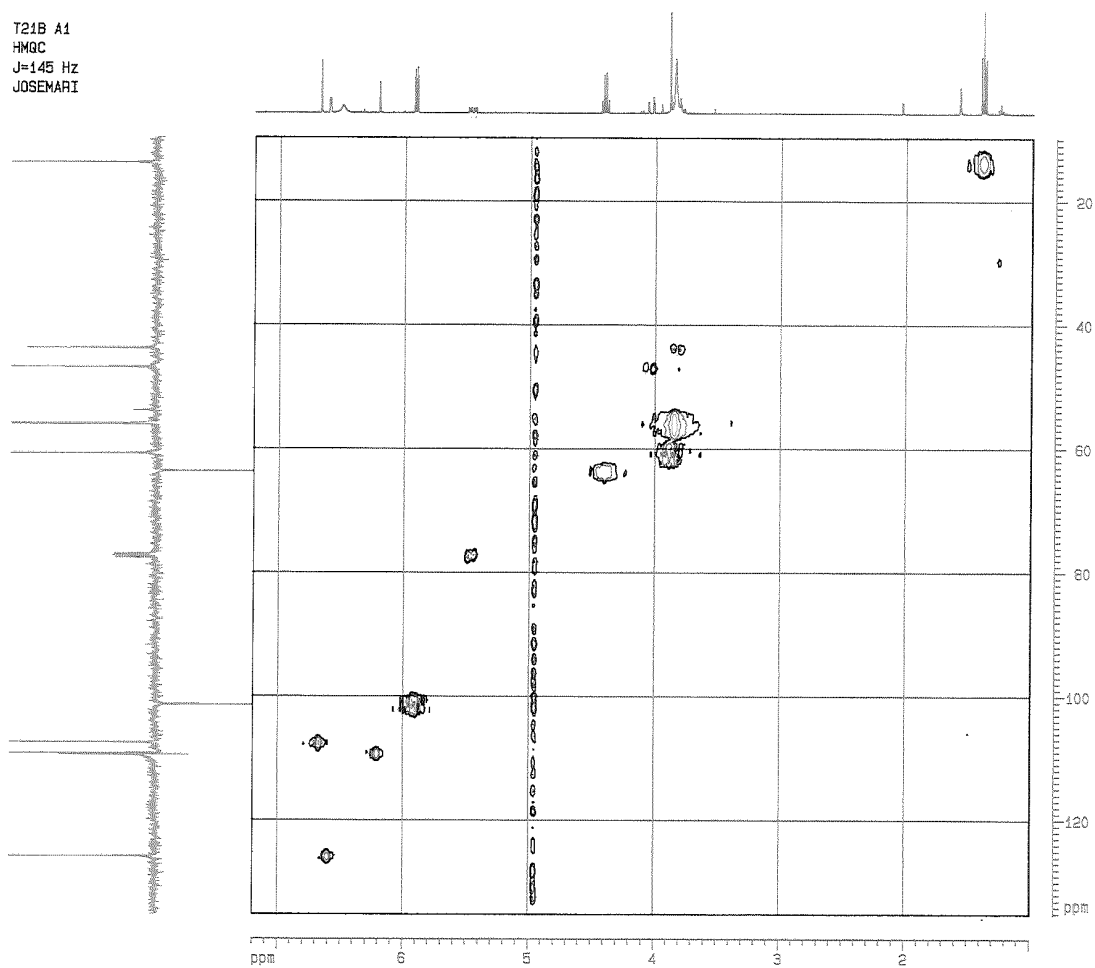

T21b A1  
HMBC 63 ms  
Josemari

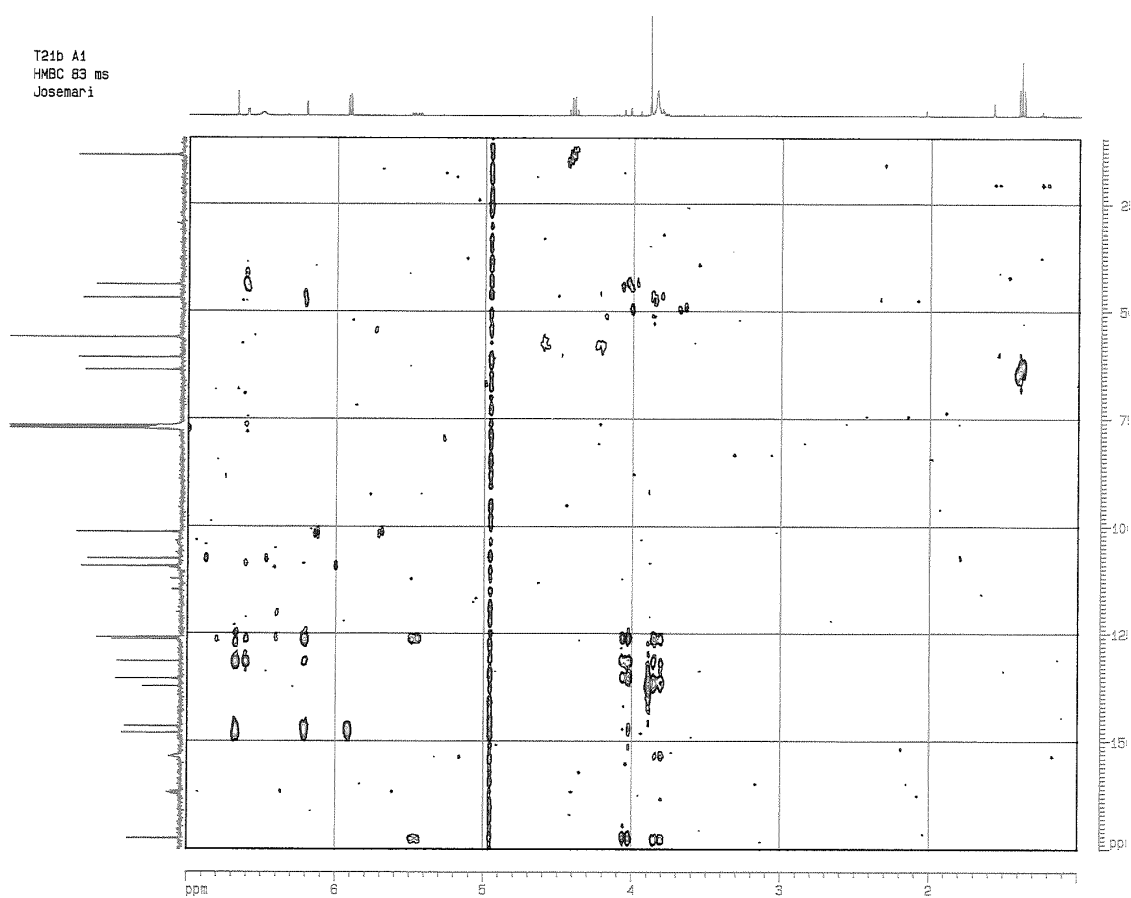

**Figure S15.** HMQC and HMBC for compound **10**

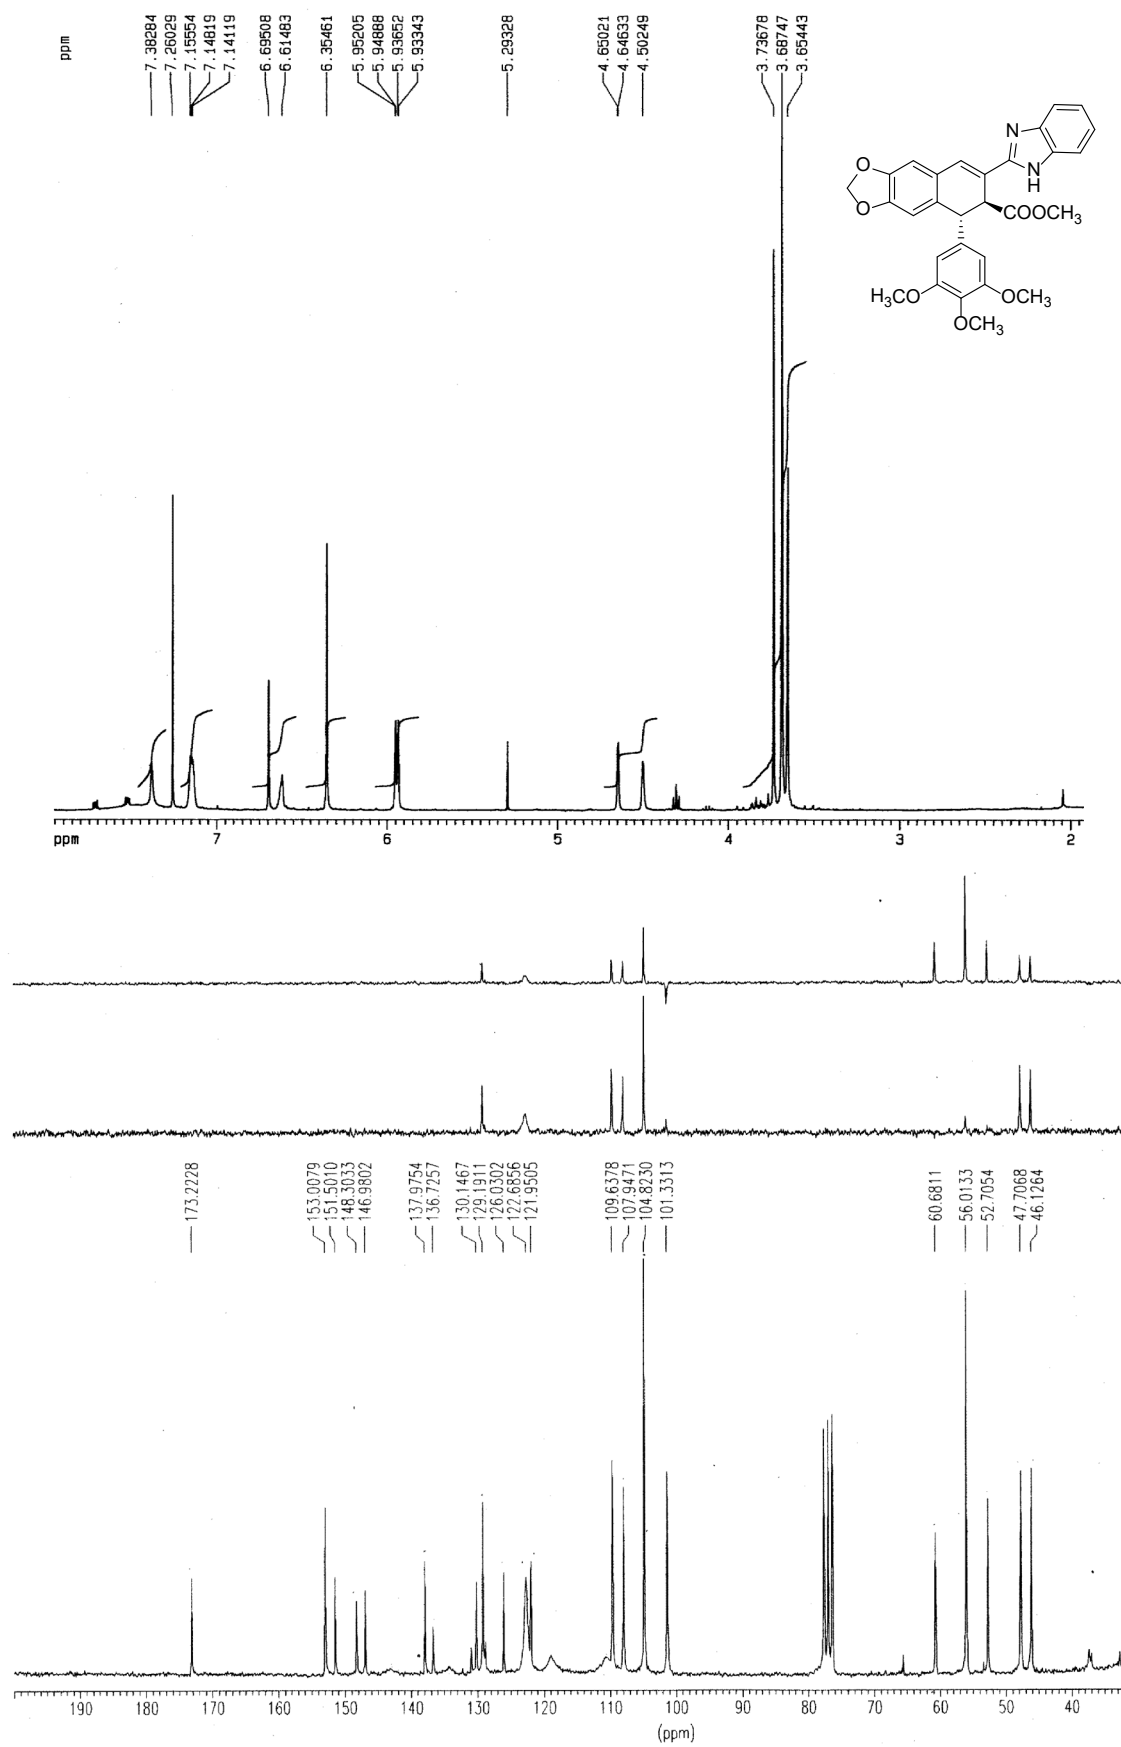

**Figure S16.** <sup>1</sup>H and <sup>13</sup>C for compound 11

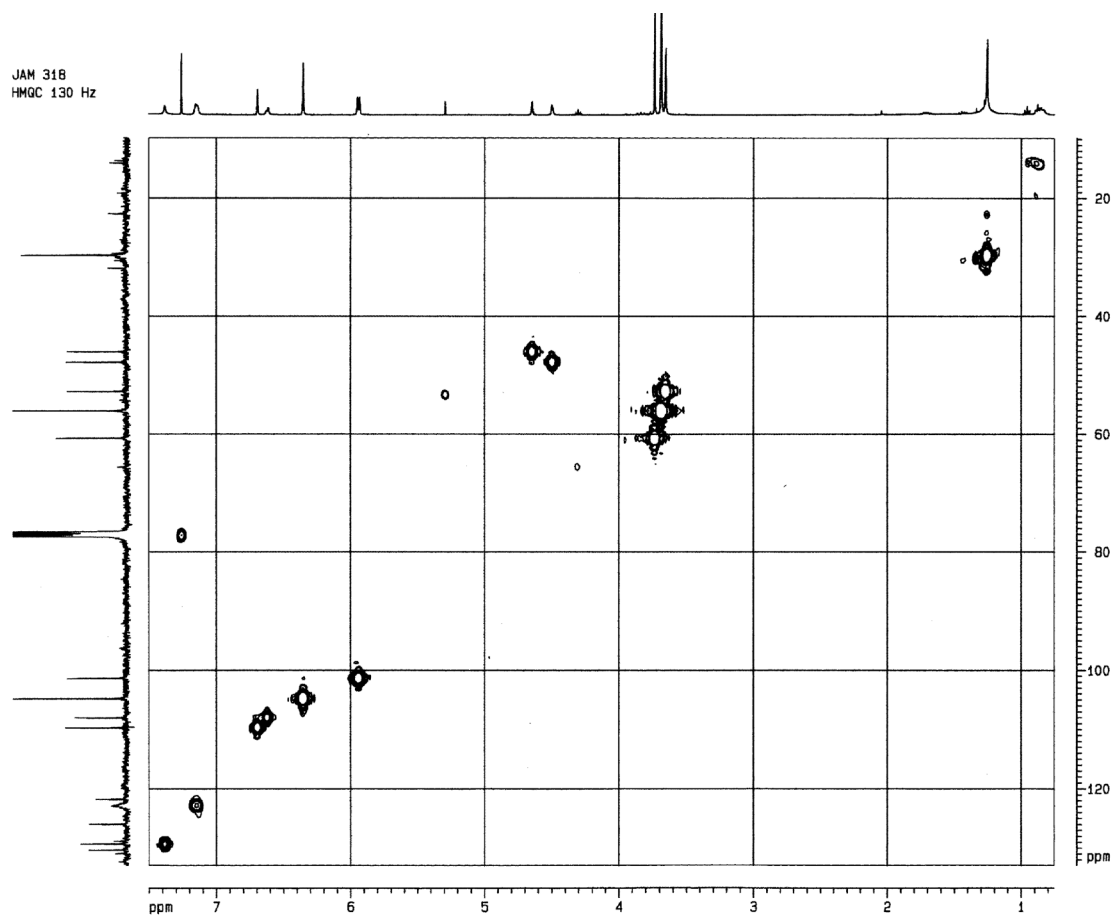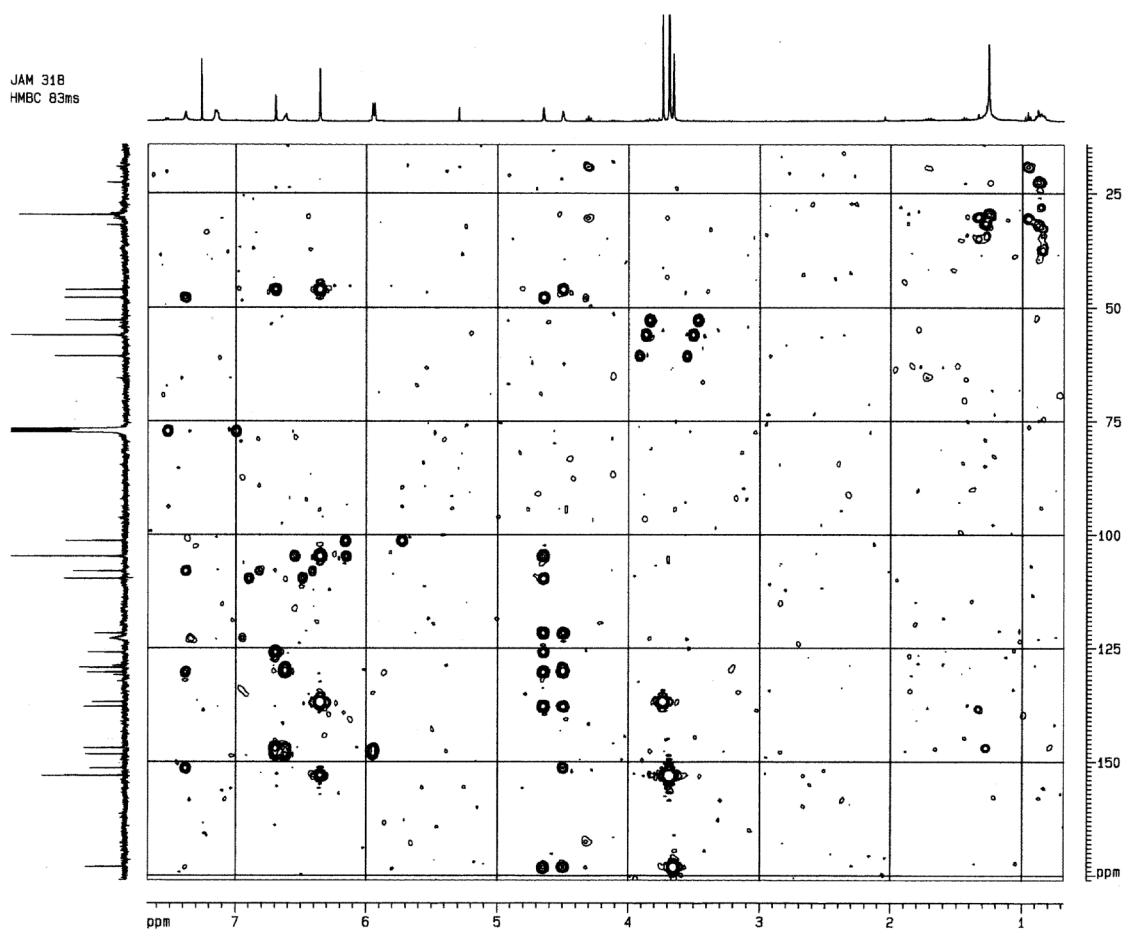

**Figure S17.** HMQC and HMBC for compound **11**

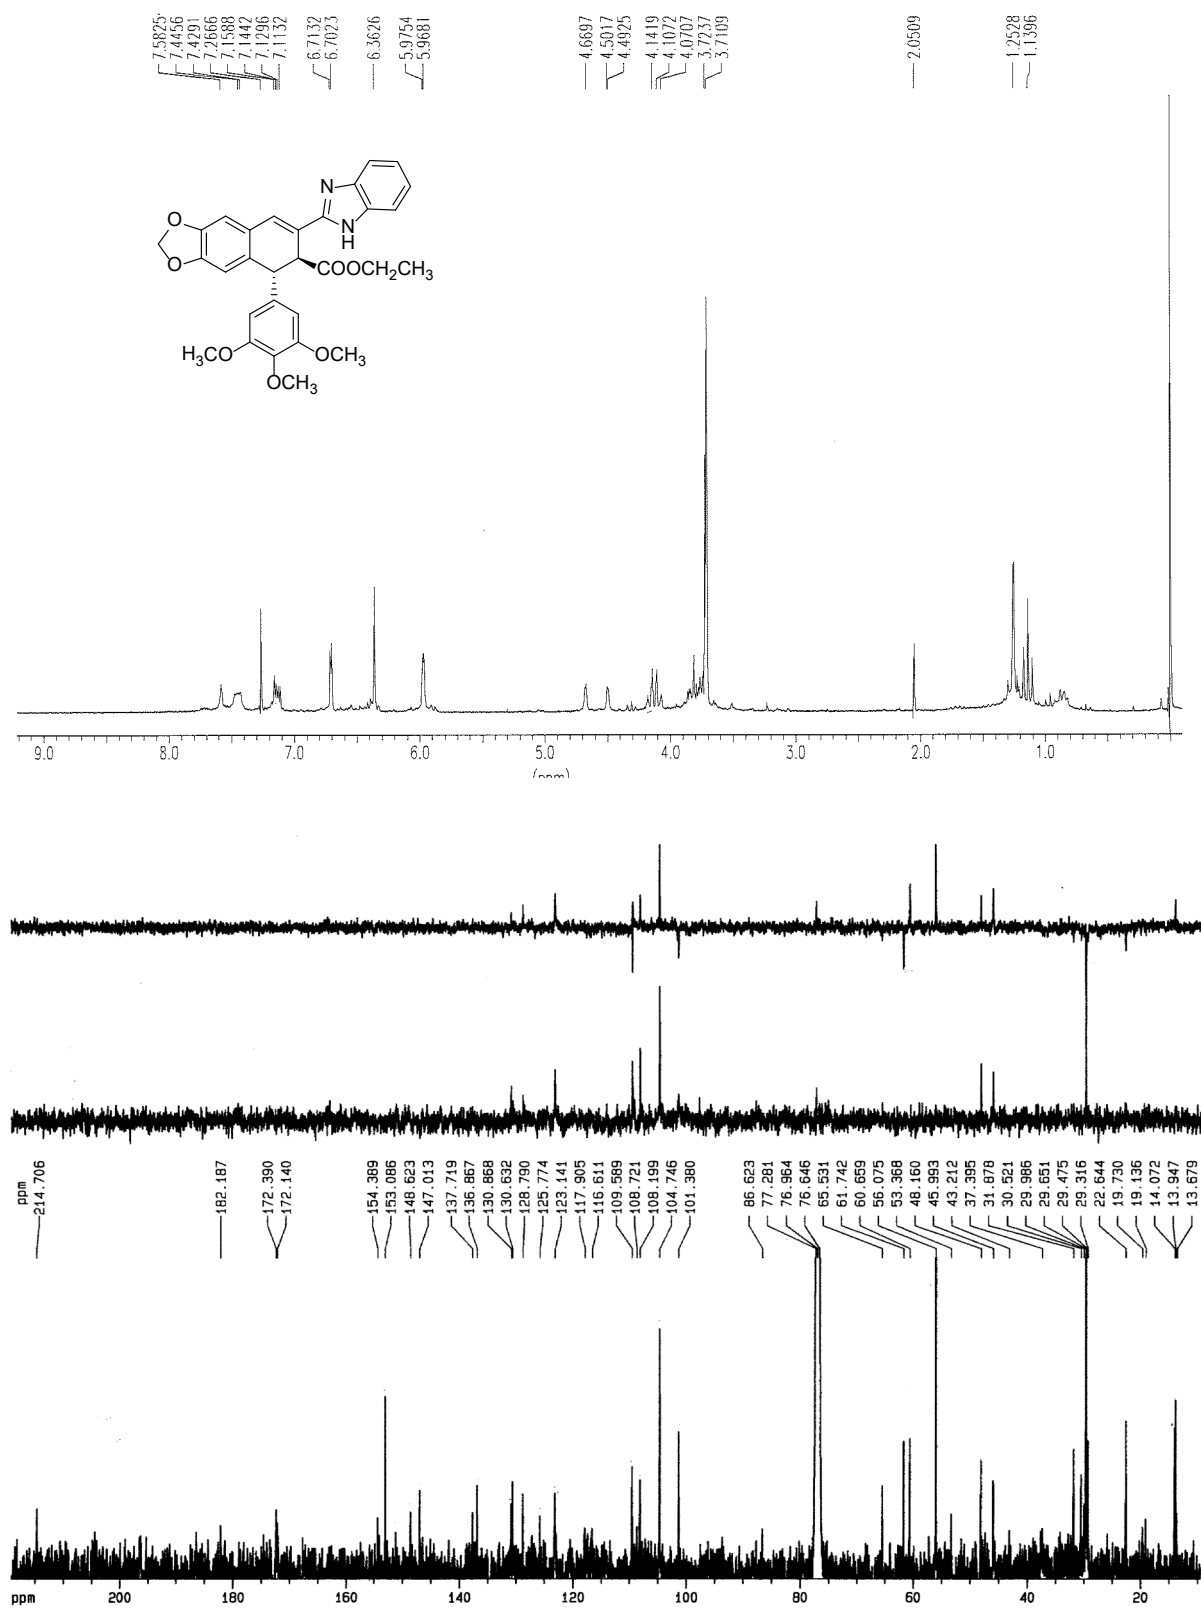

Figure S18. <sup>1</sup>H and <sup>13</sup>C for compound 12



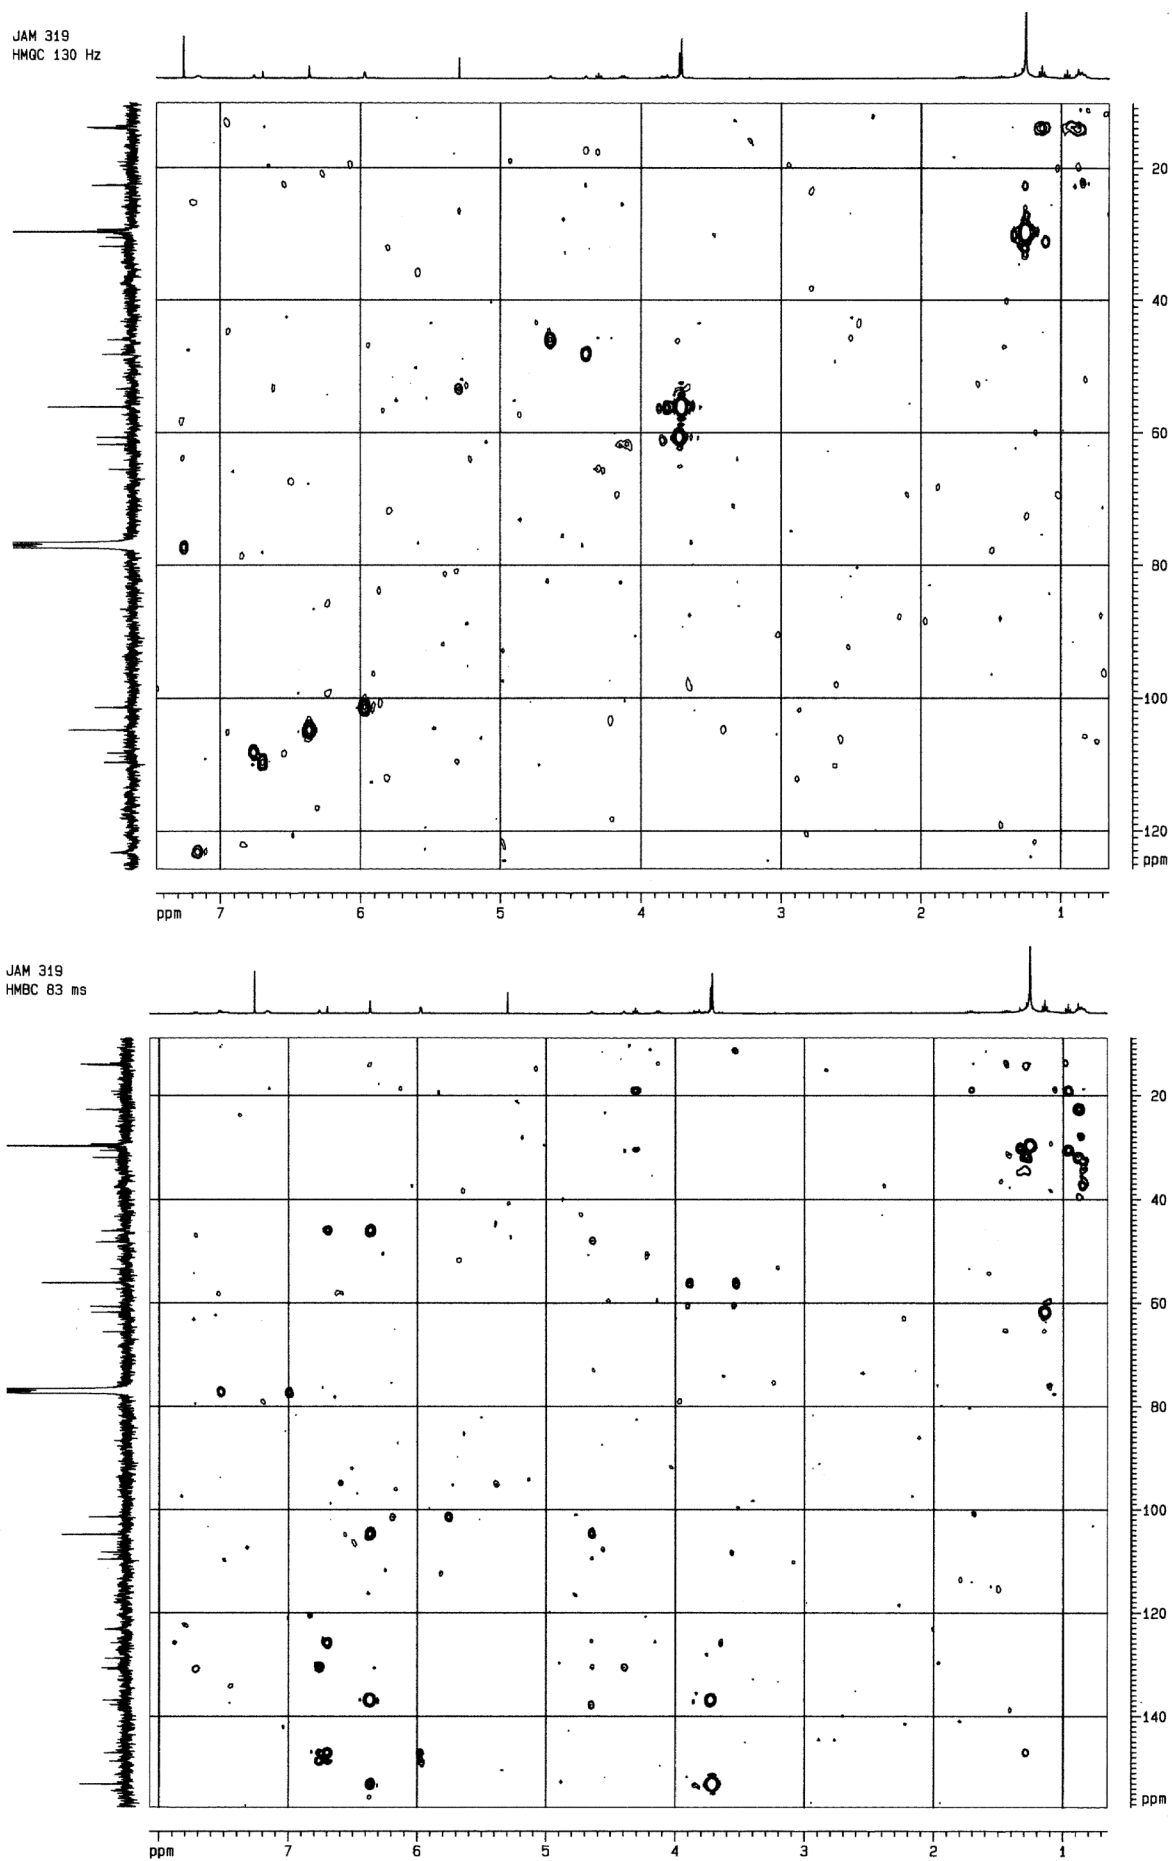

**Figure S19.** HMQC and HMBC for compound **12**

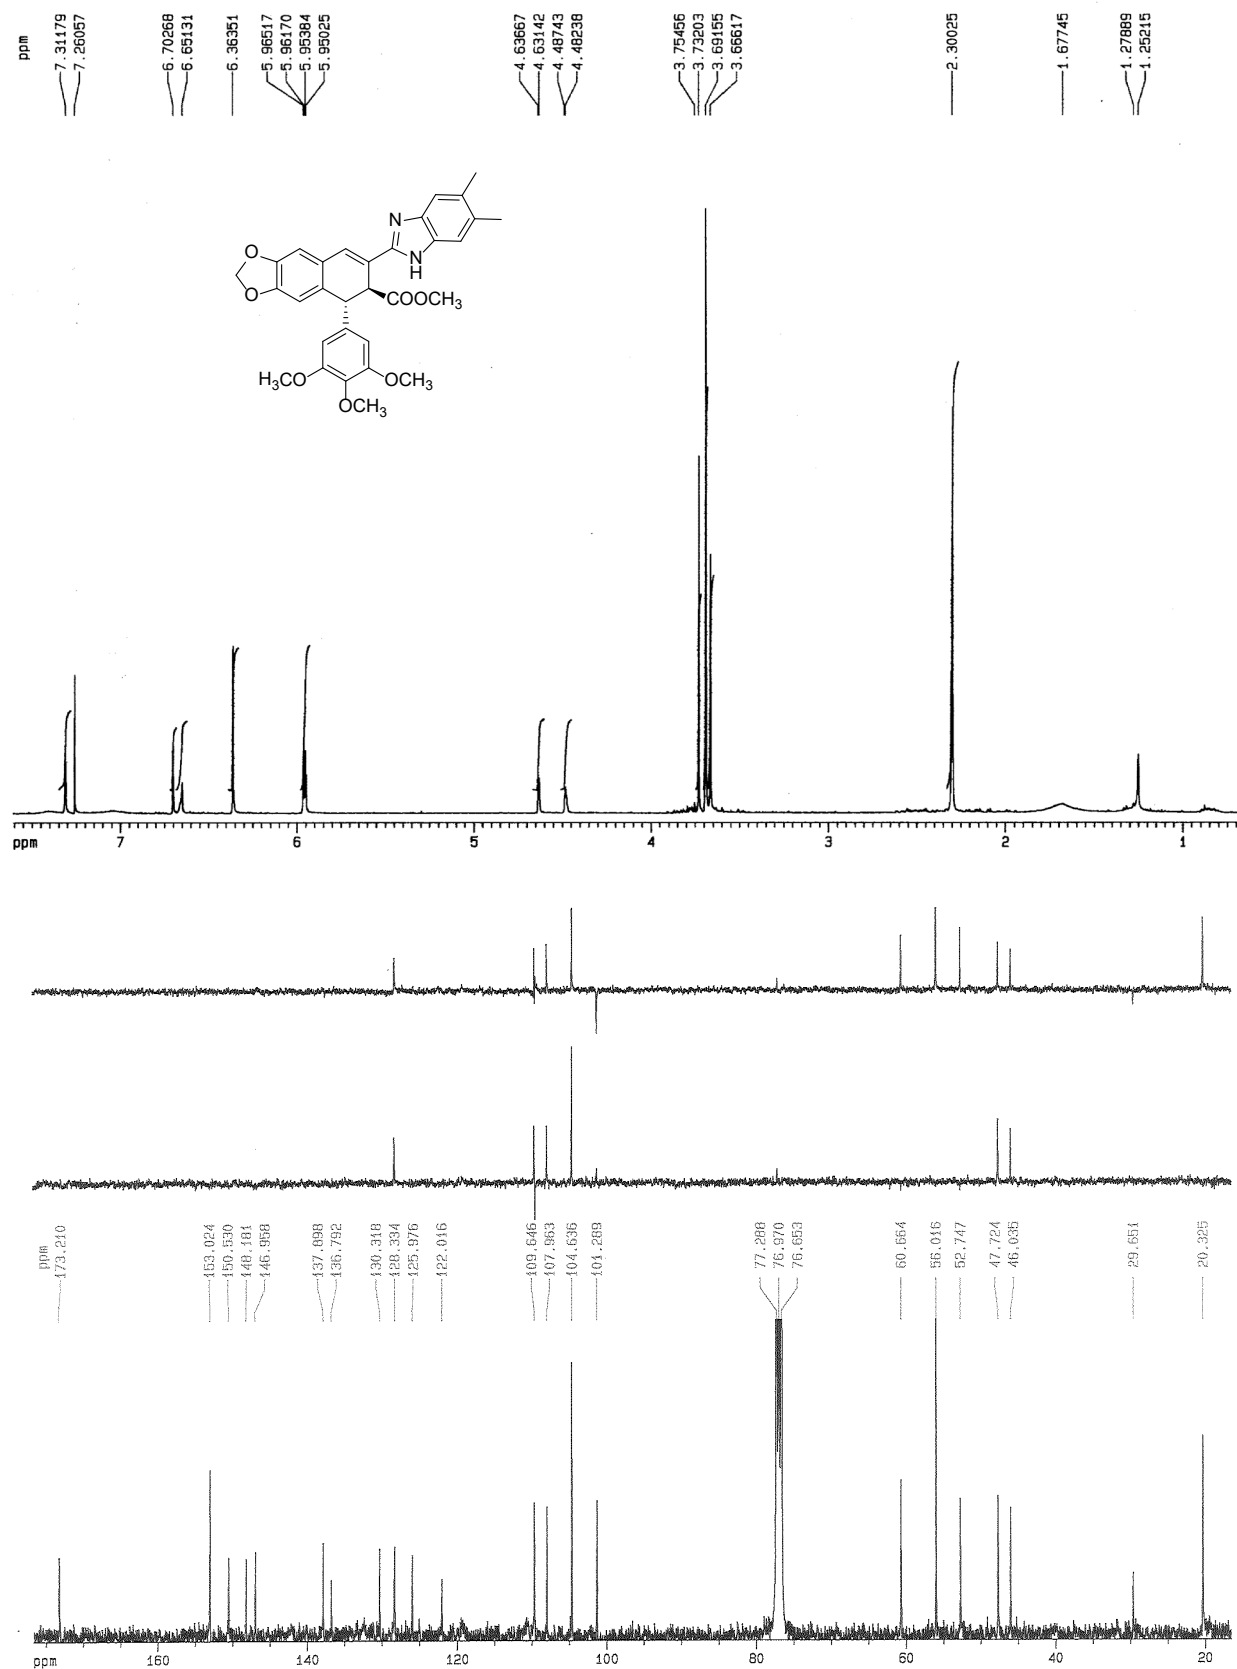

Figure S20. <sup>1</sup>H and <sup>13</sup>C for compound 13

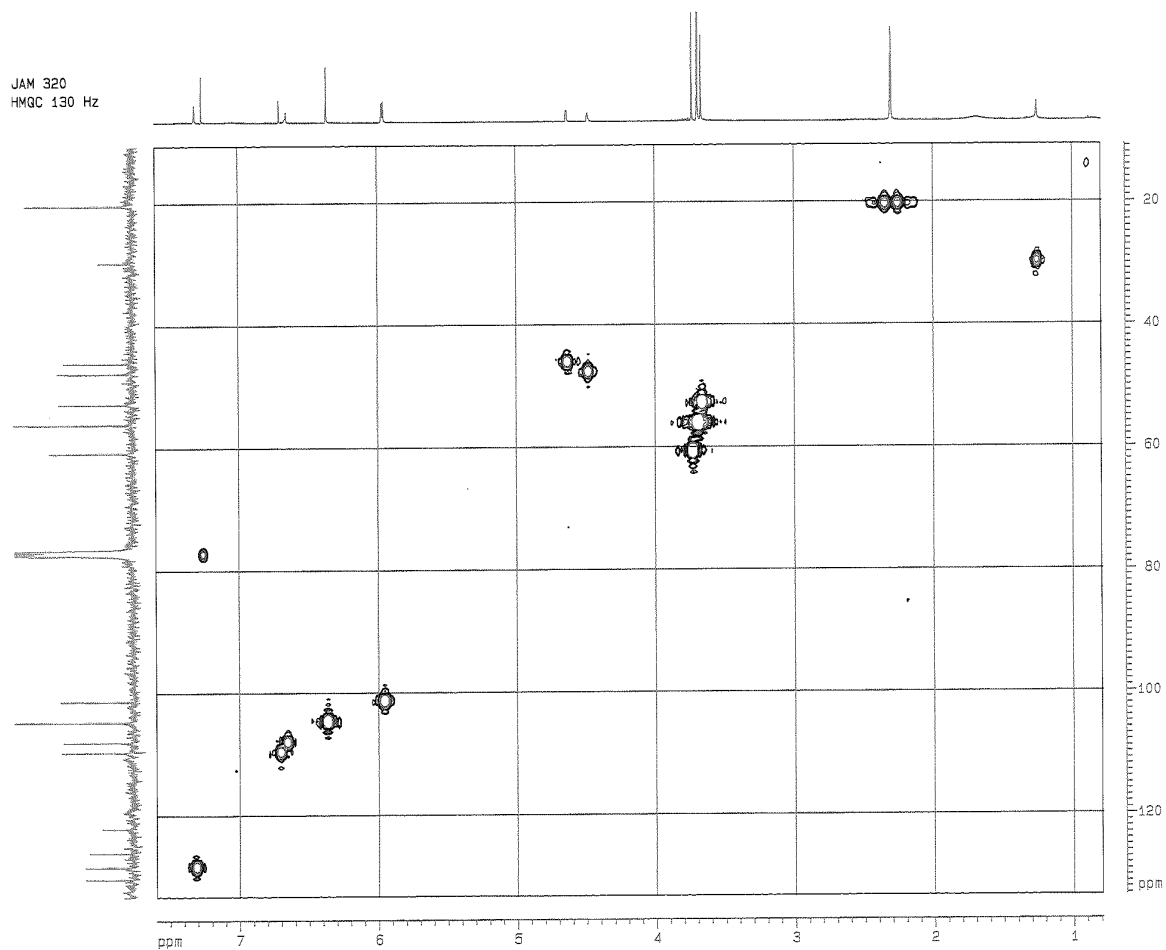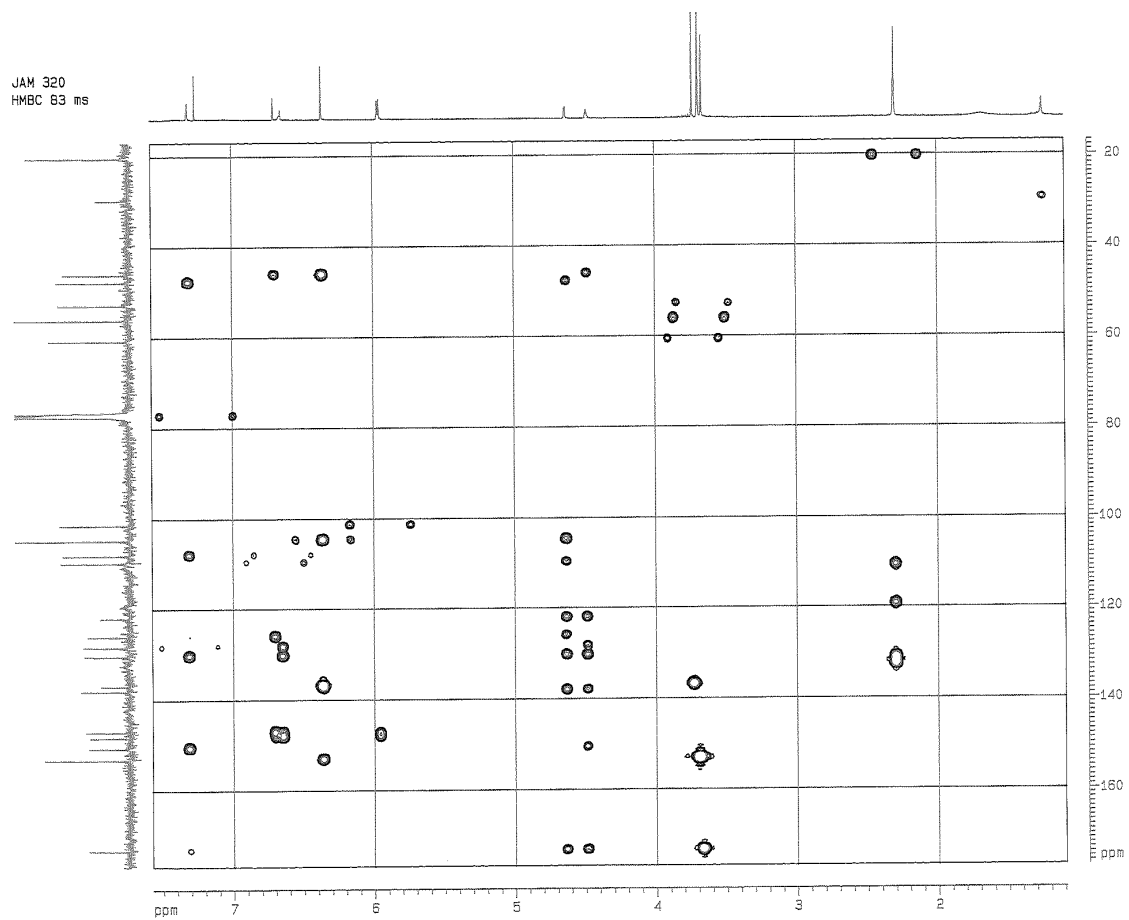

**Figure S21.** HMQC and HMBC for compound **13**

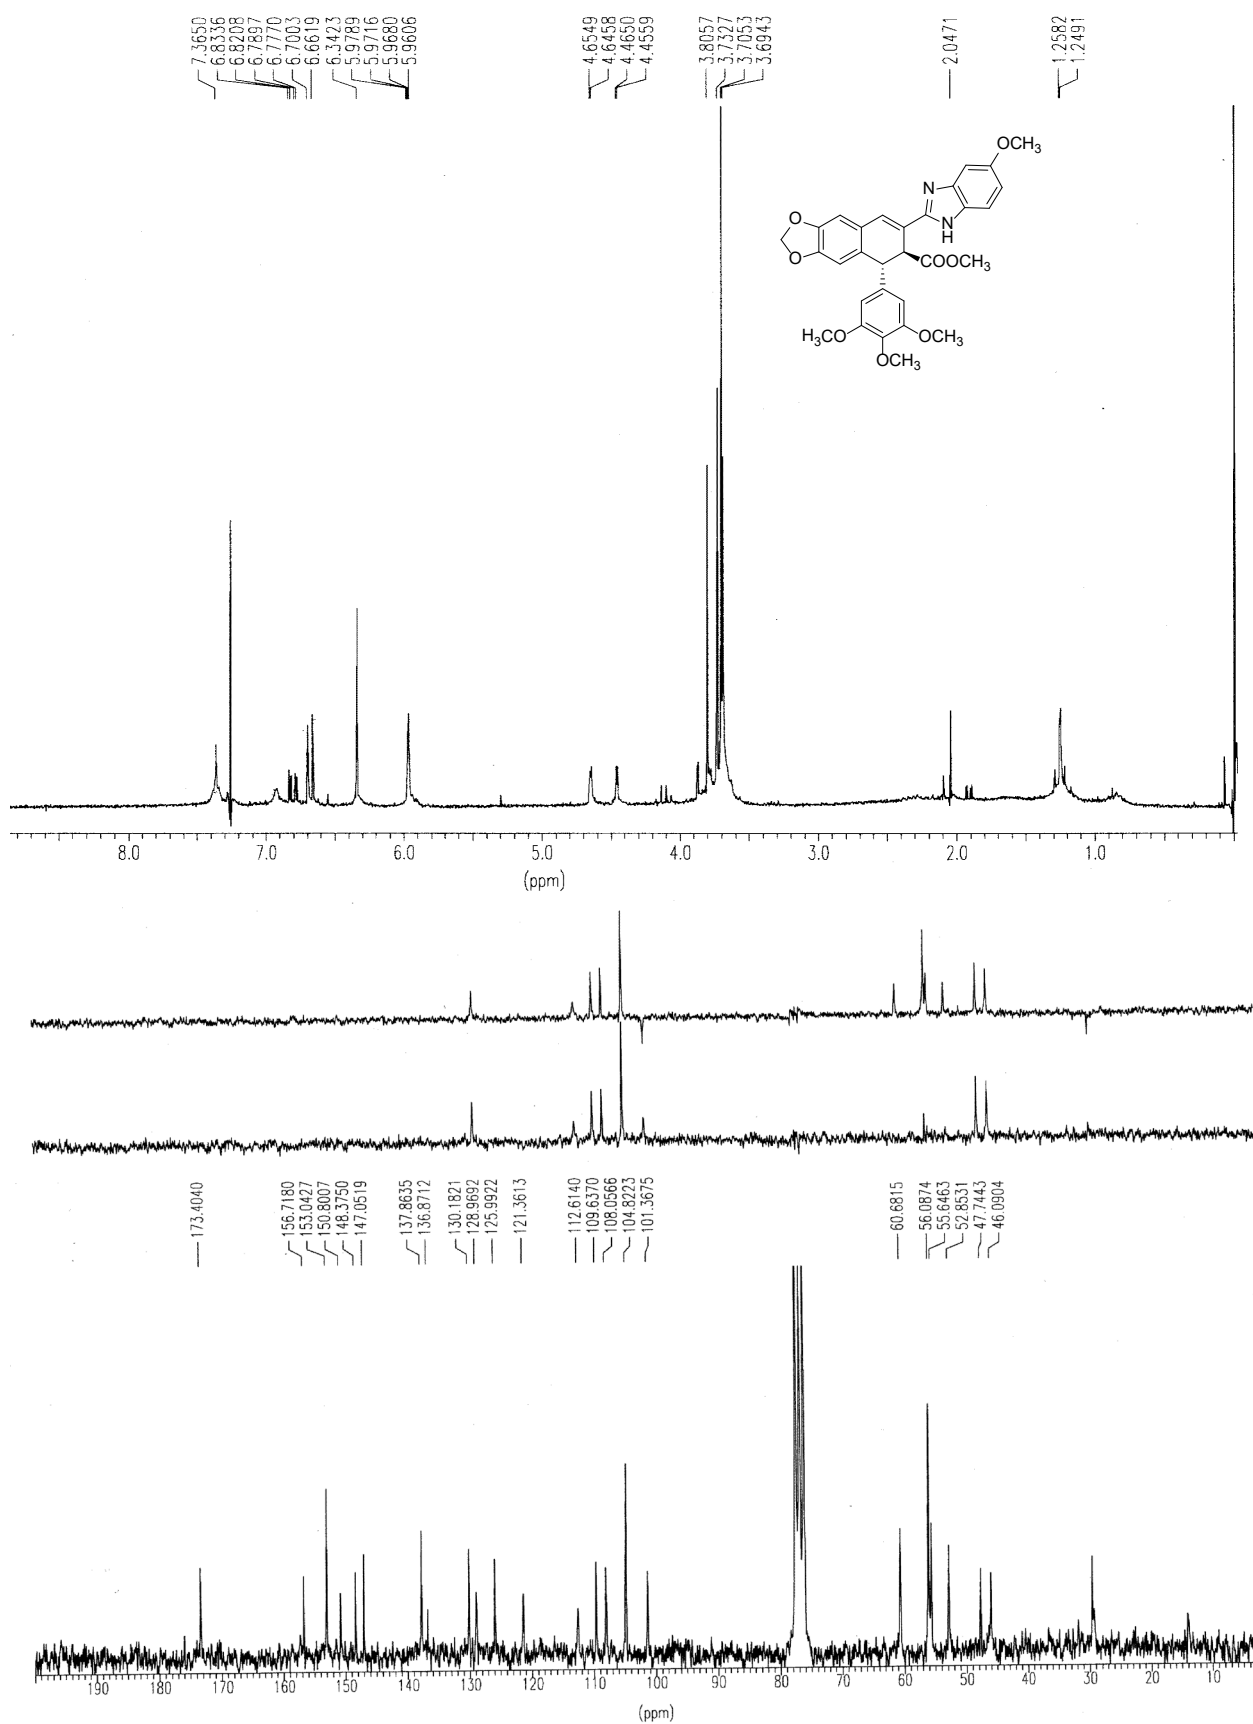

**Figure S22.** <sup>1</sup>H and <sup>13</sup>C for compound **14**

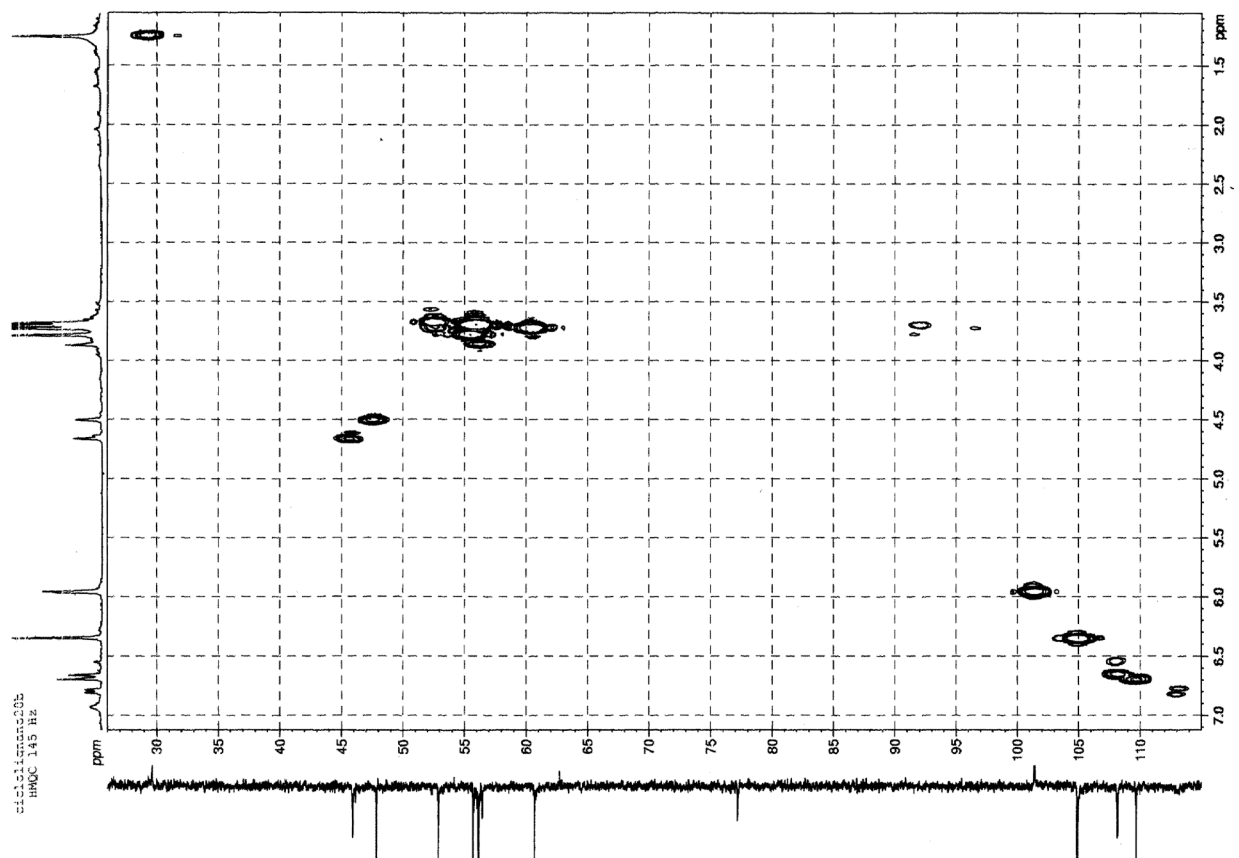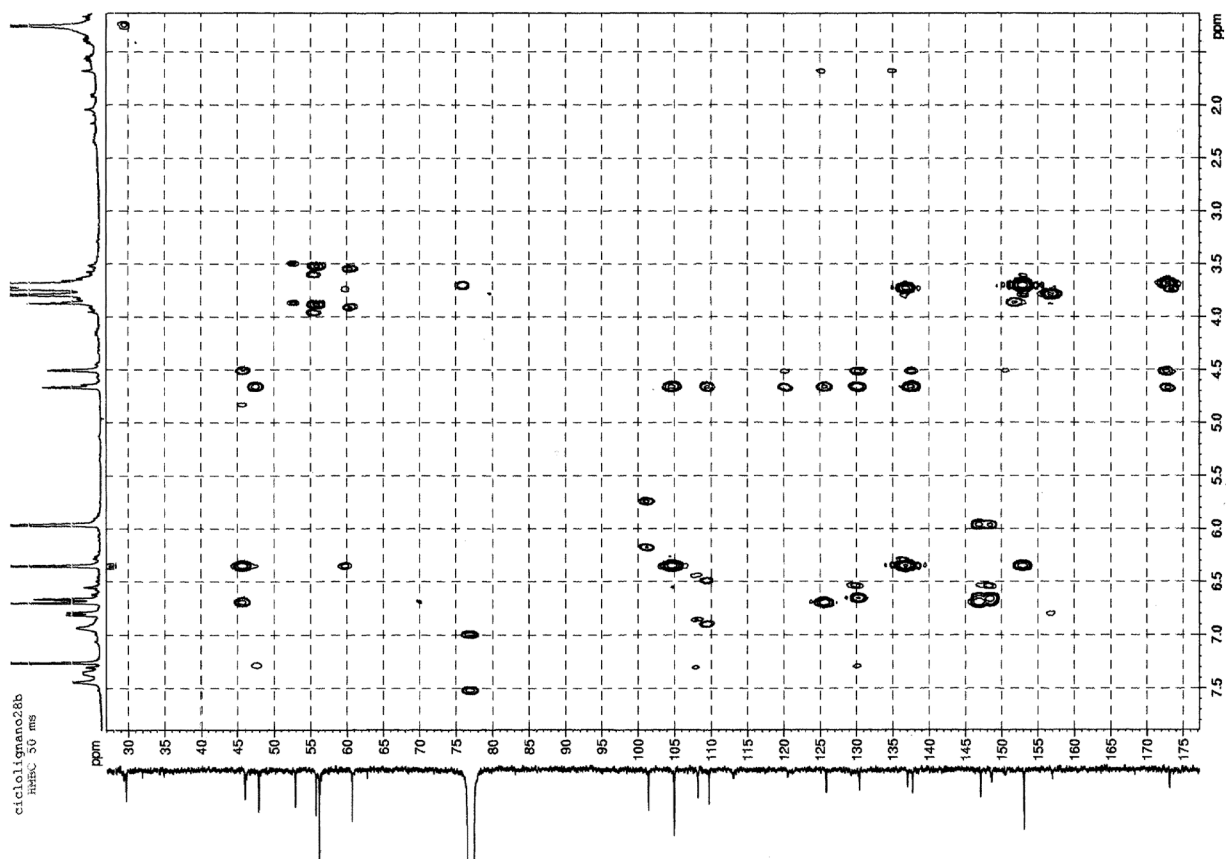

Figure S23. HMQC and HMBC for compound 14

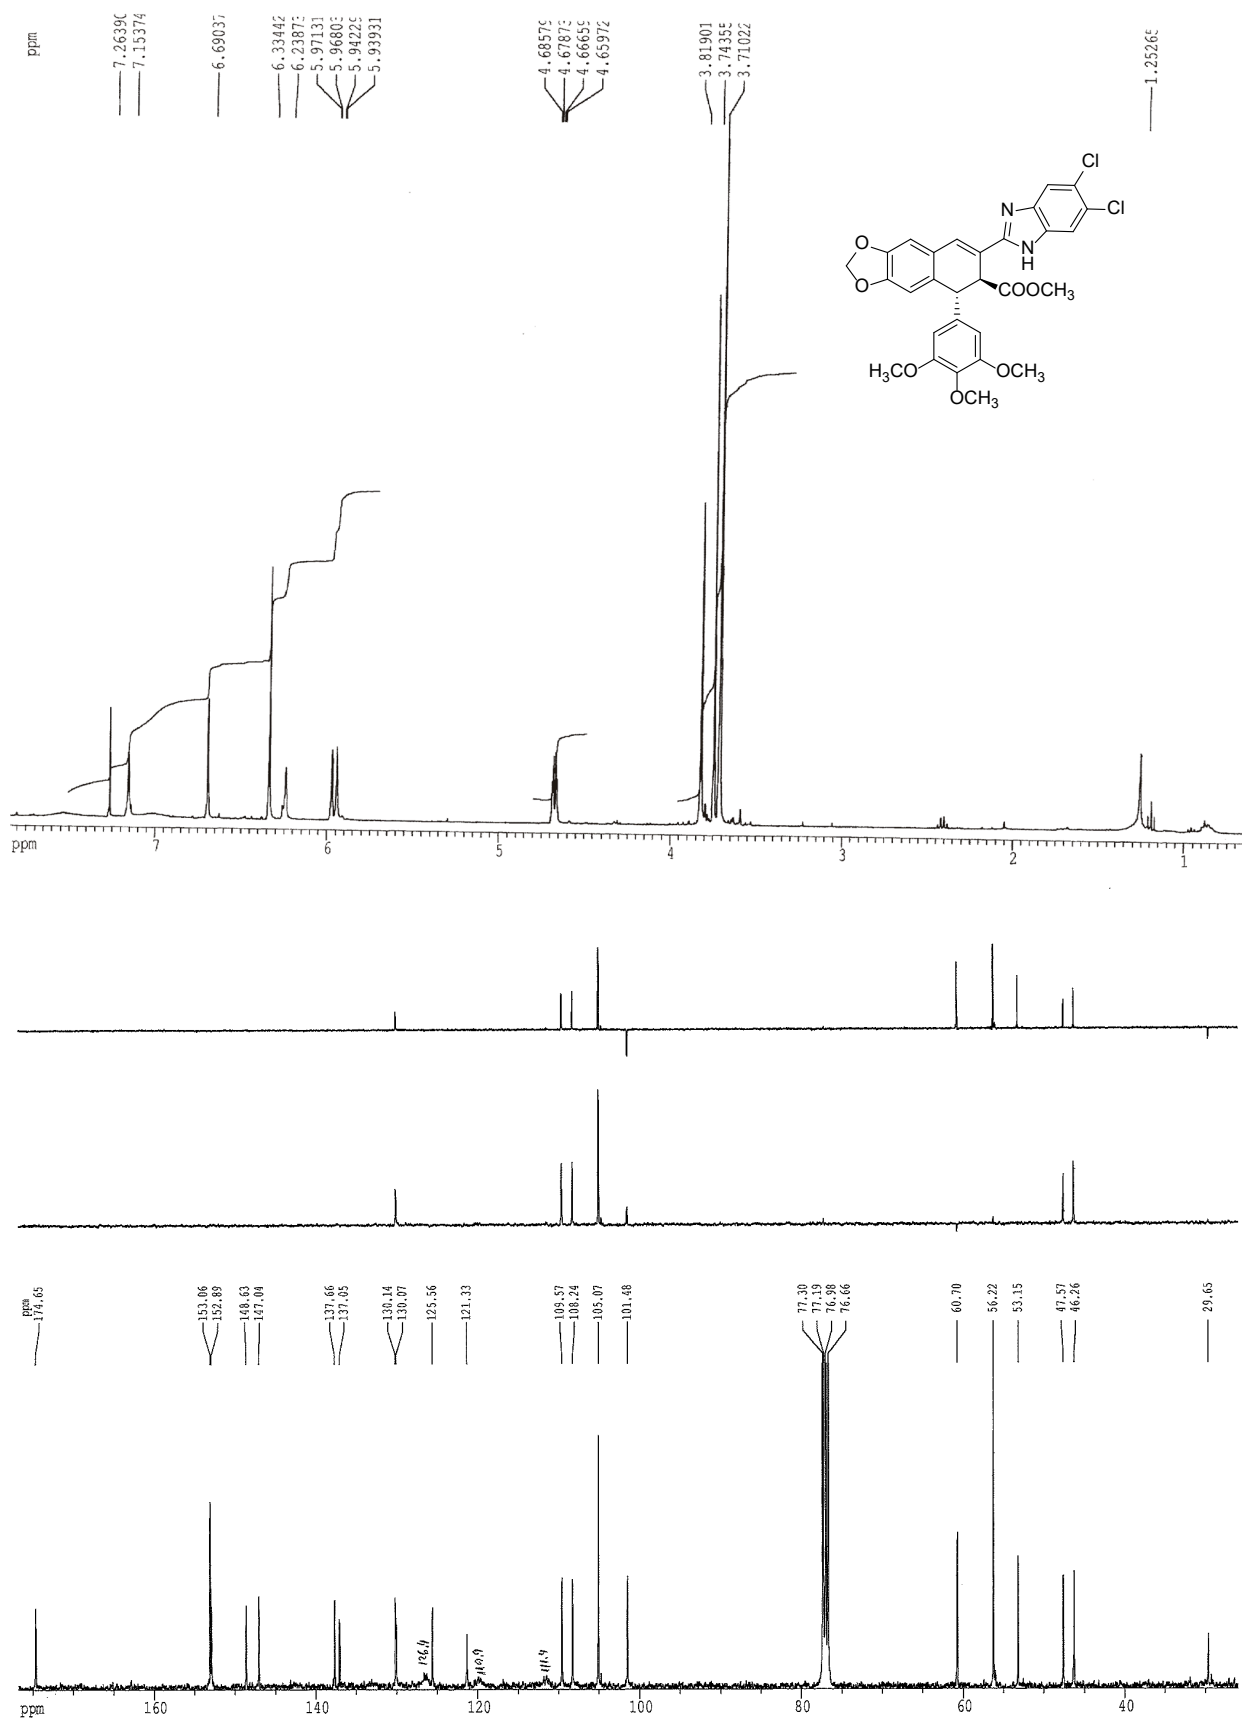

**Figure S24.** <sup>1</sup>H and <sup>13</sup>C for compound **15**

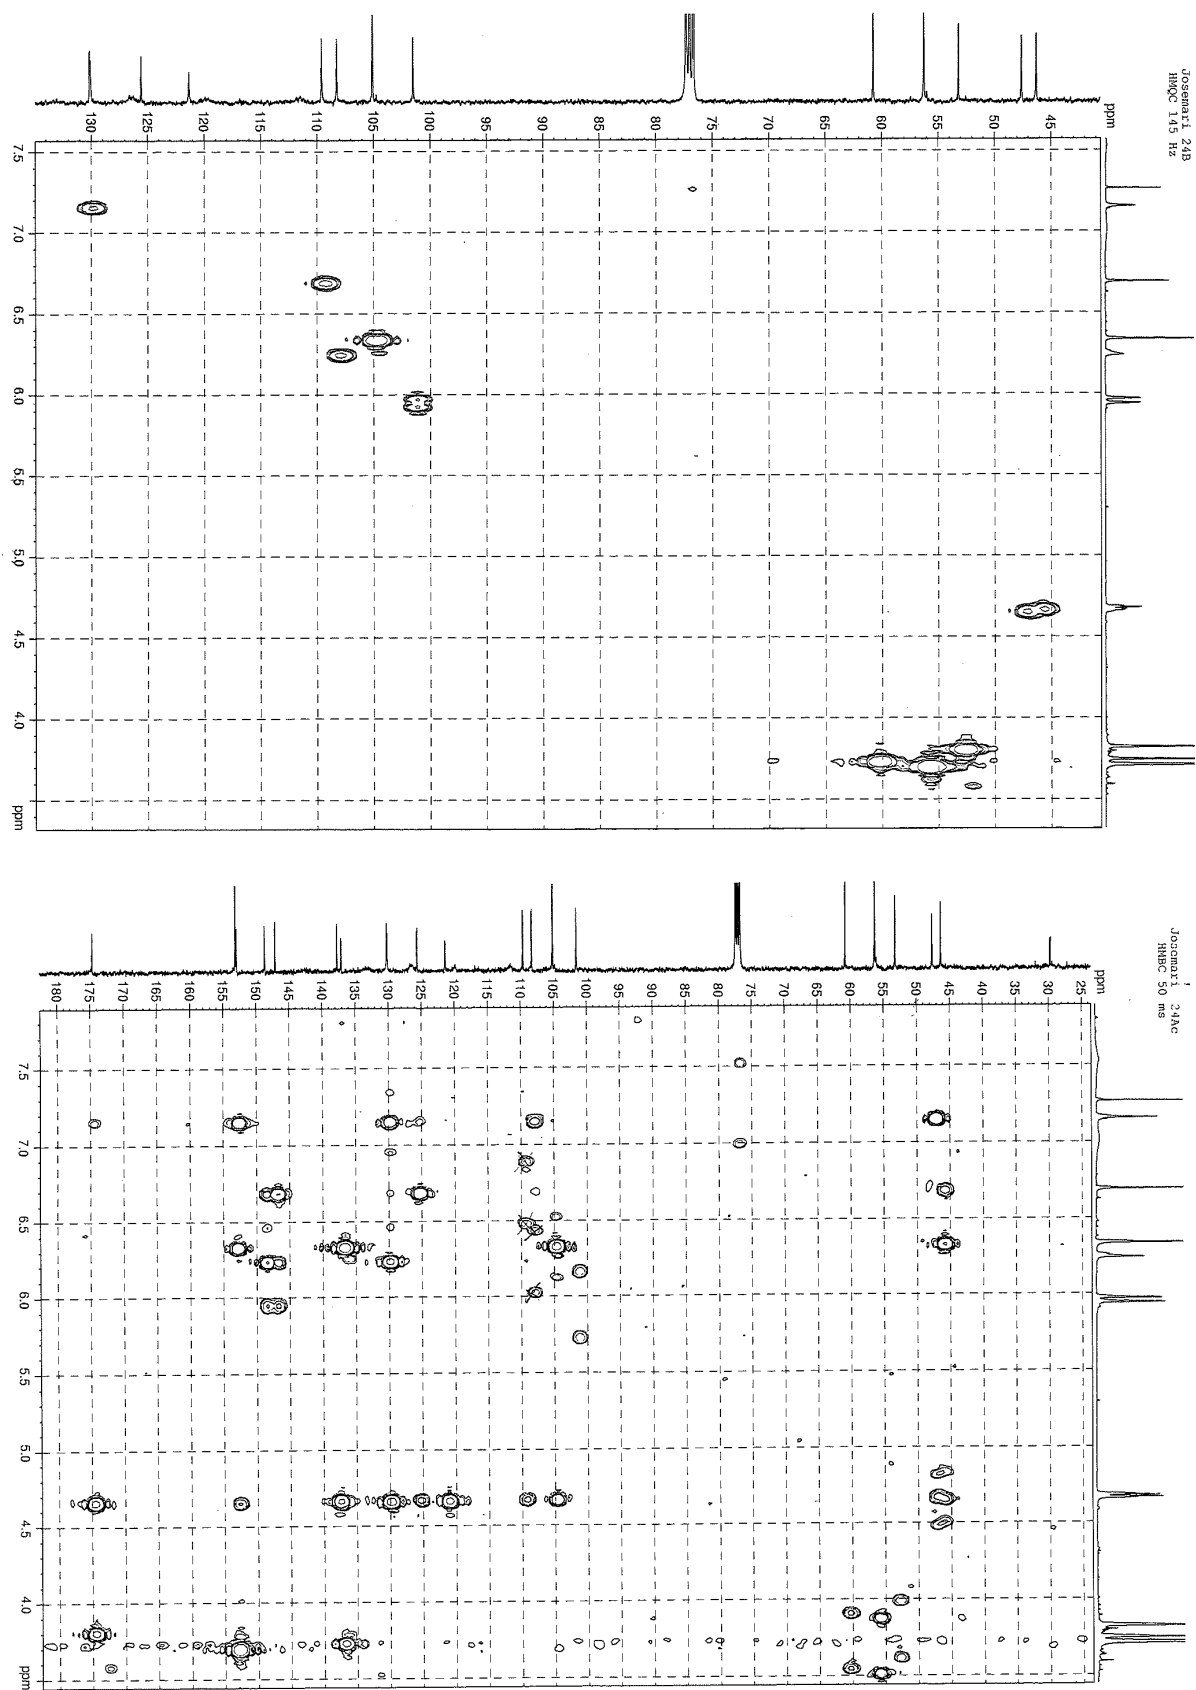

**Figure S25.** HMQC and HMBC for compound 15

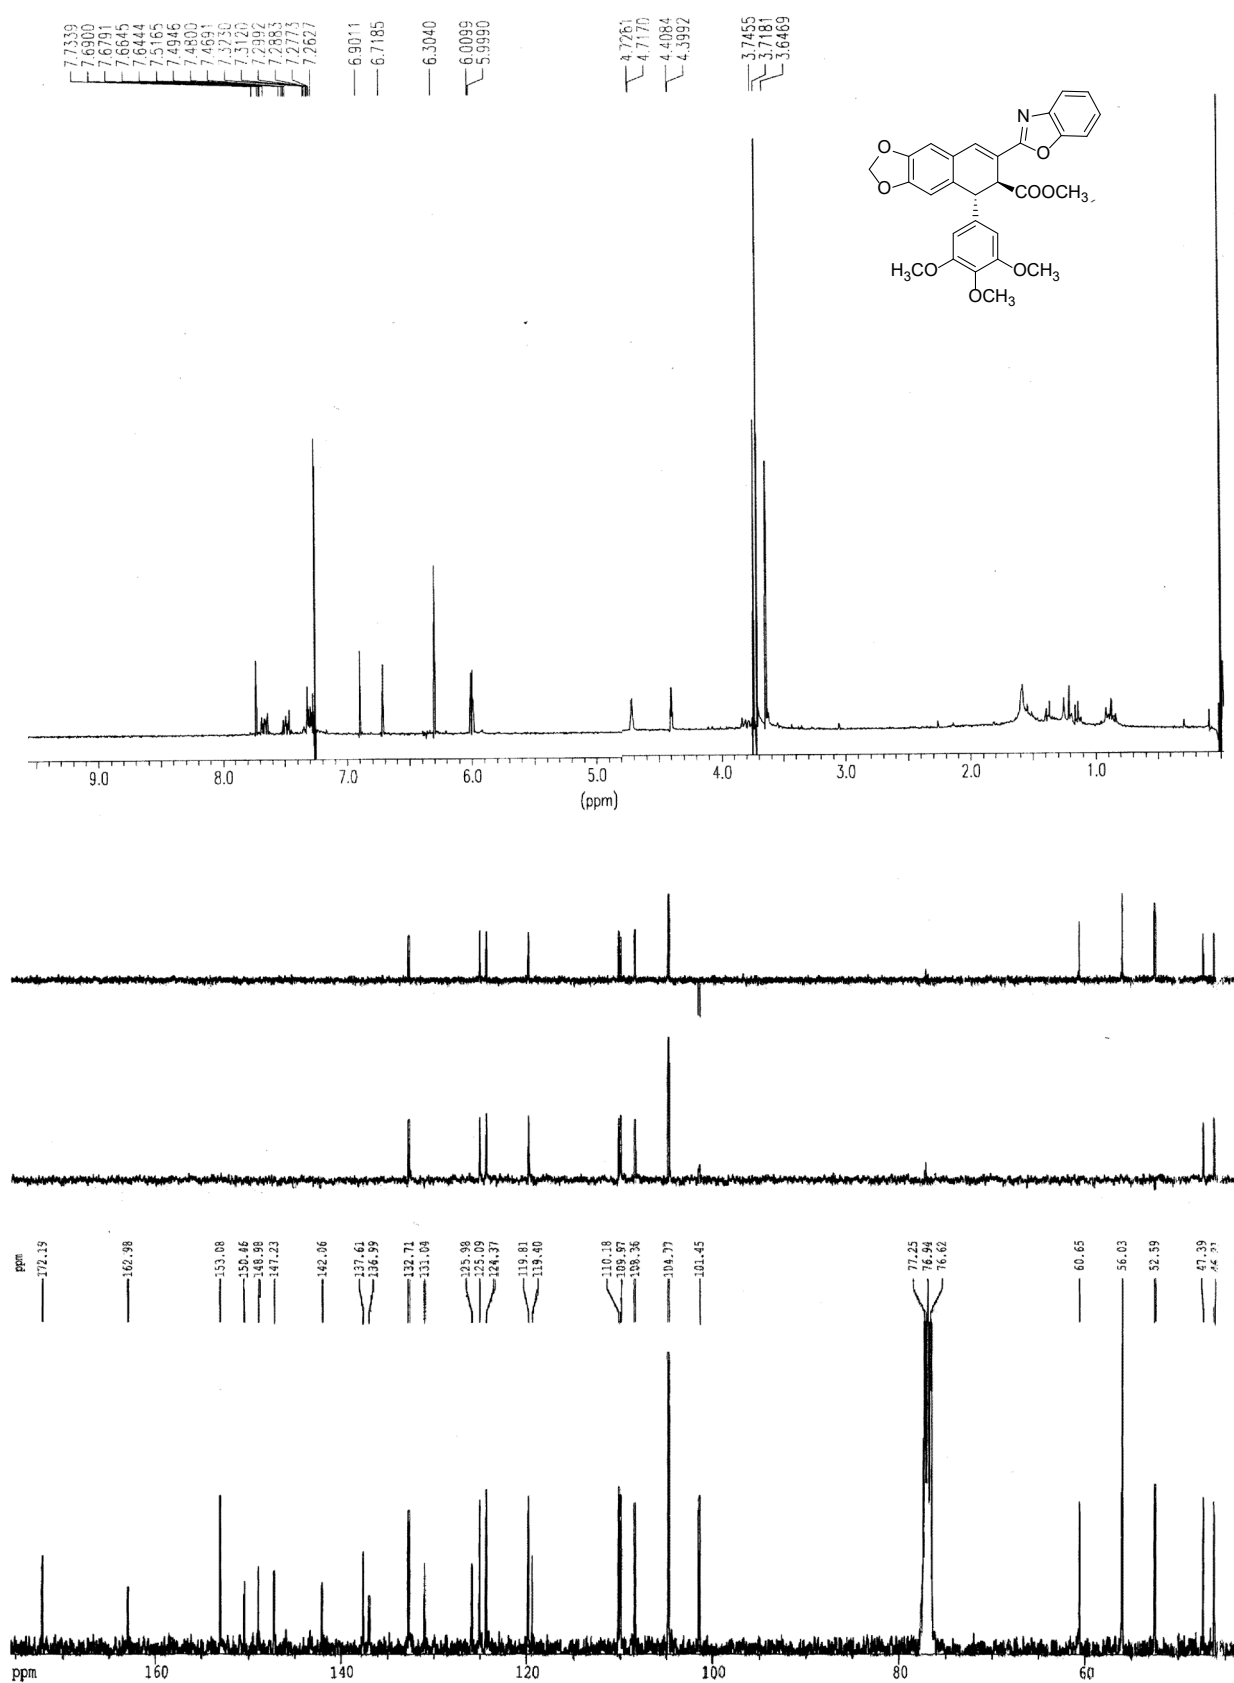

Figure S26. <sup>1</sup>H and <sup>13</sup>C for compound 16



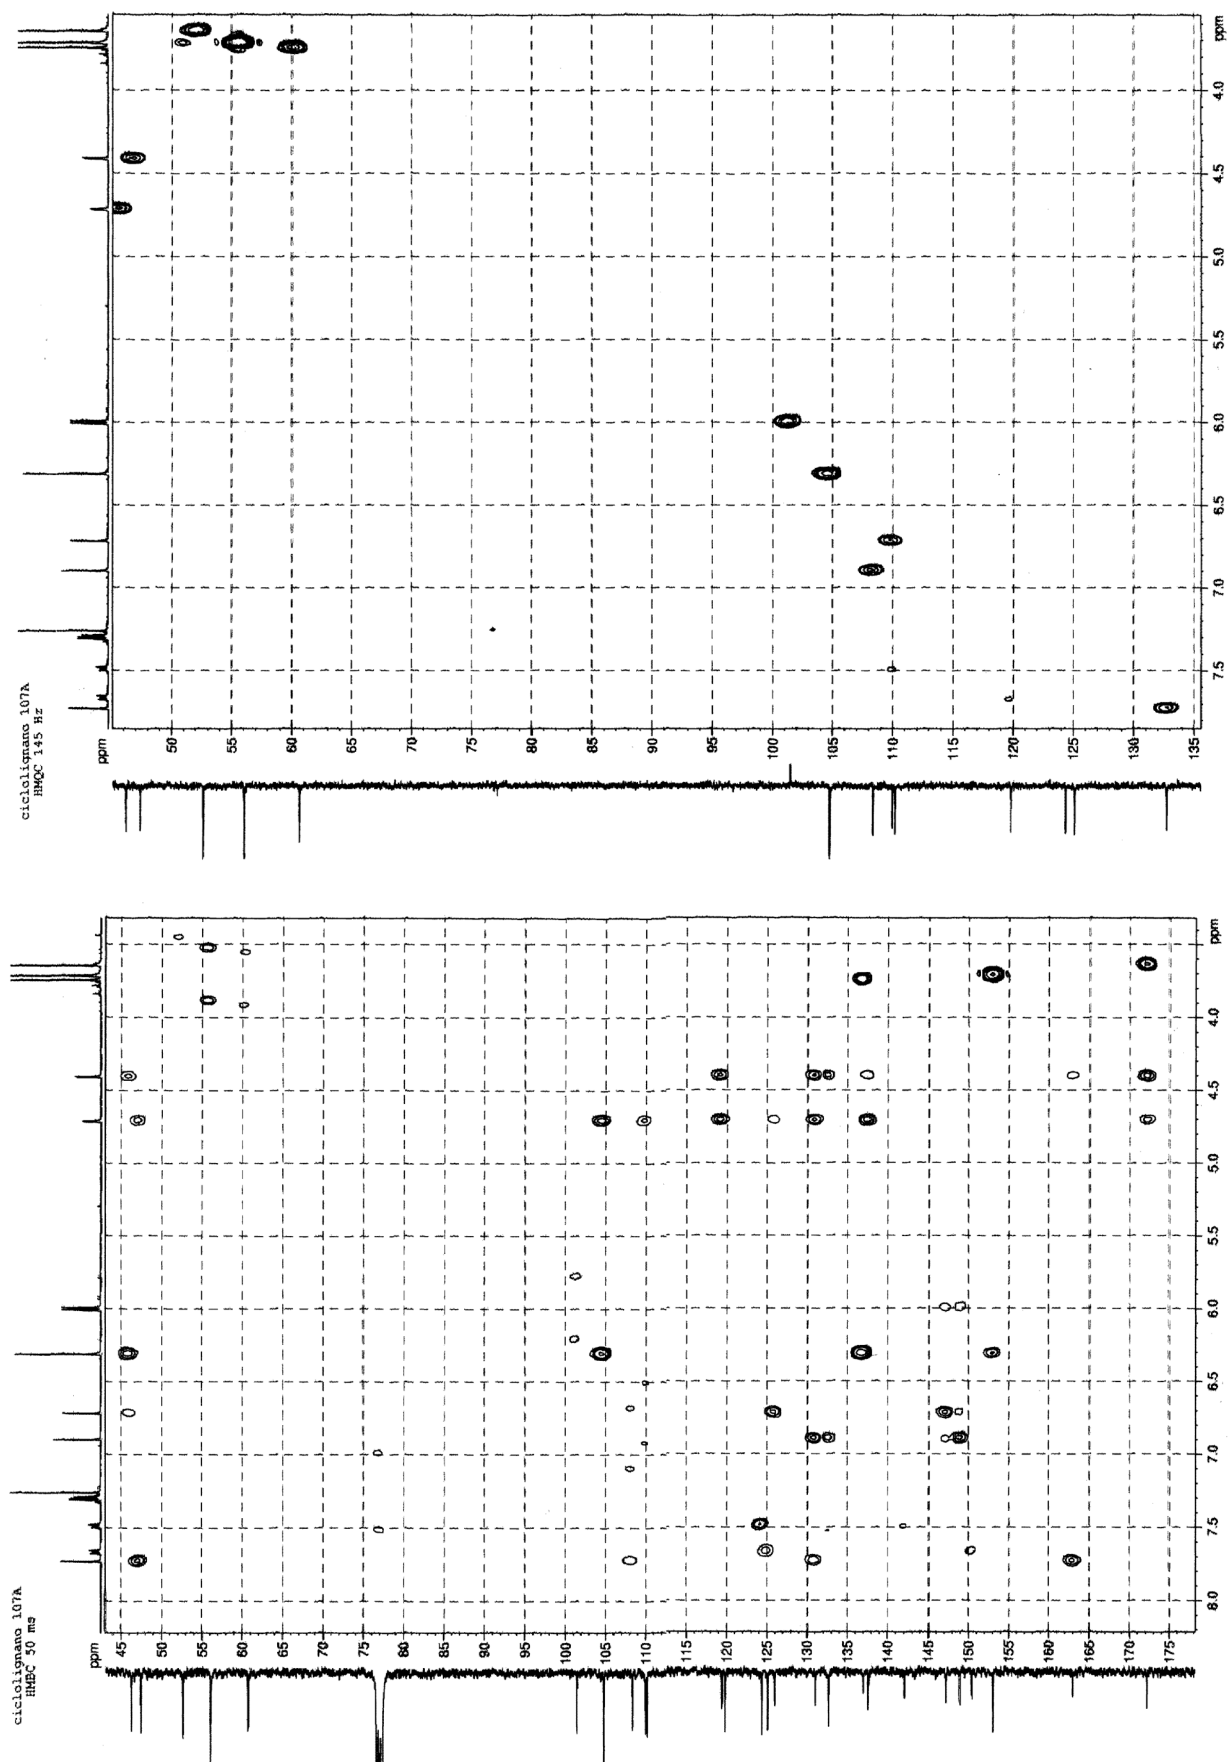

Figure S27. HMQC and HMBC for compound 16

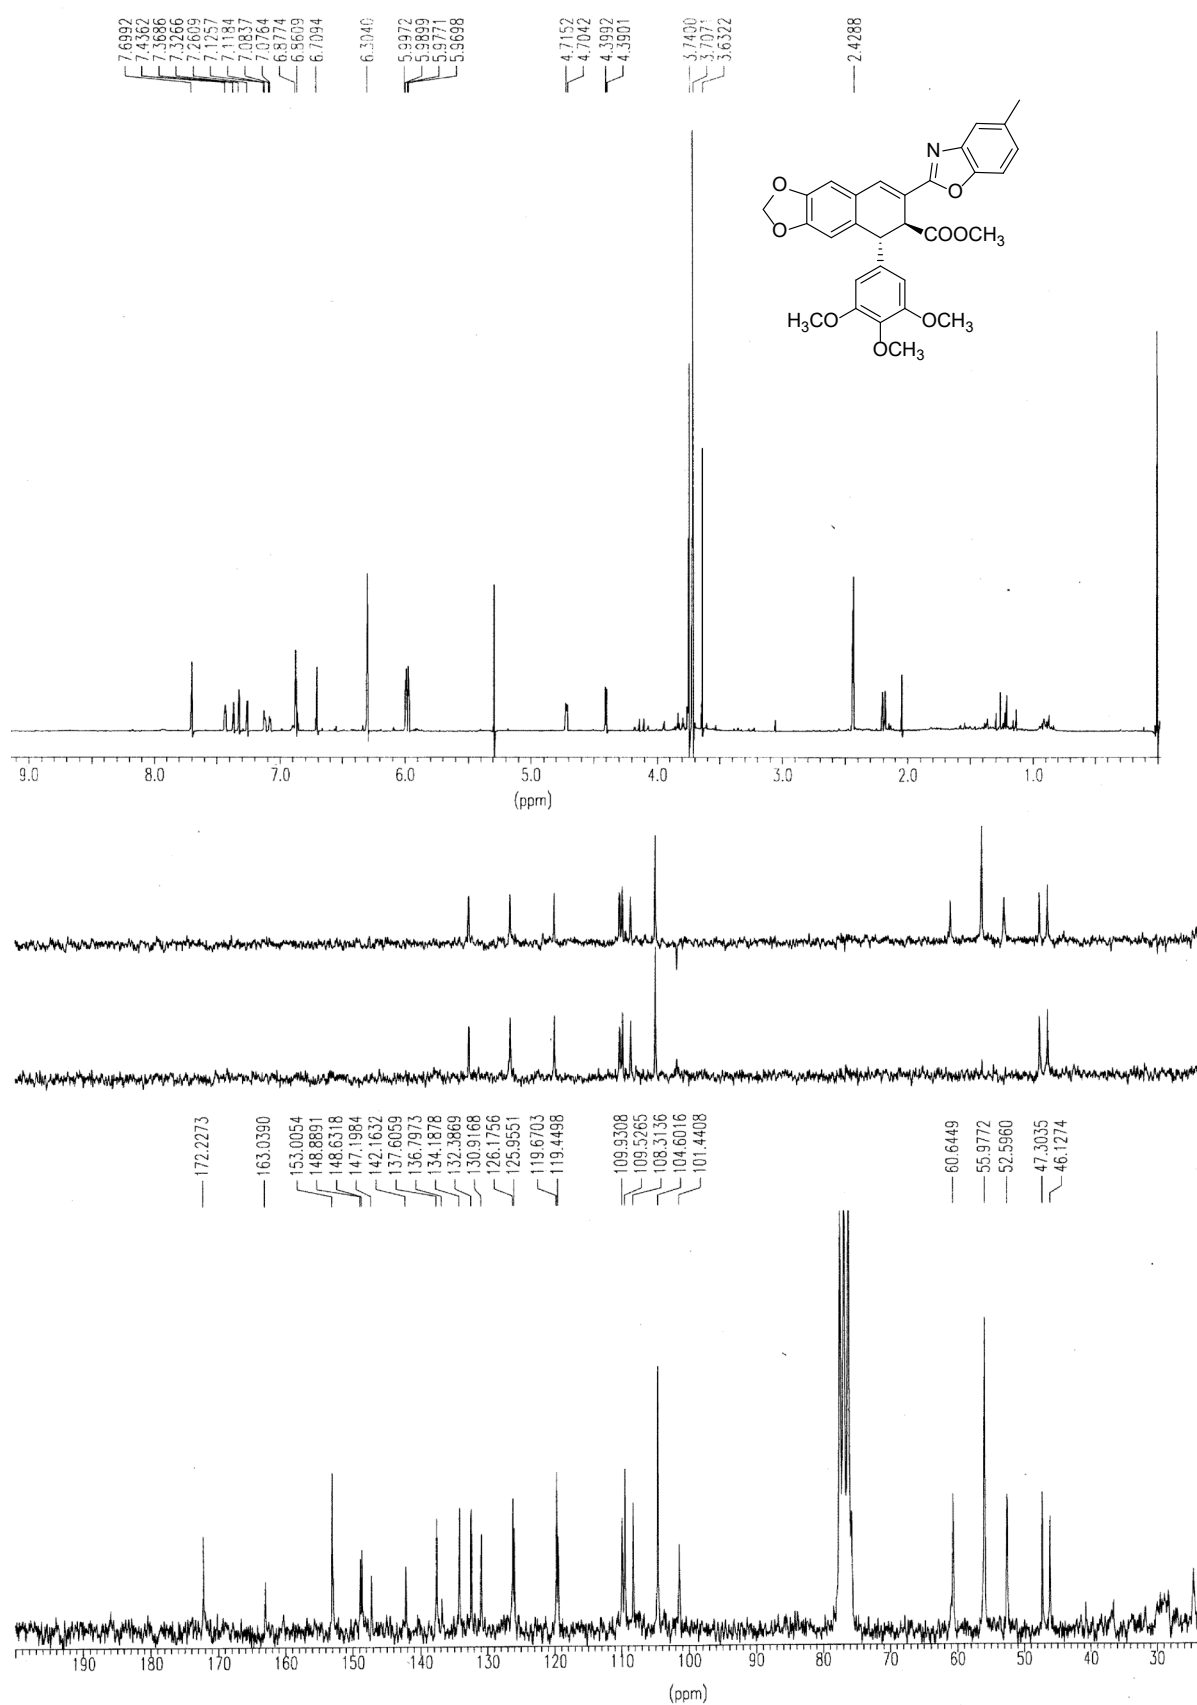

**Figure S28.** <sup>1</sup>H and <sup>13</sup>C for compound **17**

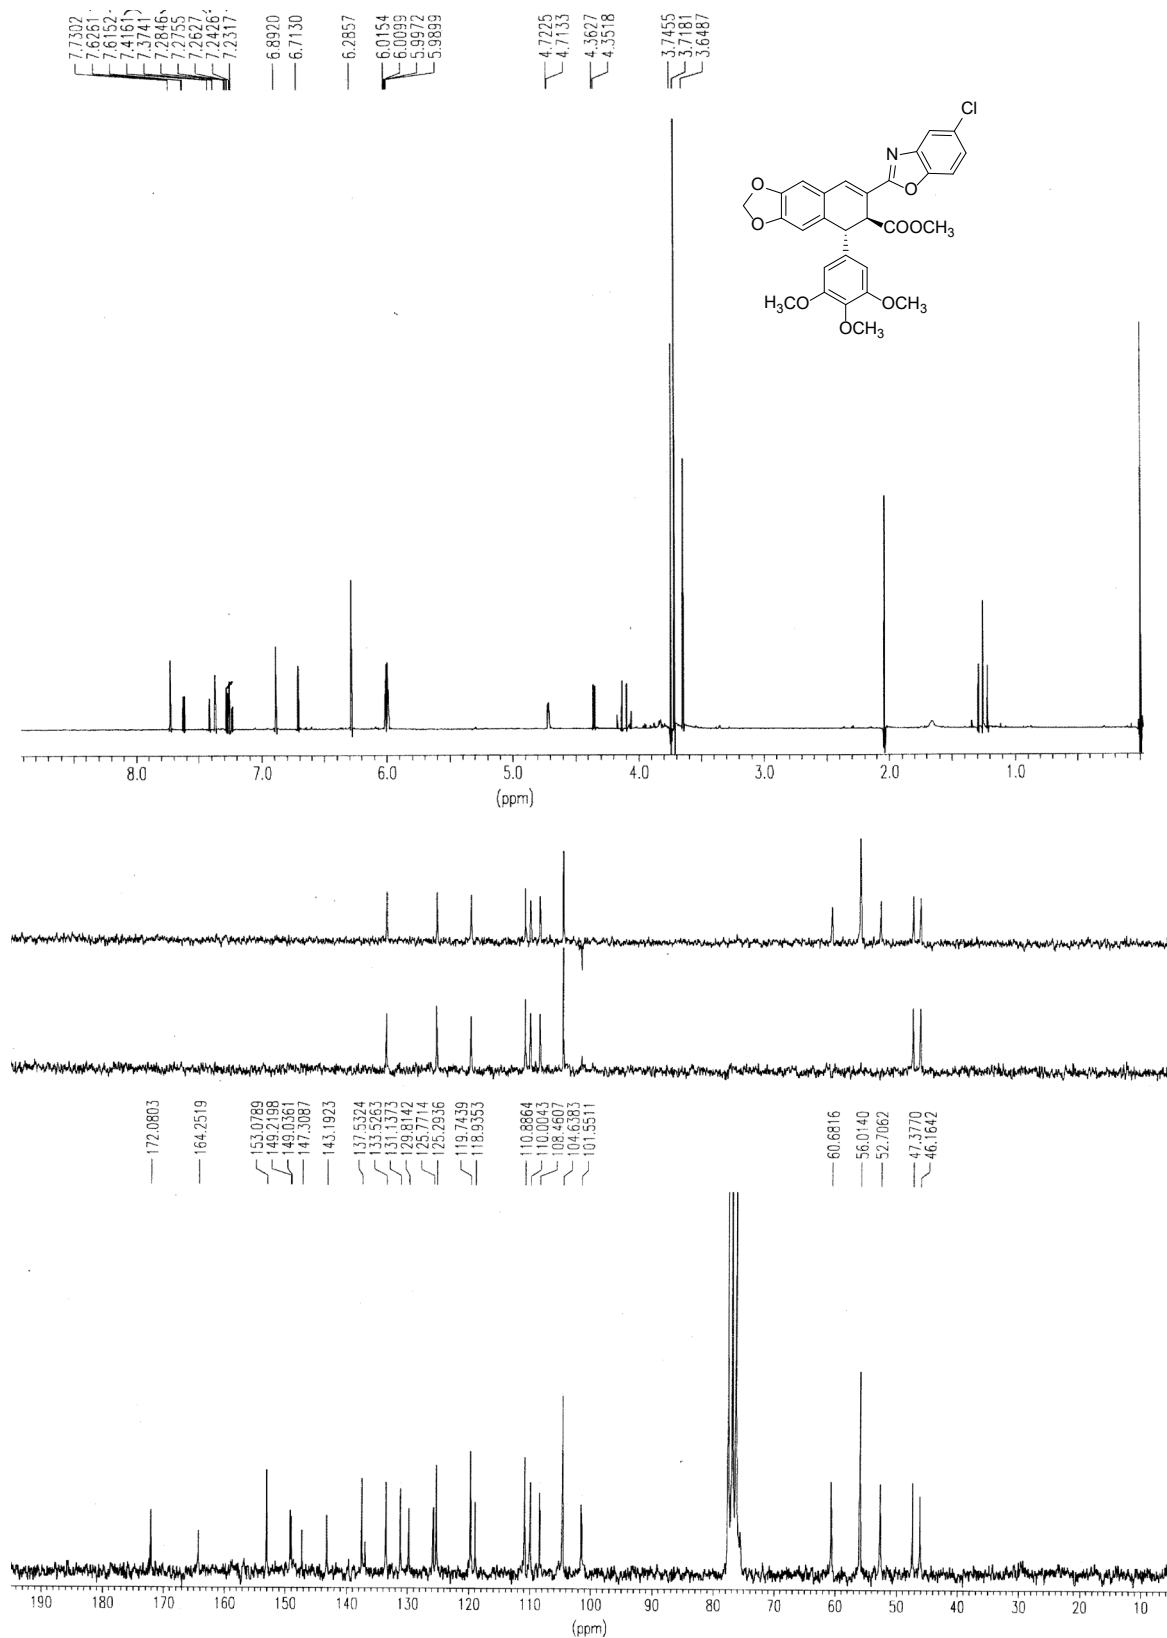

**Figure S29.** <sup>1</sup>H and <sup>13</sup>C for compound **18**

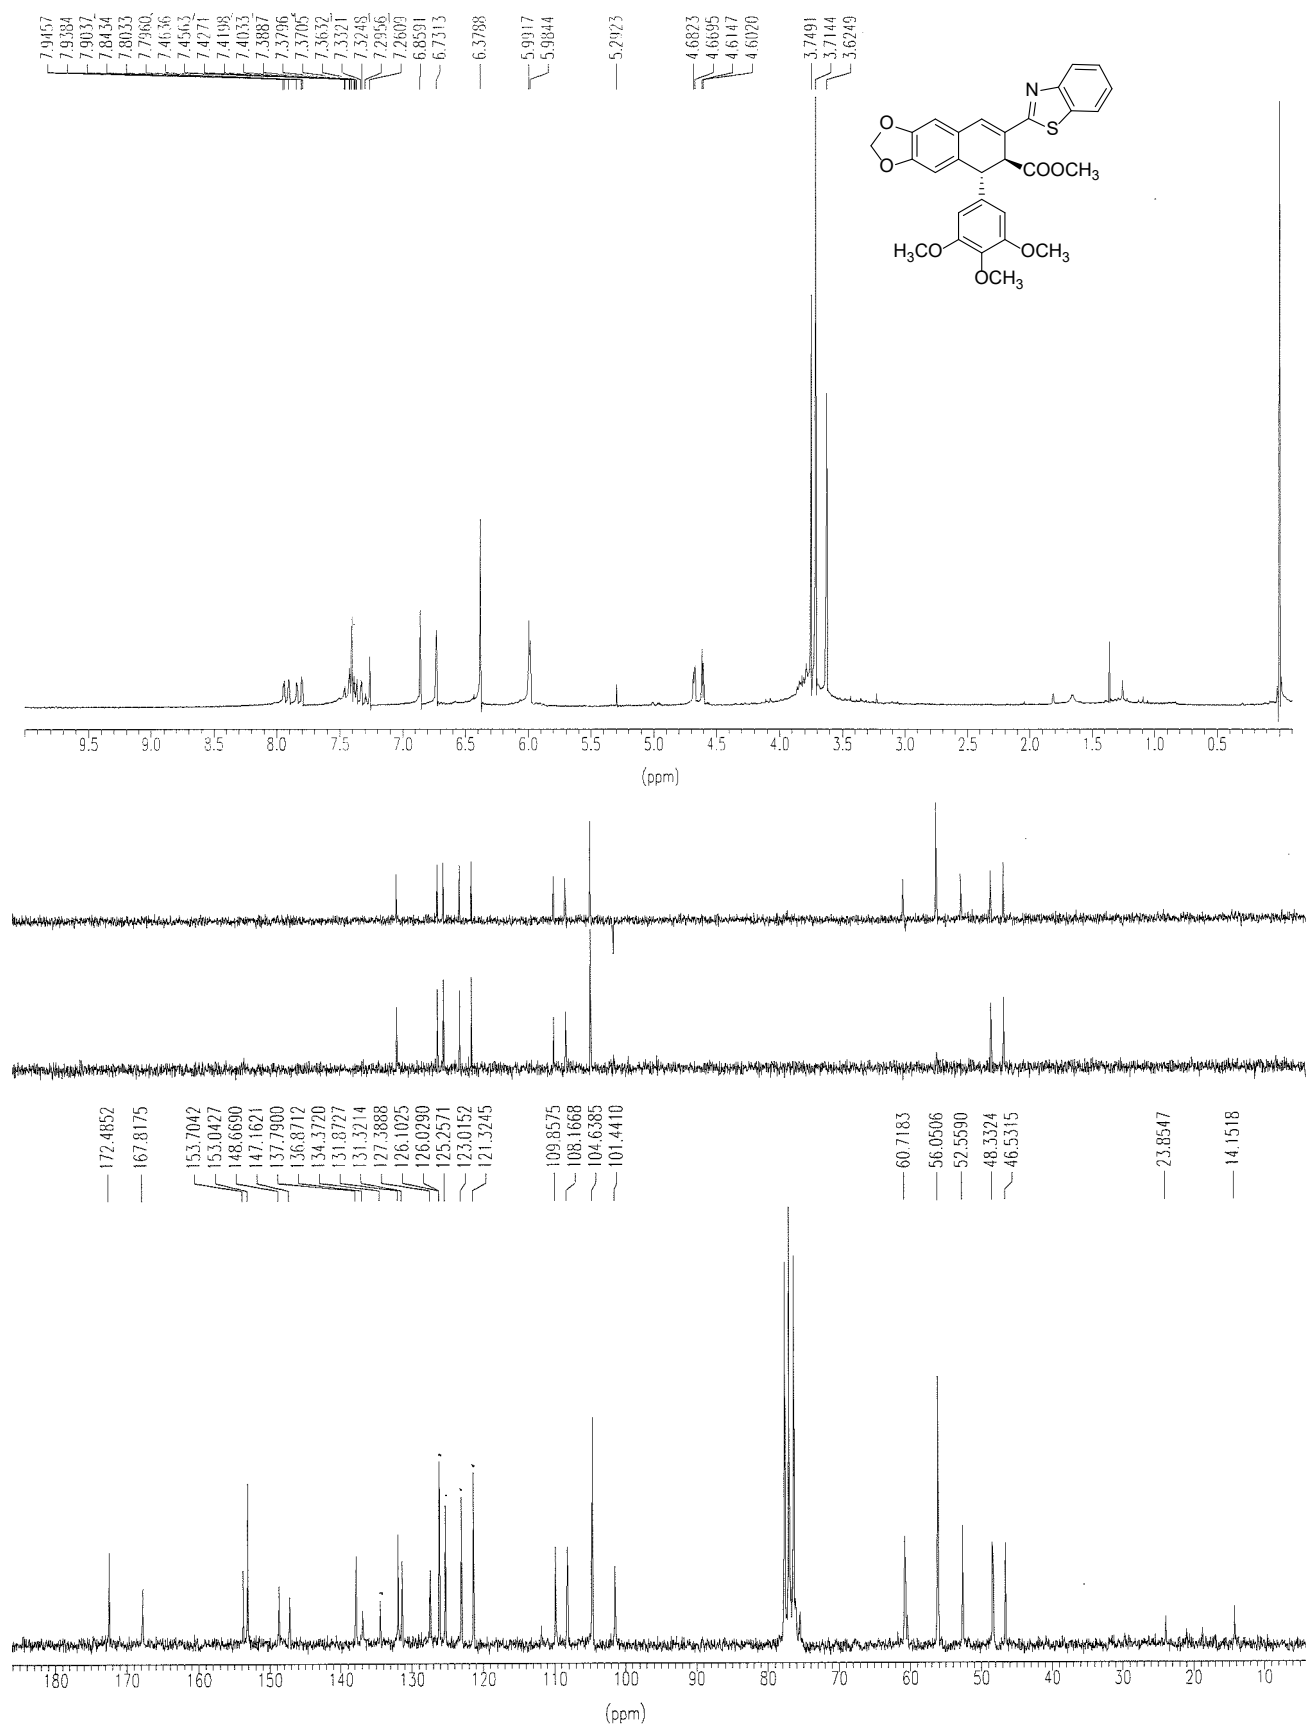

**Figure S30.** <sup>1</sup>H and <sup>13</sup>C for compound **19**

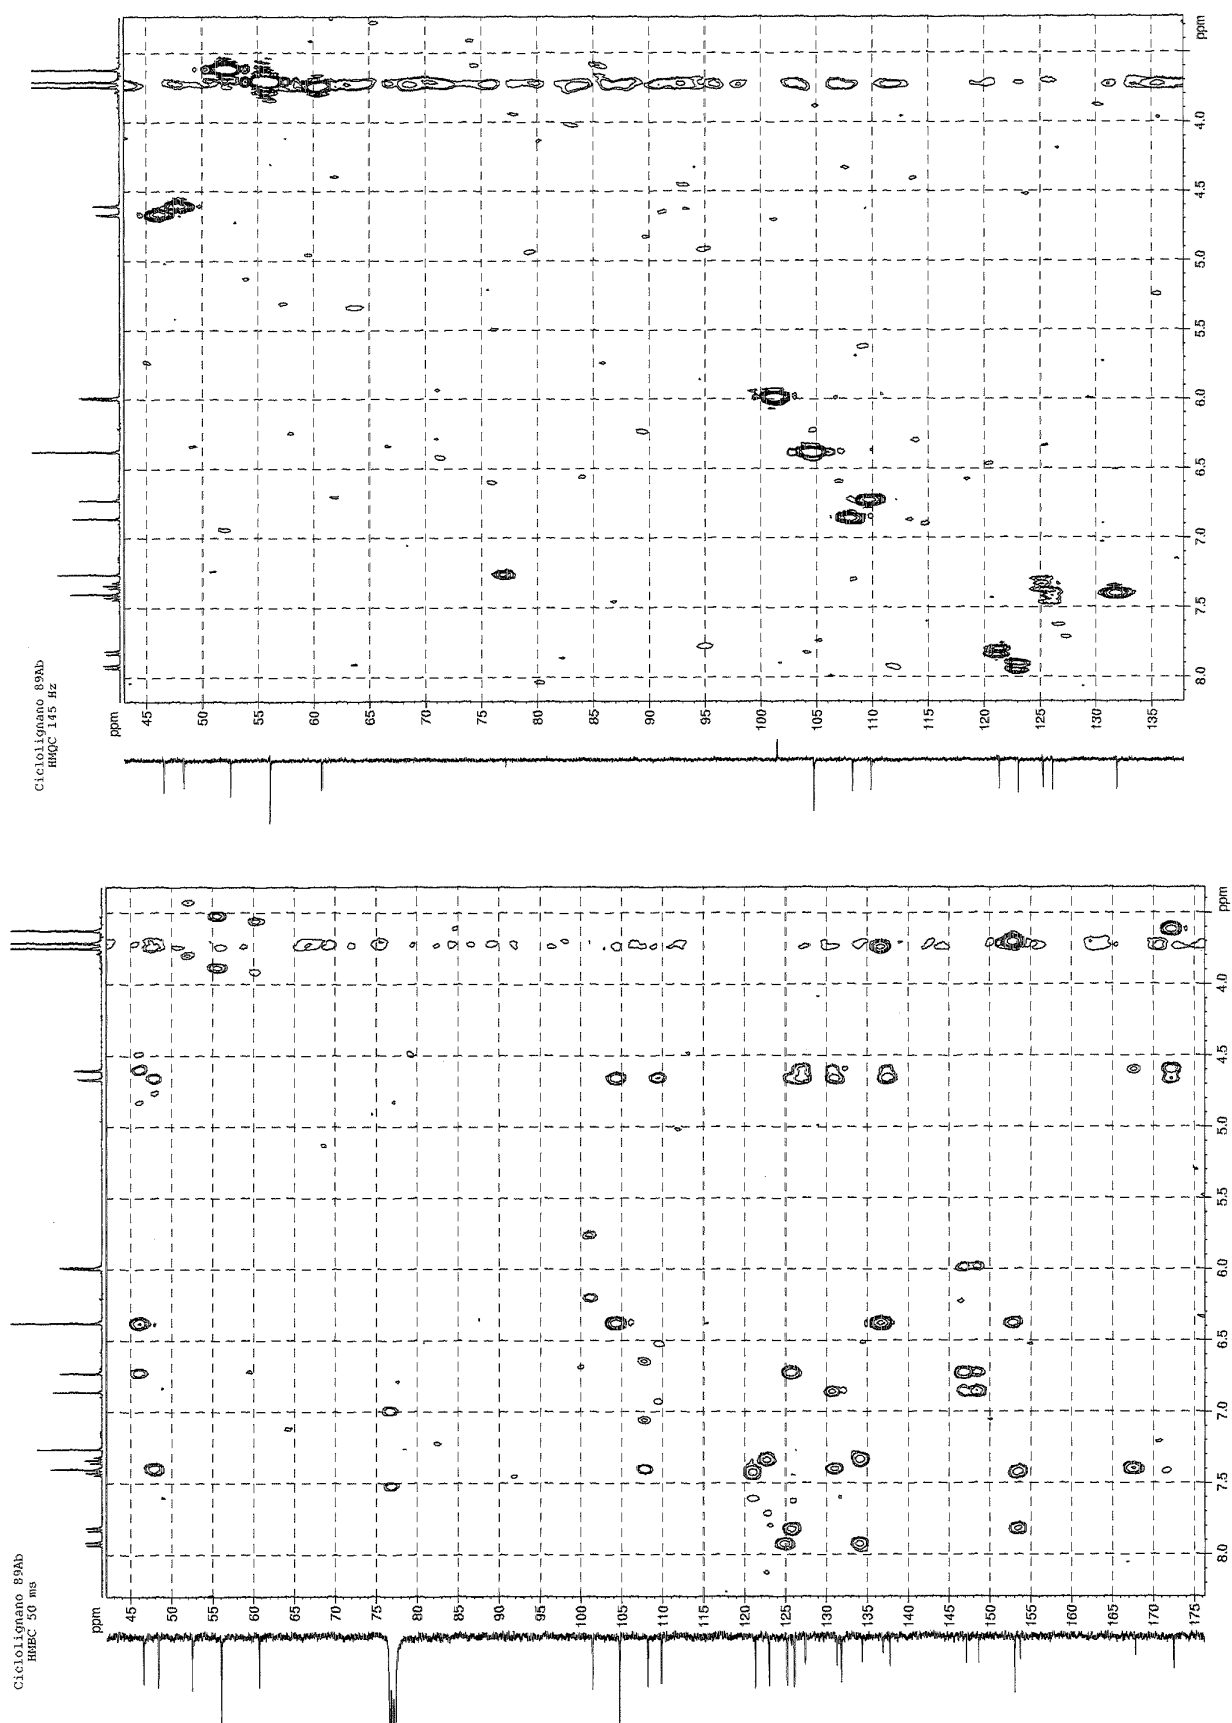

**Figure S31.** HMBC and HMQC for compound 19

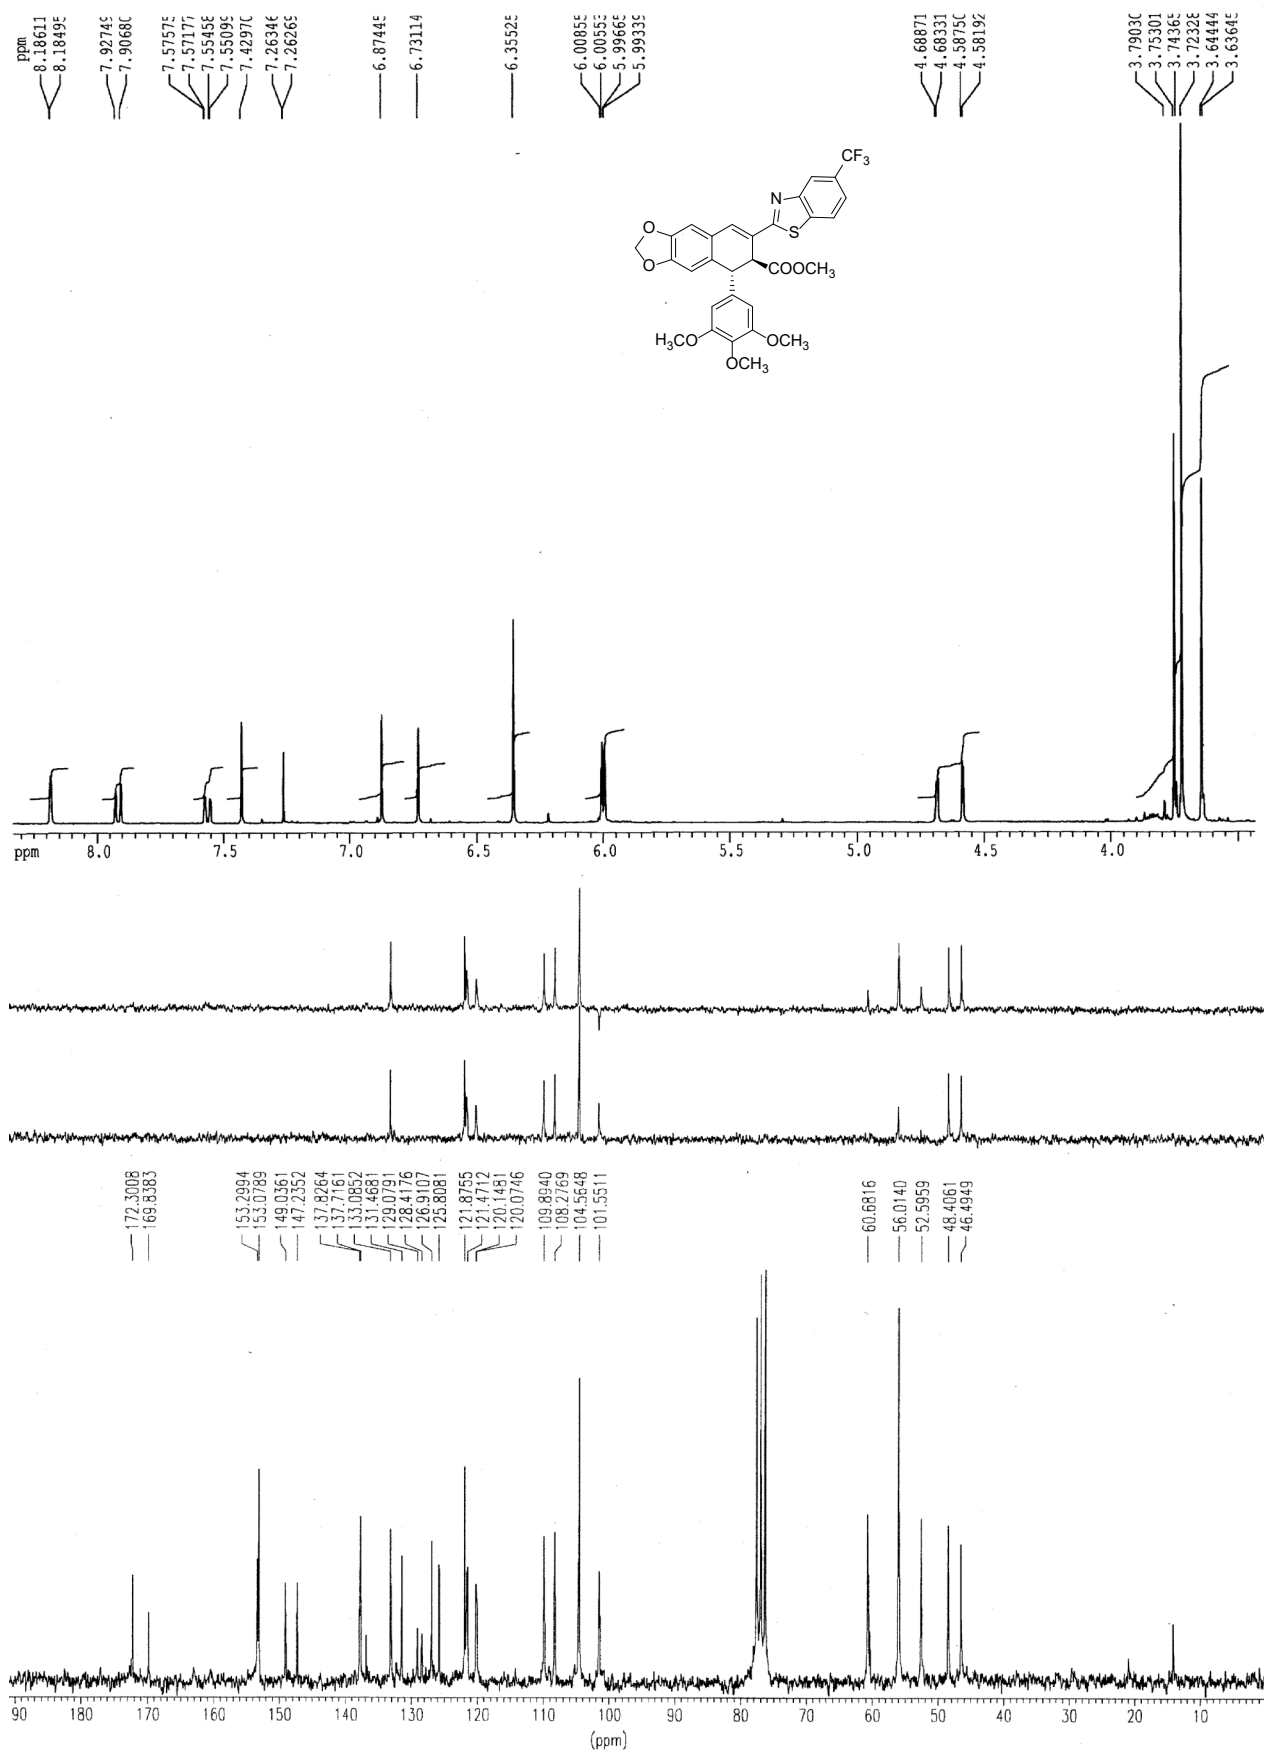

Figure S32. <sup>1</sup>H and <sup>13</sup>C for compound 20

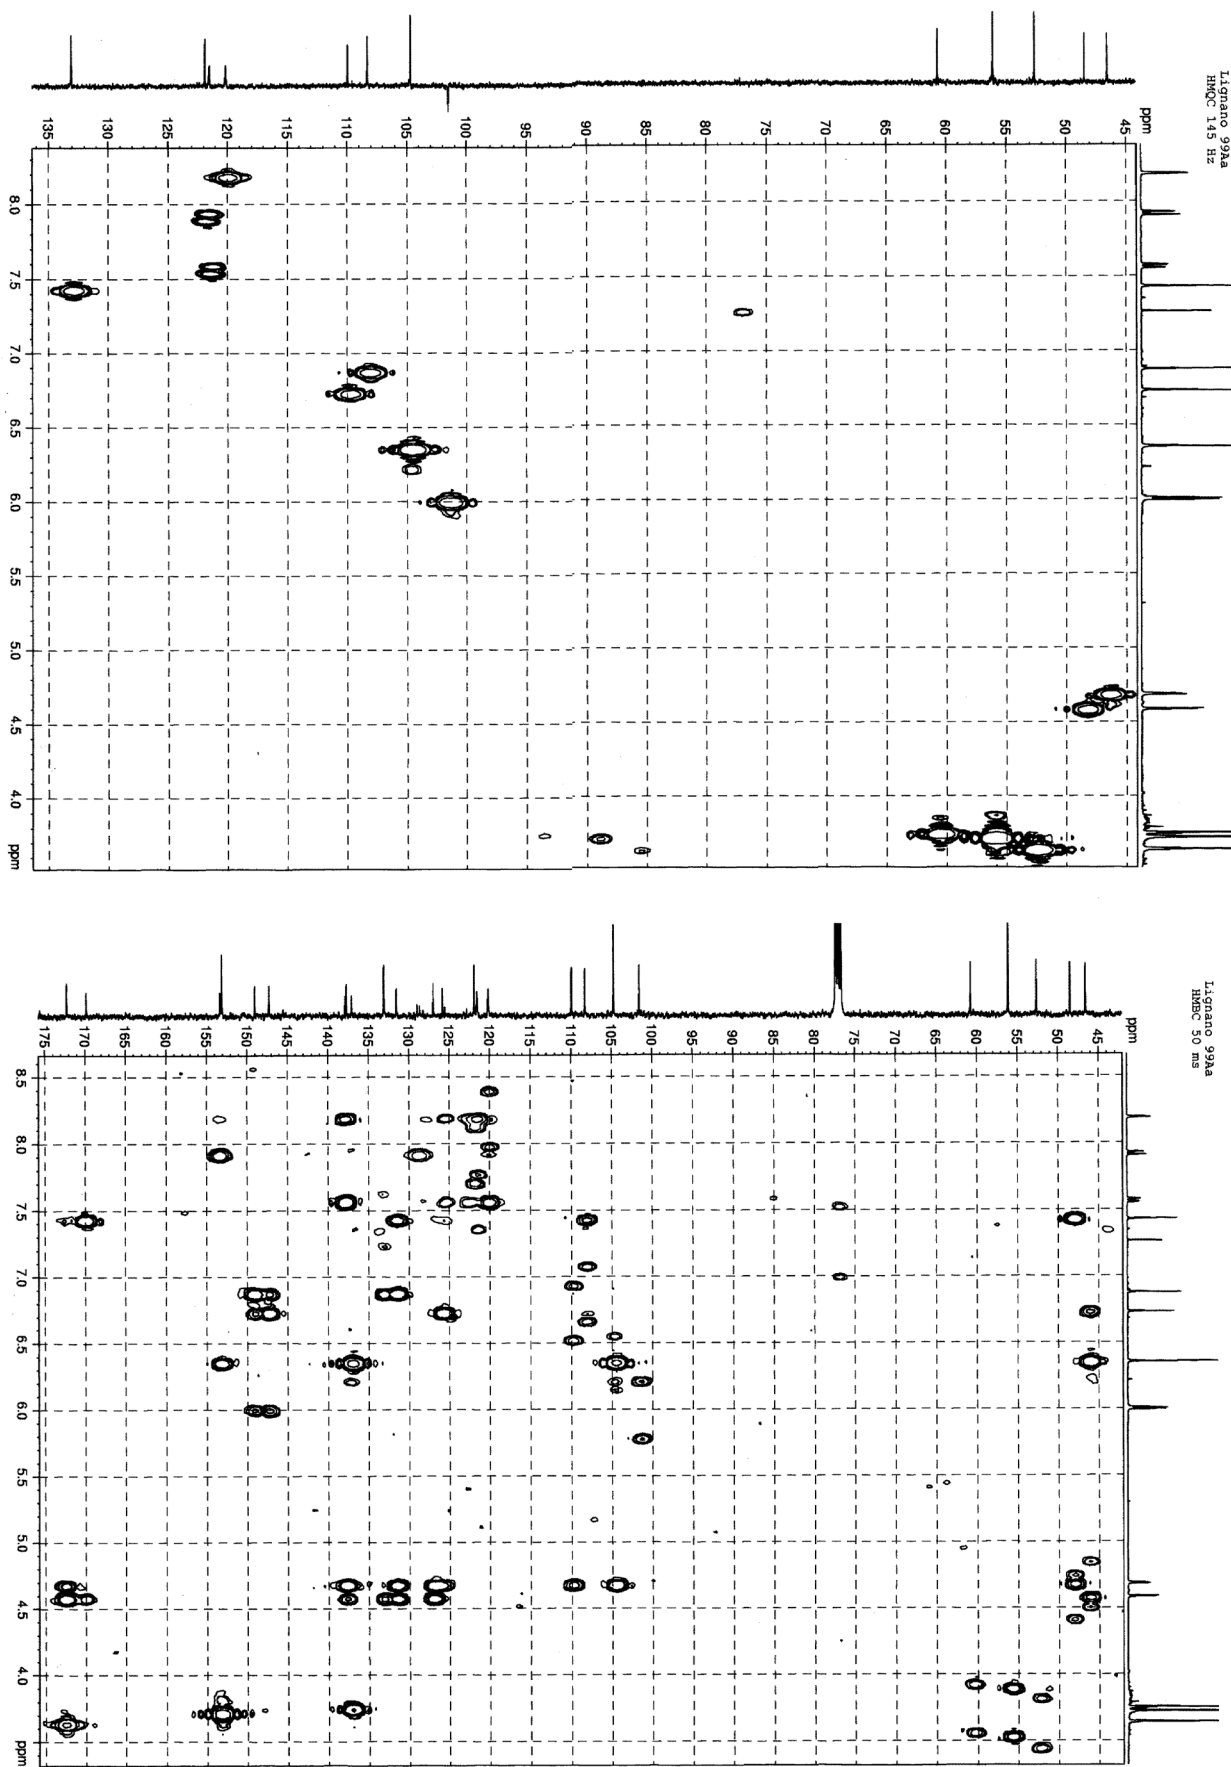

Figure S33. HMQC and HMBC for compound 20

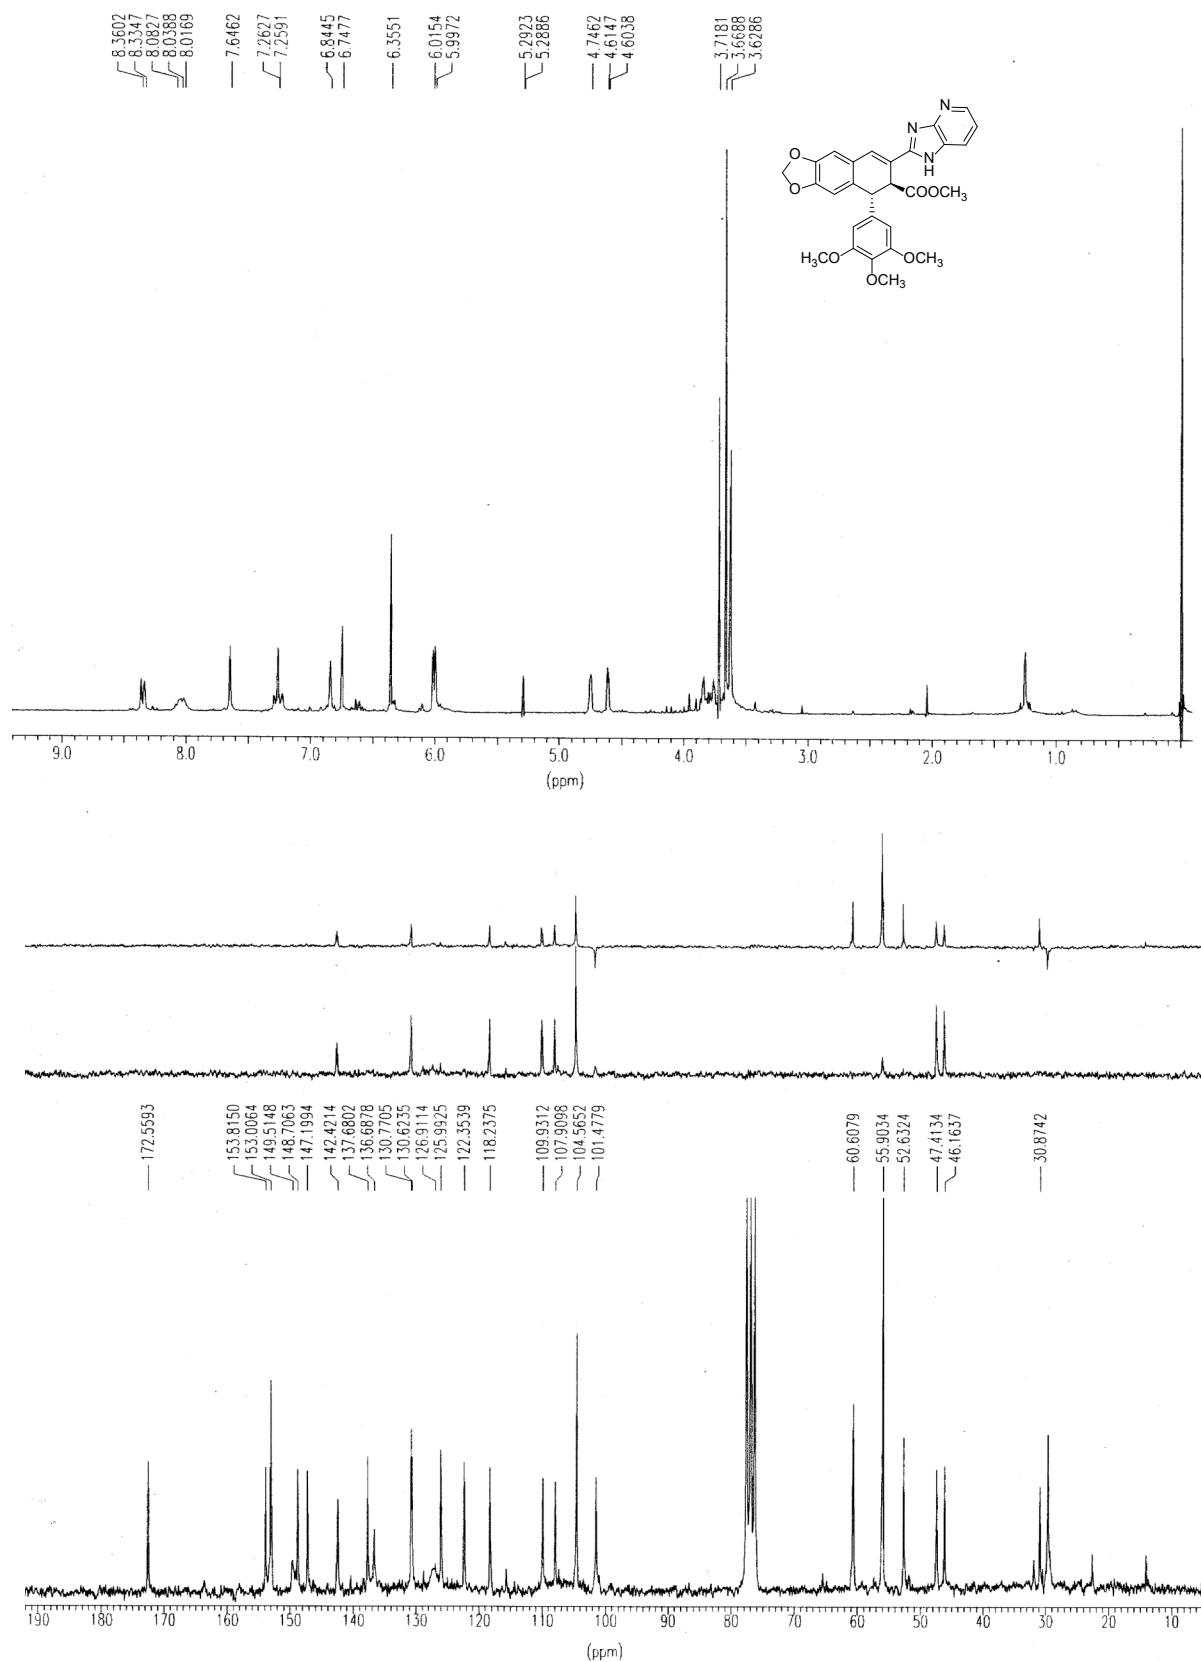

**Figure S34.** <sup>1</sup>H and <sup>13</sup>C for compound **21**



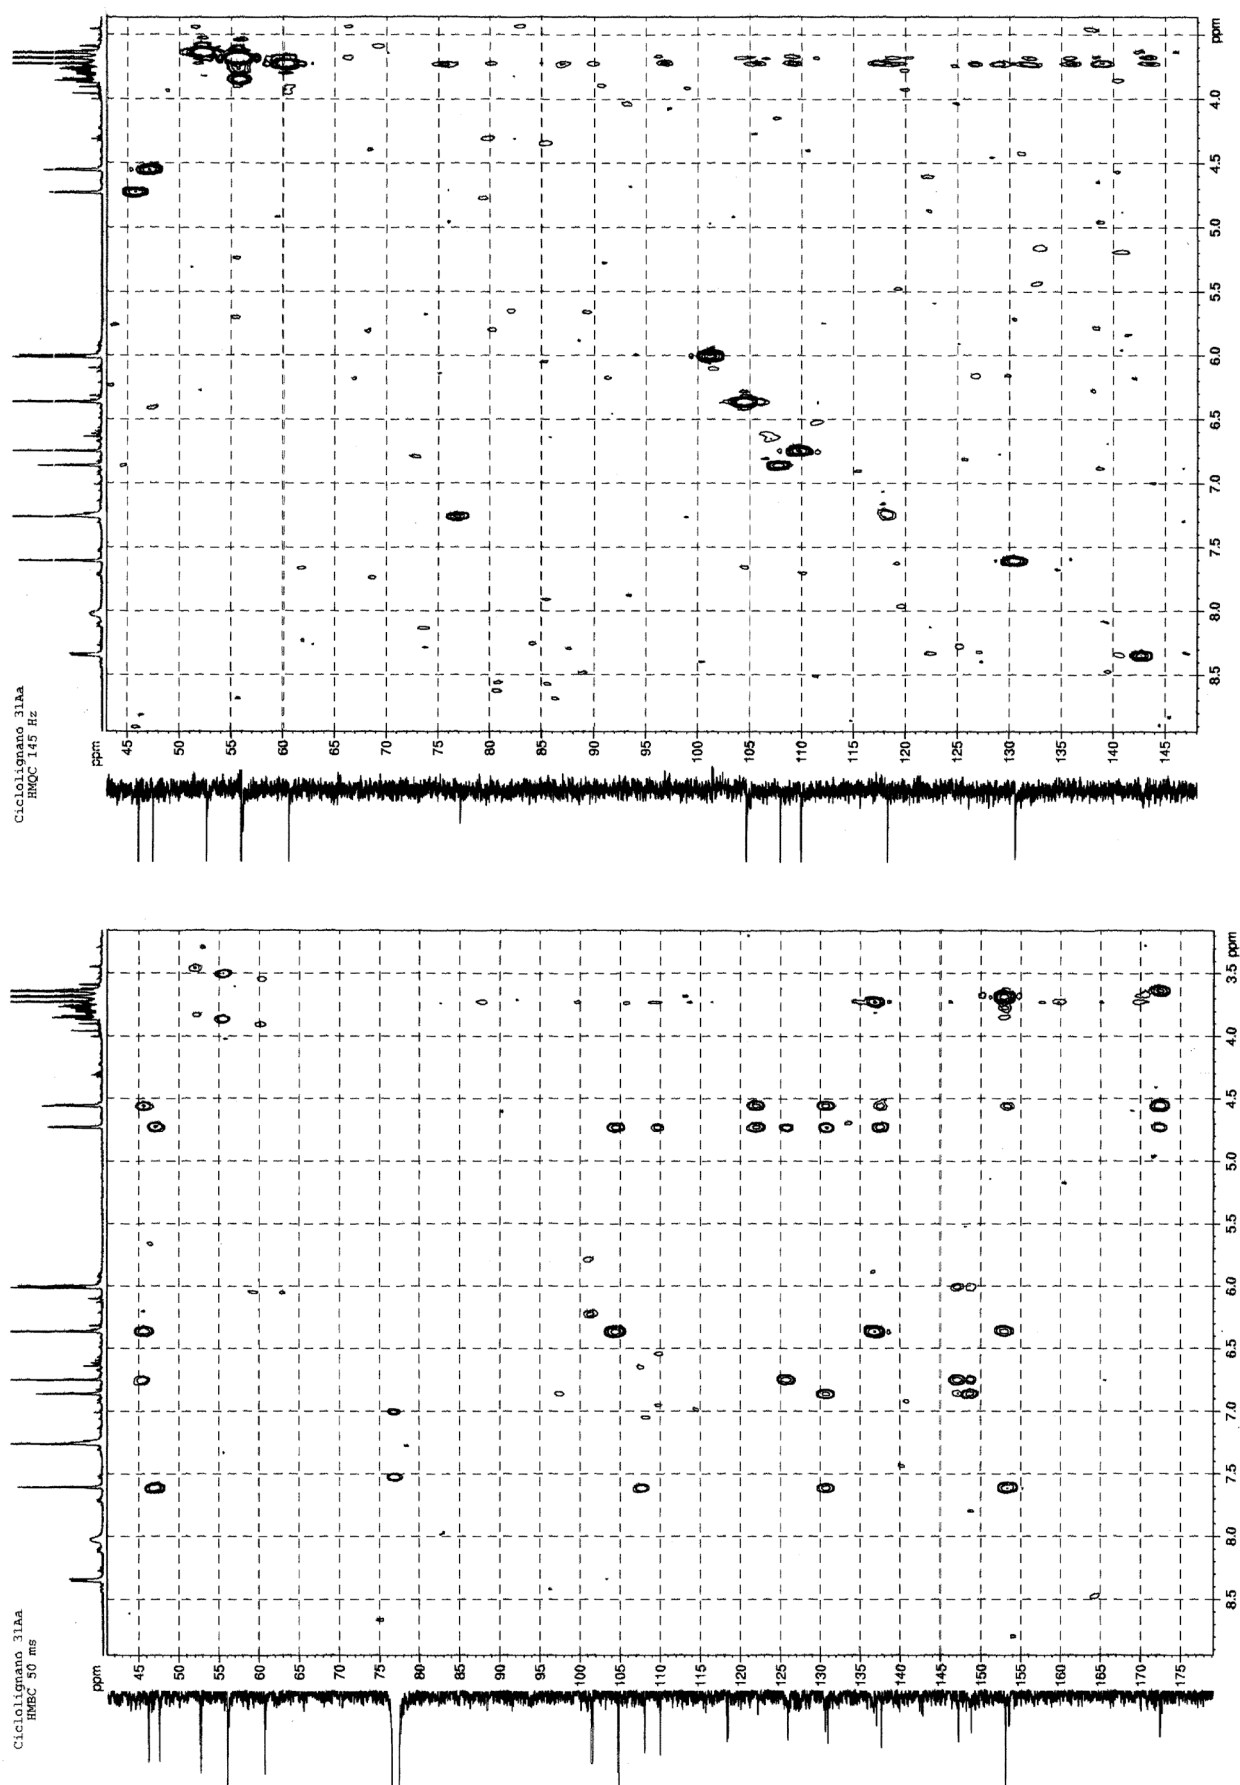

Figure S35. HMBC and HMQC for compound 21

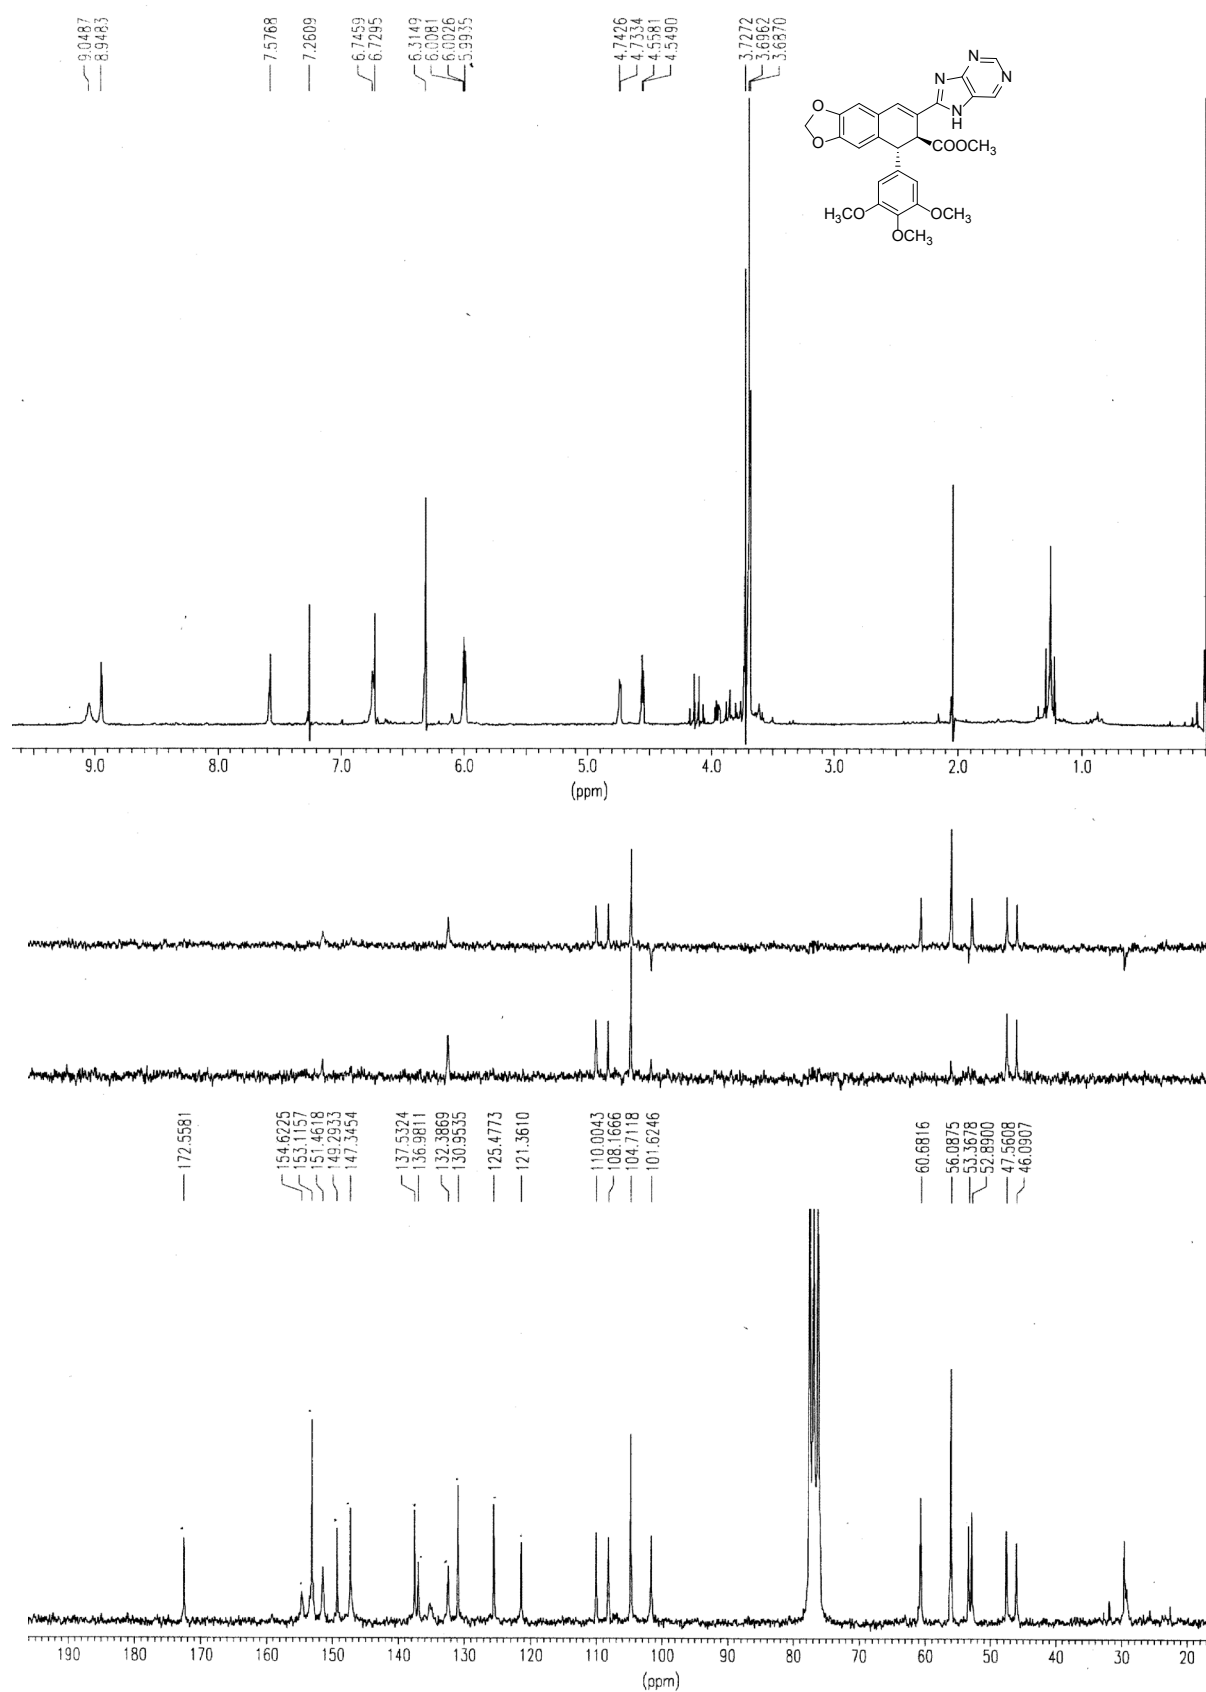

**Figure S36.** <sup>1</sup>H and <sup>13</sup>C for compound **22**

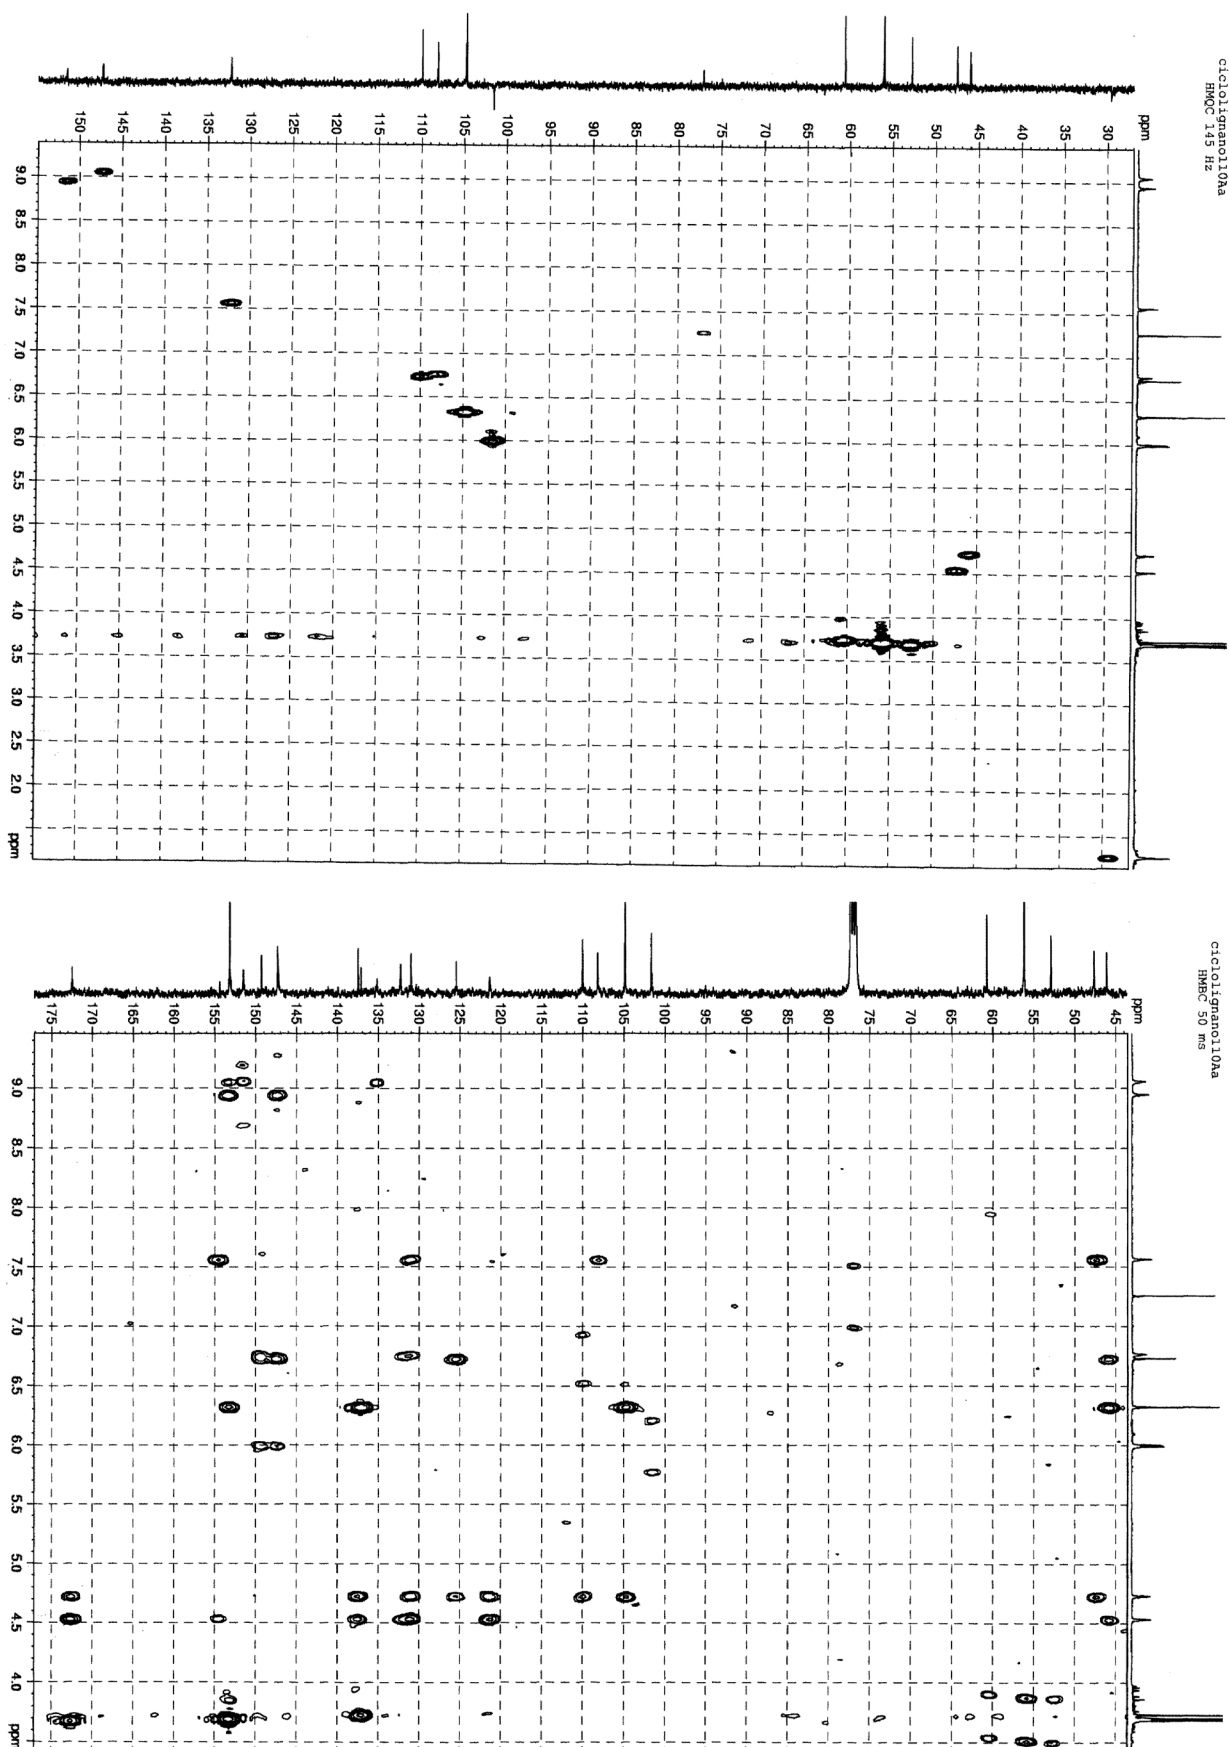

Figure S37. HMQC and HMBC for compound 22

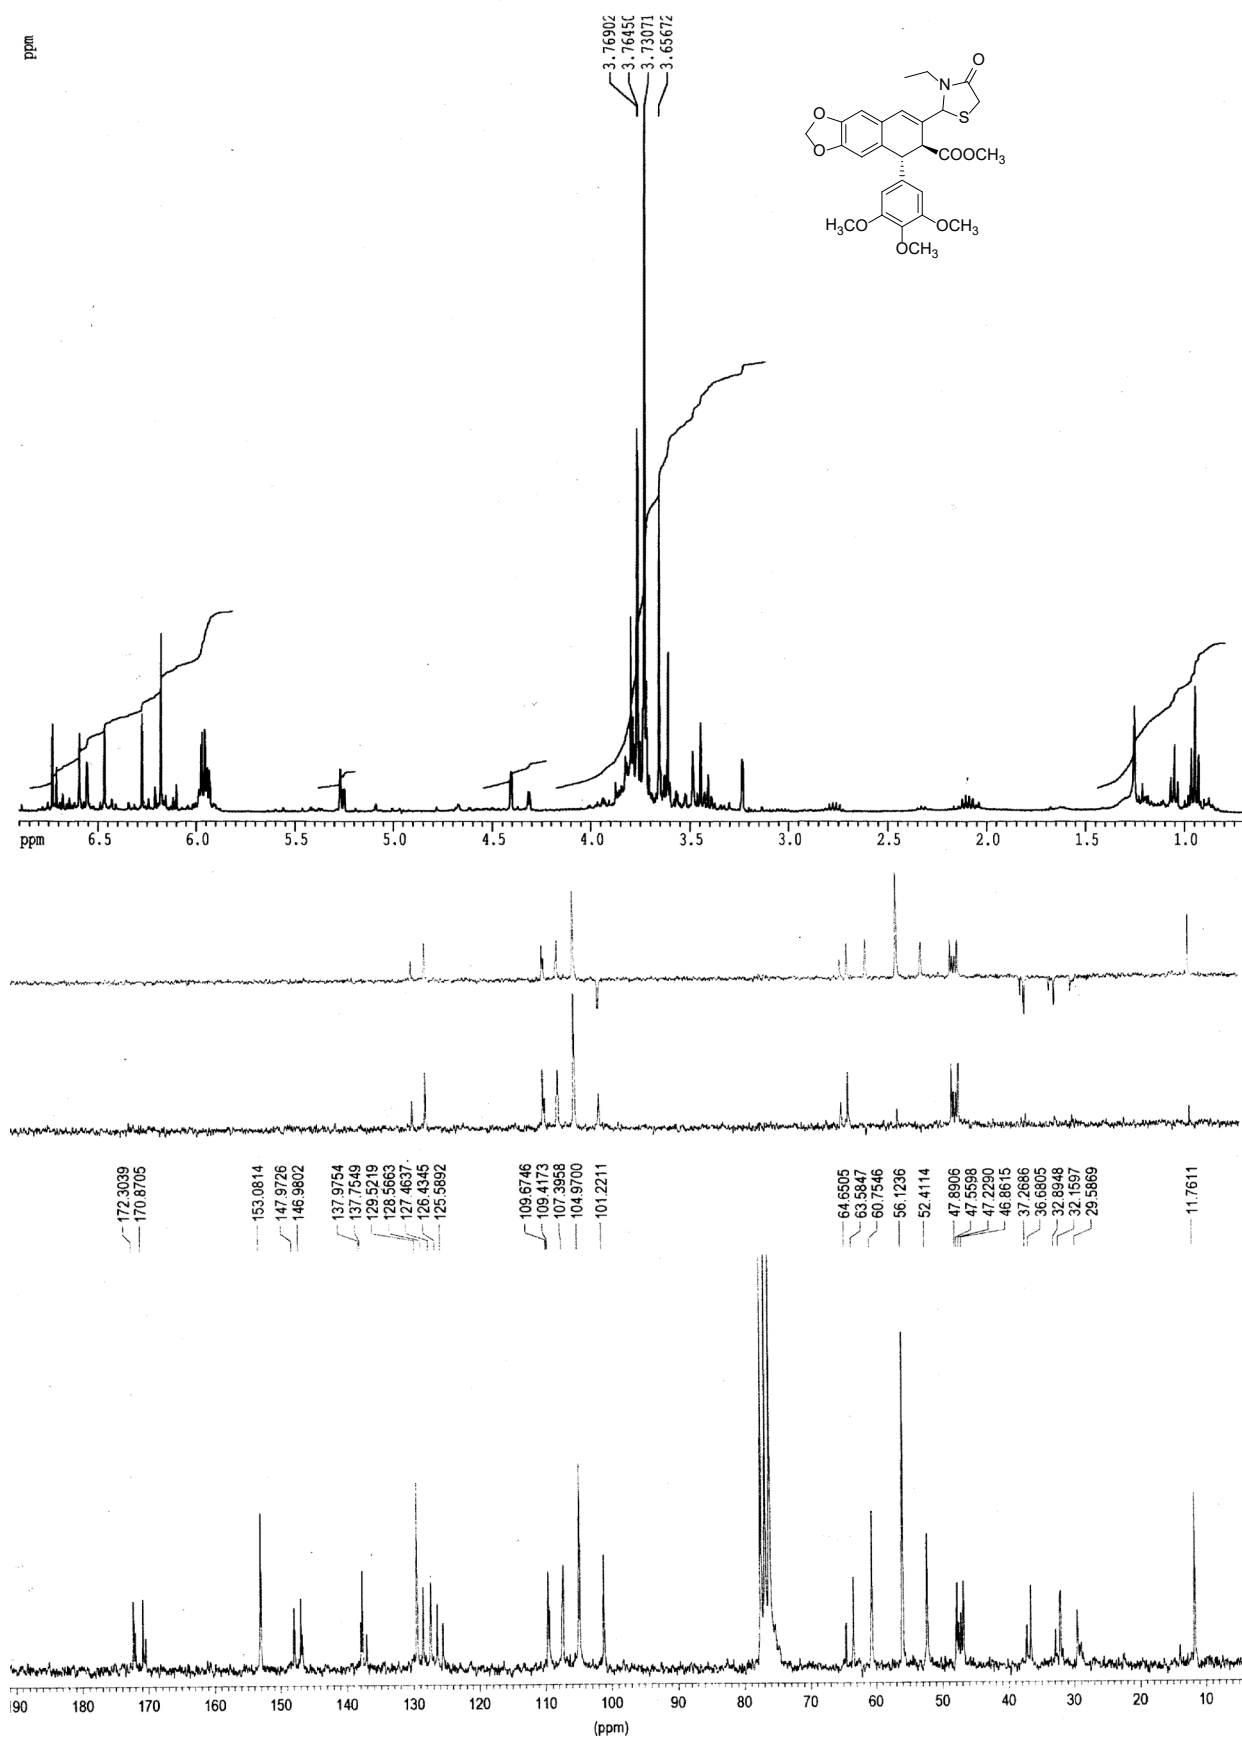

Figure S38.  $^1\text{H}$  and  $^{13}\text{C}$  for compound 28

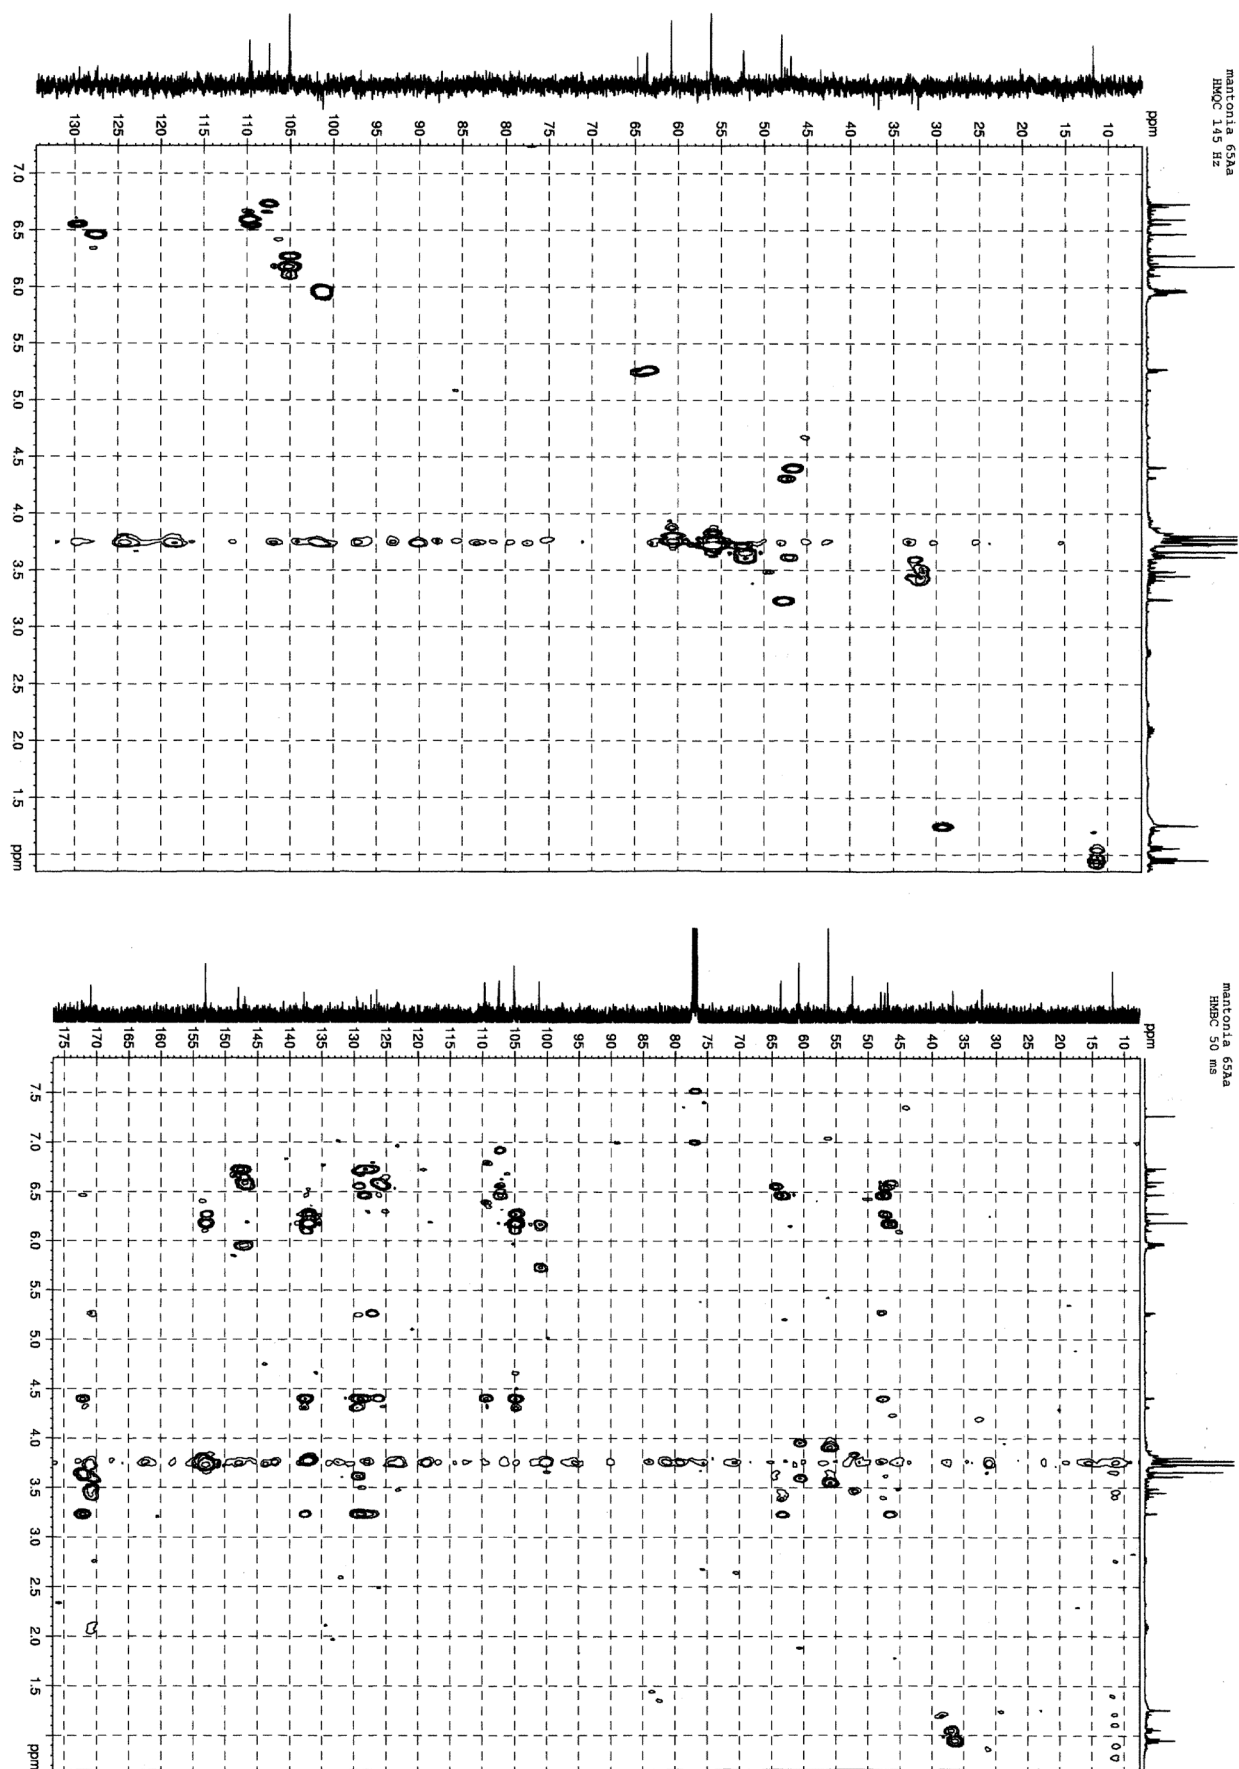

Figure S39. HMQC and HMBC for compound 28

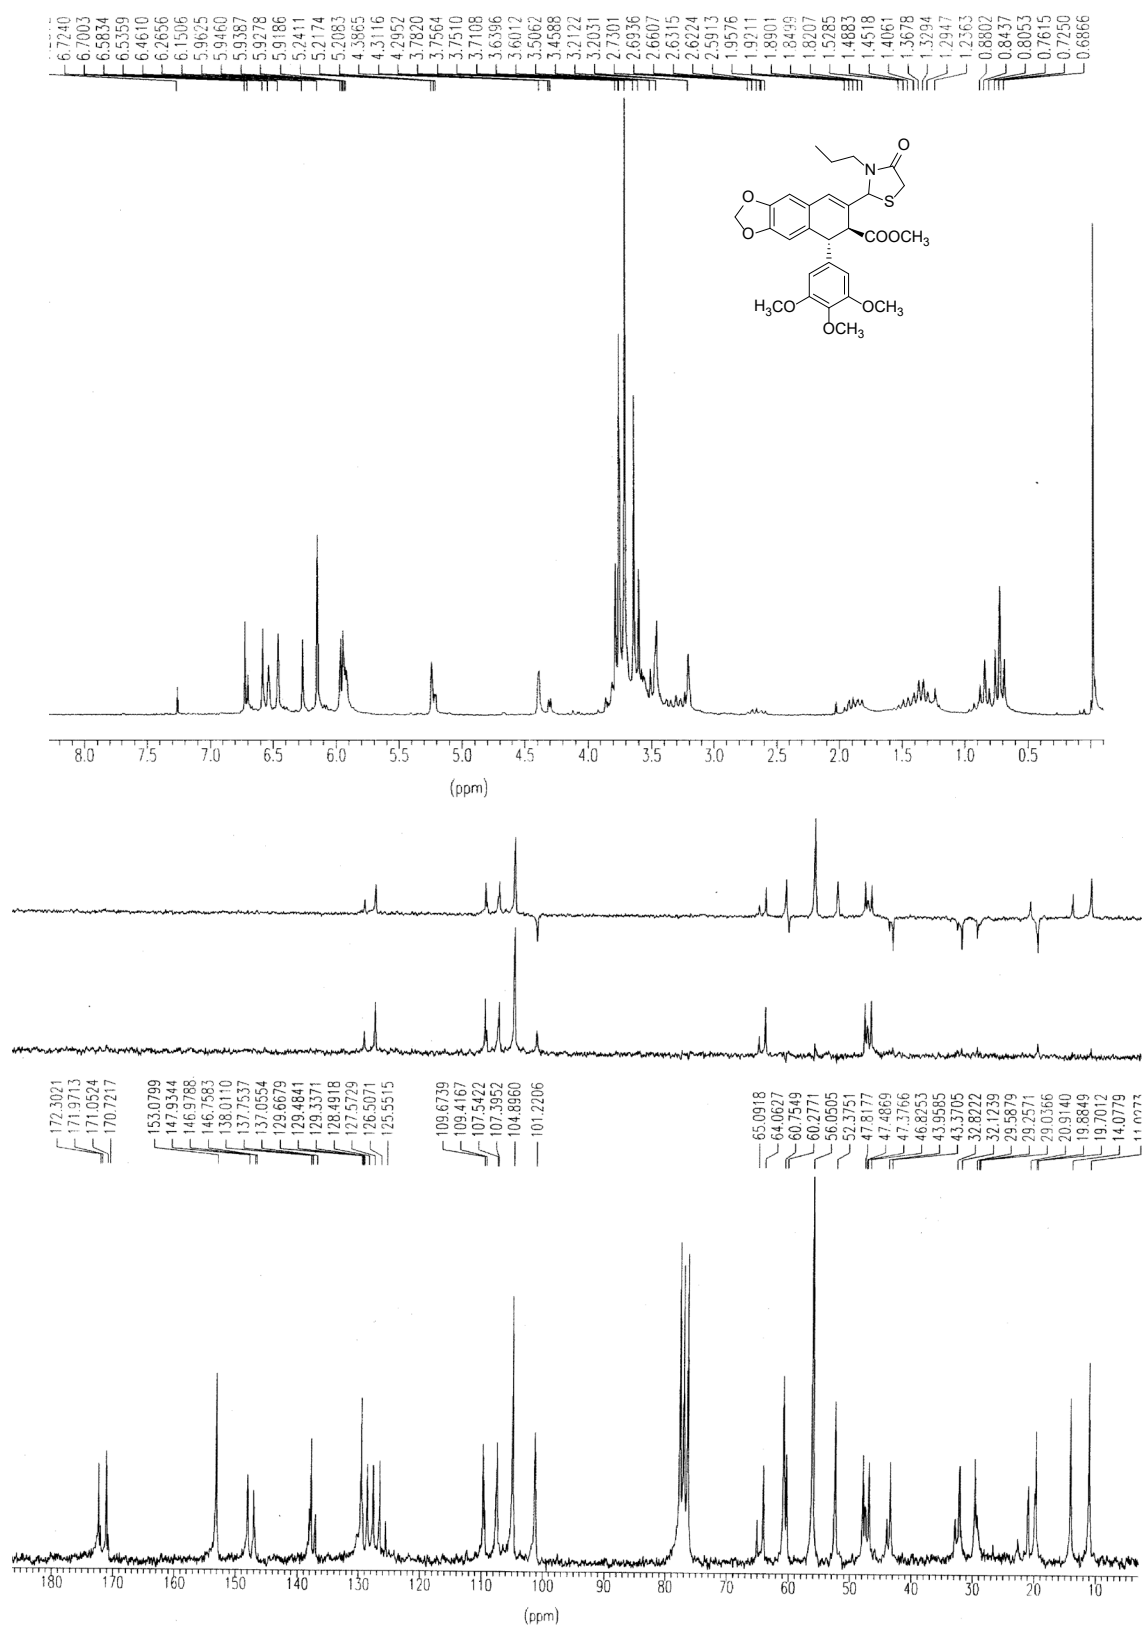

Figure S40. <sup>1</sup>H and <sup>13</sup>C for compound 29

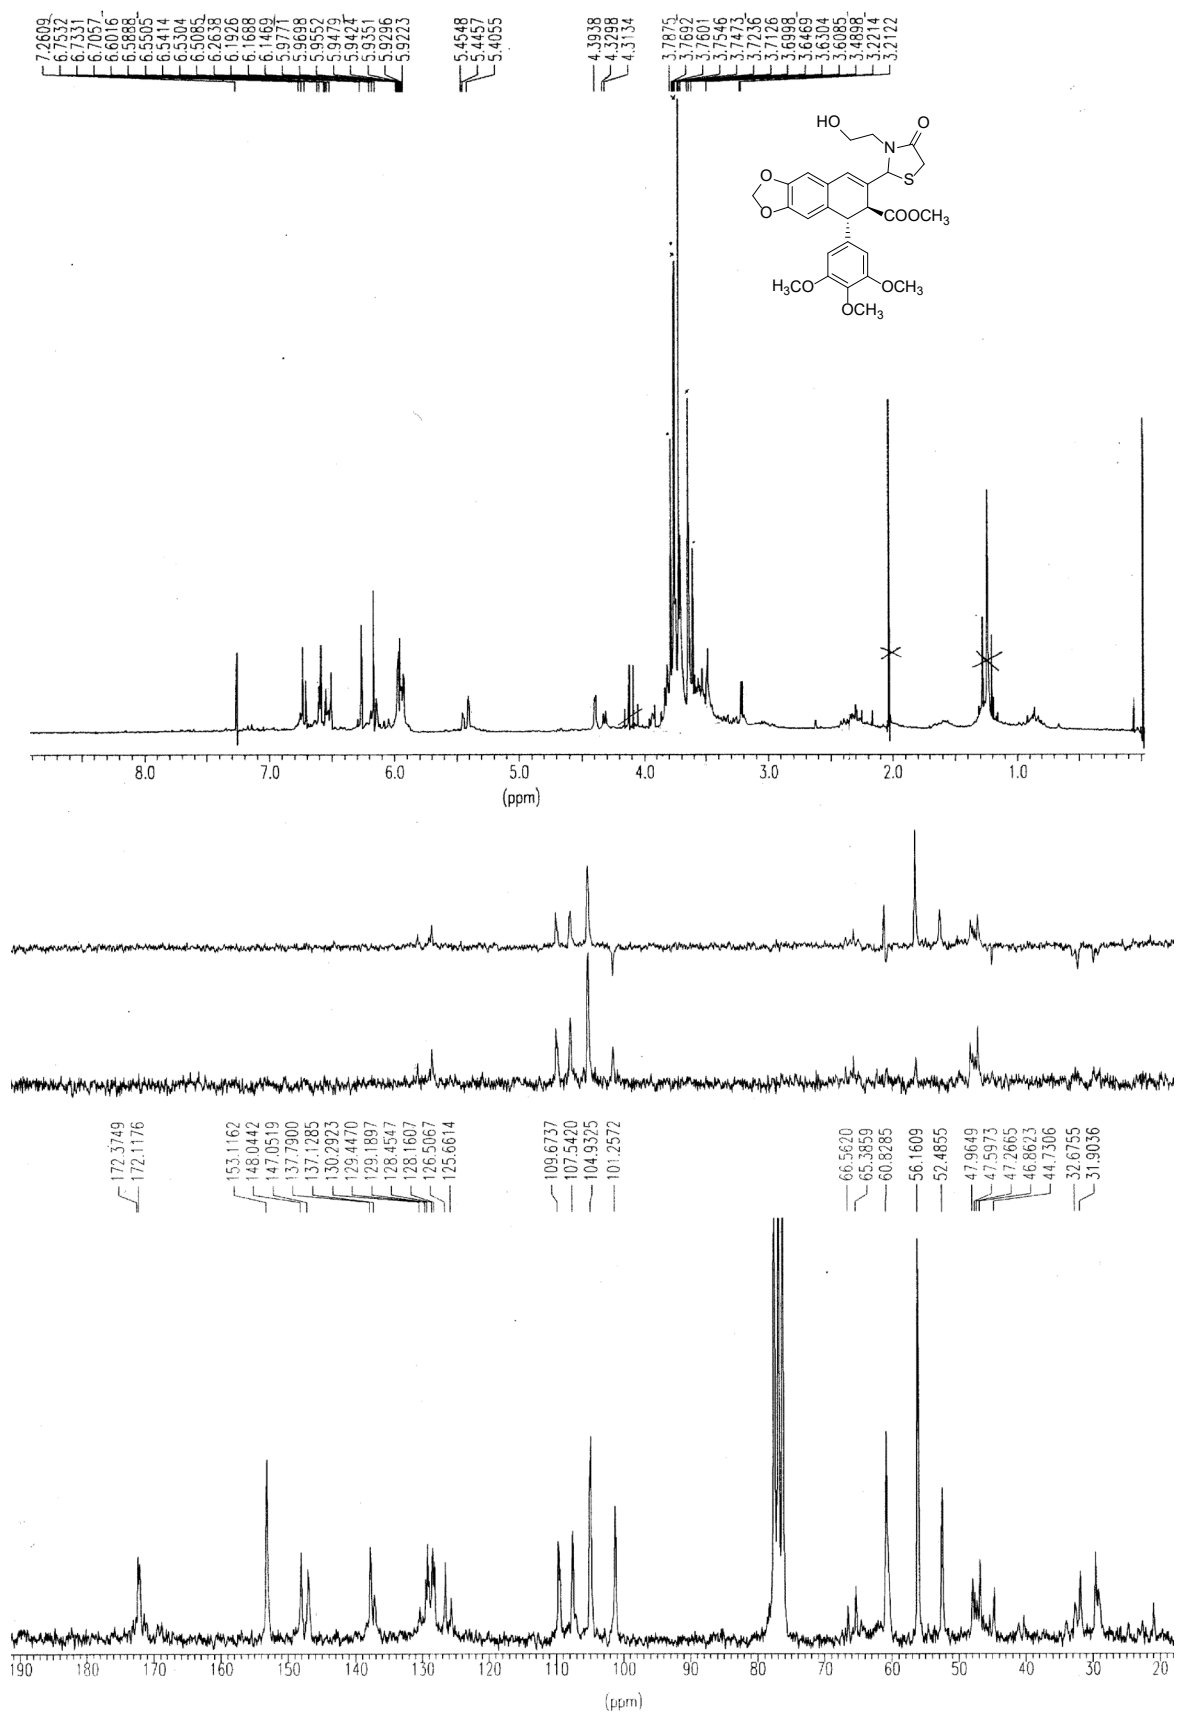

**Figure S41.** <sup>1</sup>H and <sup>13</sup>C for compound **30**

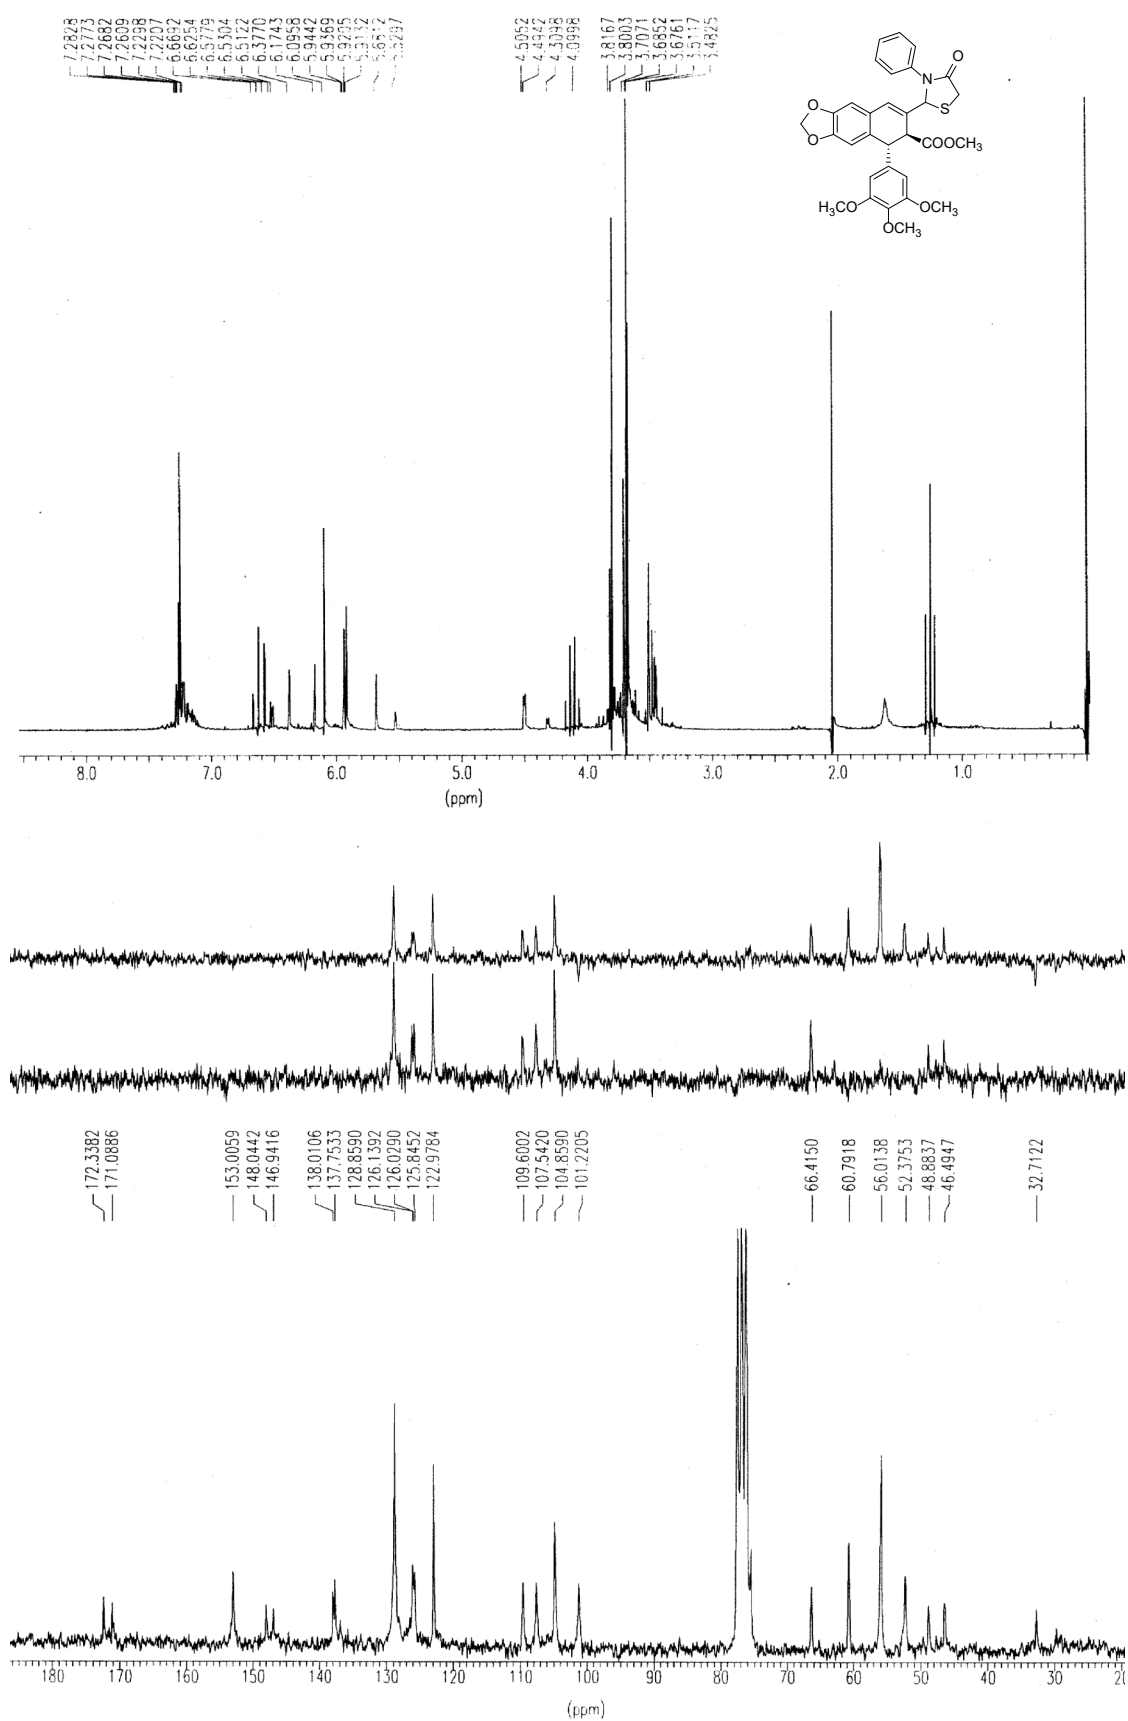

Figure S42. <sup>1</sup>H and <sup>13</sup>C for compound **31**



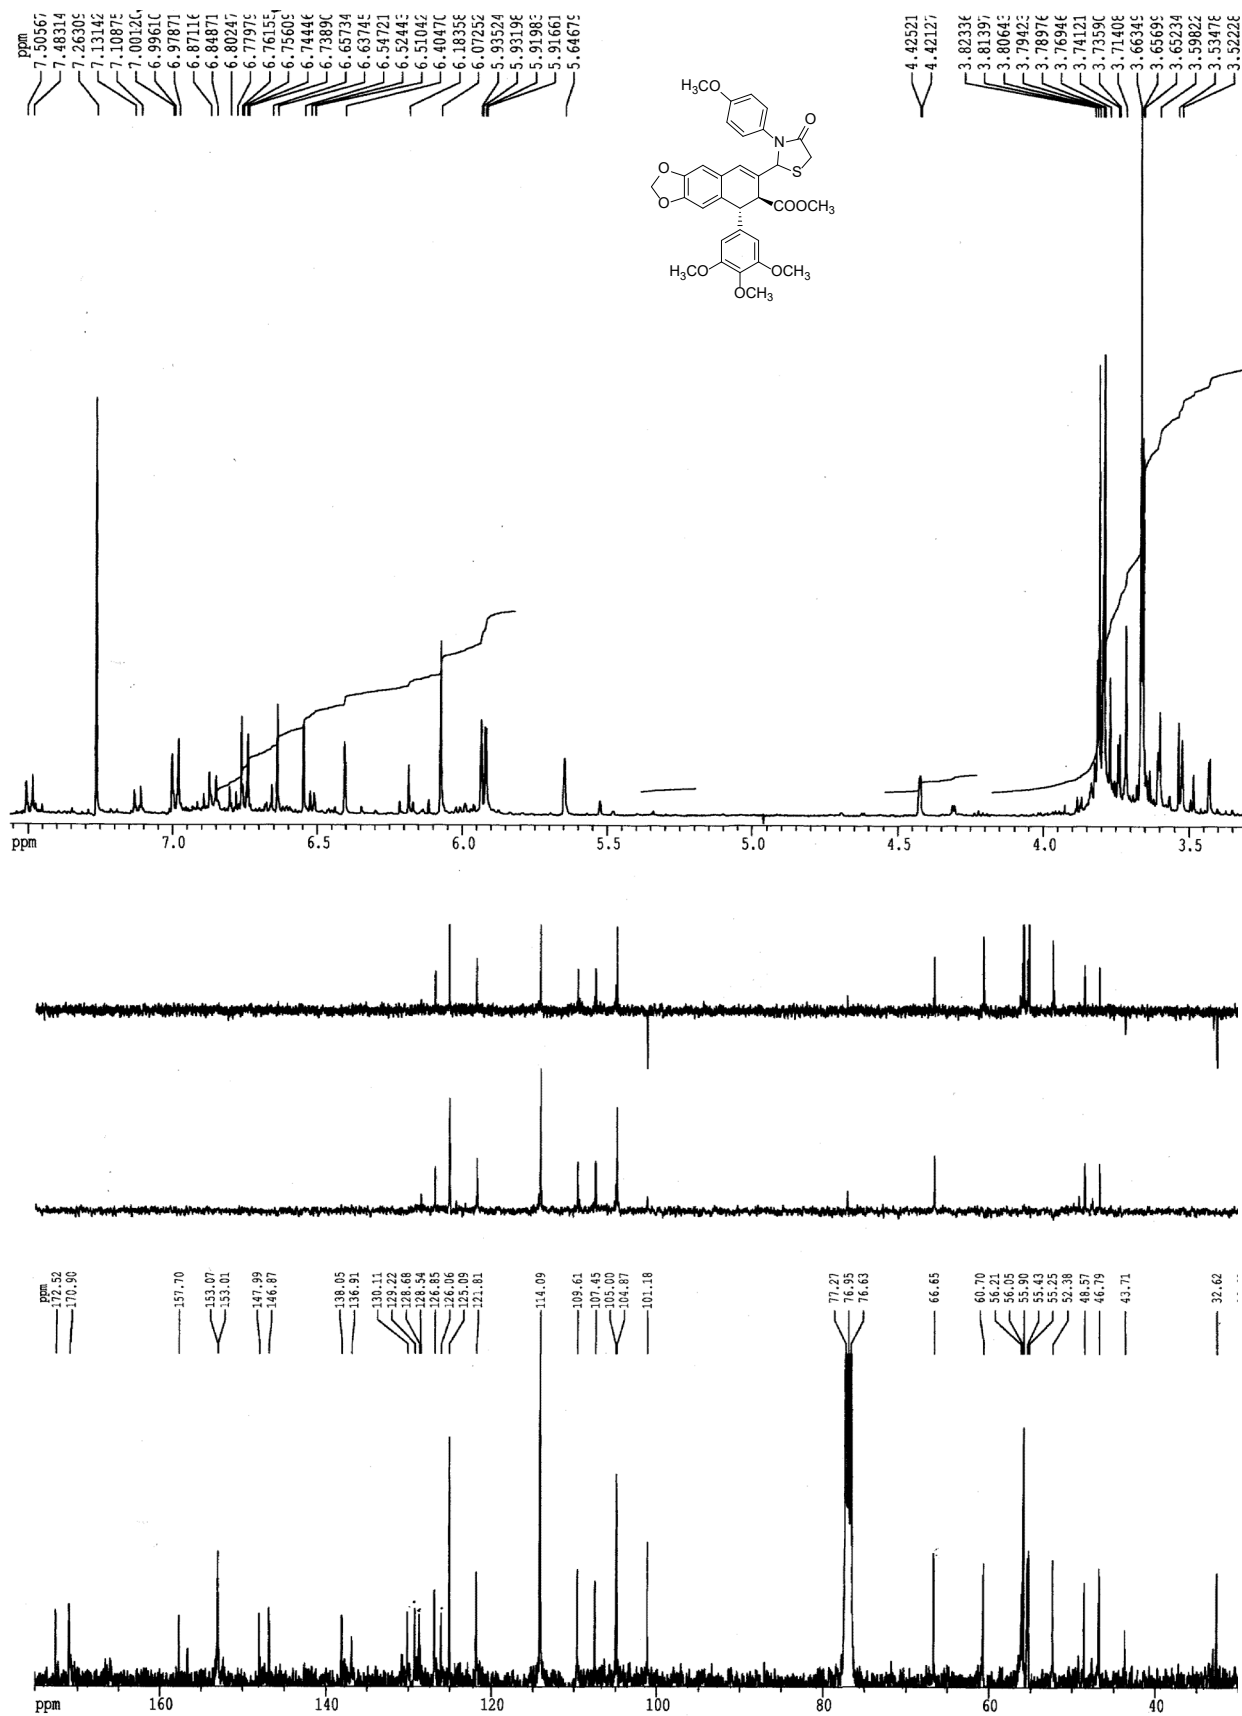

Figure S43. <sup>1</sup>H and <sup>13</sup>C for compound 32

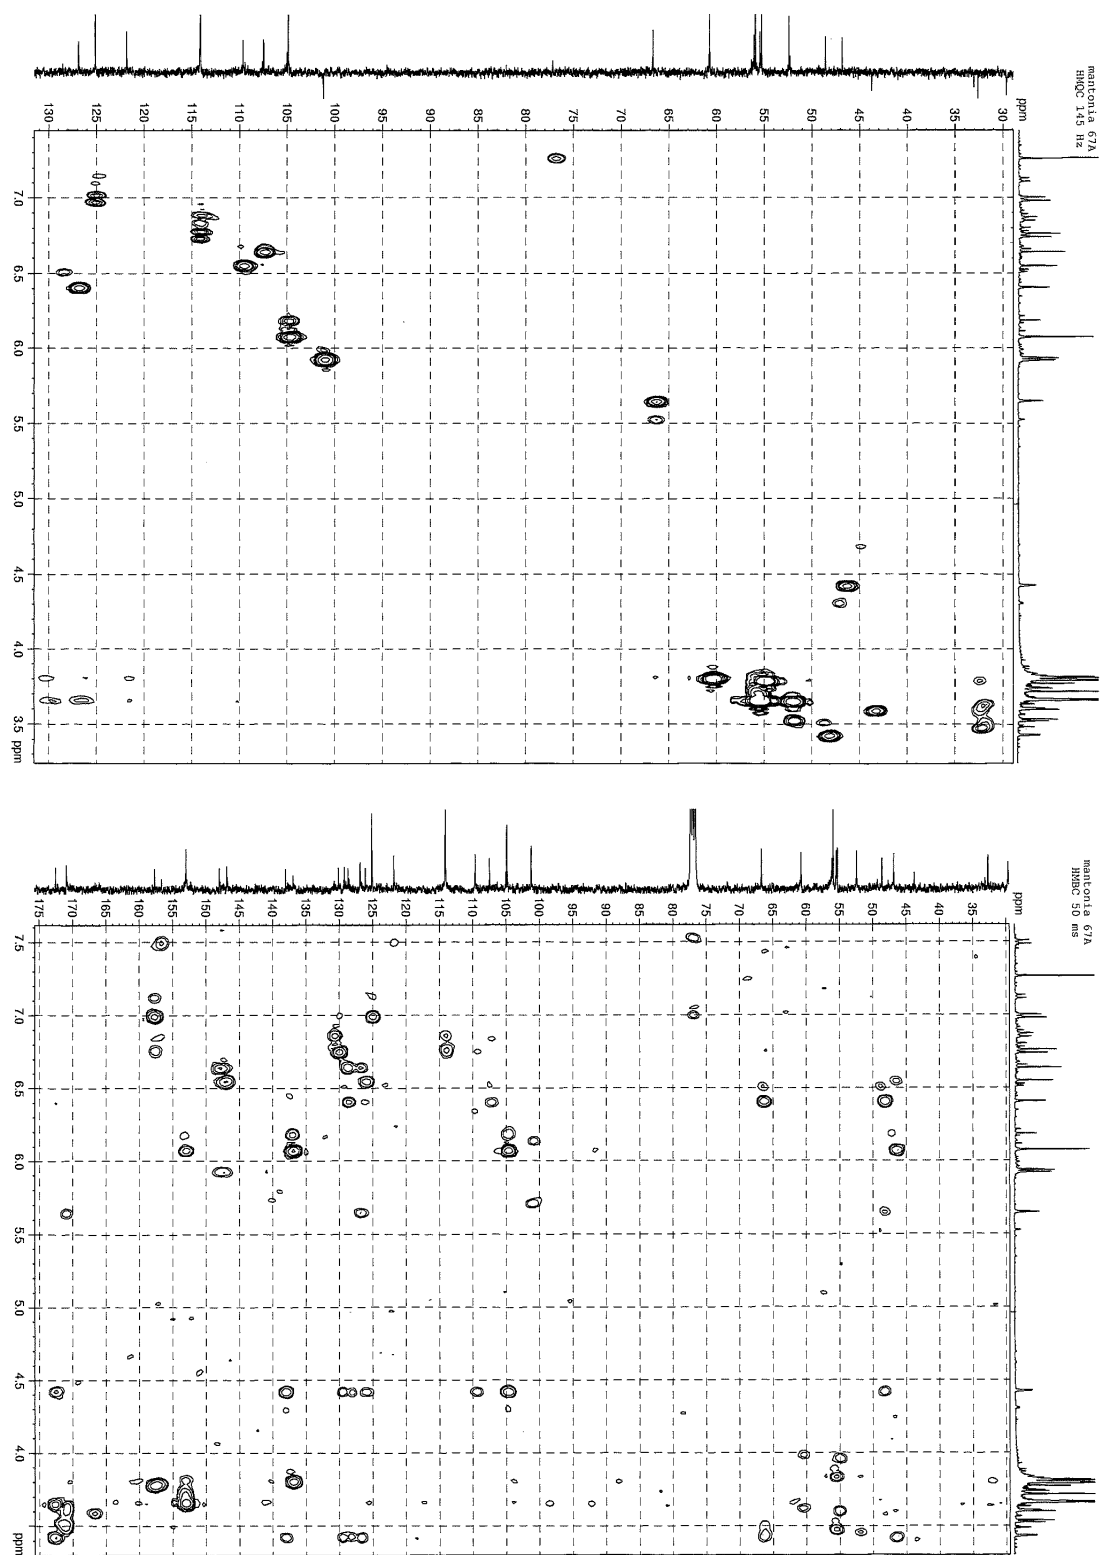

**Figure S44.** HMQC and HMBC for compound **32**
